# Supplementary material for: Electroreductive 4-pyridylation of unsaturated compounds using gaseous ammonia as a hydrogen source
Source: Royal Society of Chemistry journal article supplement (doi:10.1039/d2qo00132b), 2022-01-01
Supplement: d2qo00132b1.pdf [file d2qo00132b1.pdf]

## Supporting Information

### Electroreductive 4-Pyridylation of Unsaturated Compounds

### Using Gaseous Ammonia as Hydrogen Source

Wei jie Ding,<sup>a#</sup> Jie Sheng,<sup>a#</sup> Jin Li,<sup>\*b</sup> and Xu Cheng<sup>\*a</sup>

<sup>a</sup> Institute of Chemistry and Biomedical Sciences, Jiangsu Key Laboratory of Advanced Organic Materials, School of Chemistry and Chemical Engineering, National Demonstration Center for Experimental Chemistry Education, Nanjing University, Nanjing, 210023, China.

<sup>b</sup> Jiangsu Provincial Engineering Laboratory of Advanced Materials for Salt Chemical Industry, College of Chemical Engineering, Huaiyin Institute of Technology, Huaian, 223003, China.

## Table of Contents

|                                                         |     |
|---------------------------------------------------------|-----|
| 1. General Information.....                             | S3  |
| 2. General procedures.....                              | S4  |
| 3. Preparation of the several special substrates .....  | S6  |
| 4. Cyclic voltammetry experiments .....                 | S9  |
| 5. Controlled experiments .....                         | S10 |
| 6. NMR titration .....                                  | S11 |
| 7. Hydrazine in the electrochemical reaction .....      | S12 |
| 8. Large-scale reaction .....                           | S12 |
| 9. Additional optimization with varied parameters ..... | S13 |
| 10. Spectroscopic data for the products .....           | S14 |
| 11. Reference.....                                      | S33 |
| 12. Copies of NMR spectra for the products .....        | S34 |
| 13. HPLC traces of mixture of diastereoisomers: .....   | S90 |

## 1. General Information

Unless otherwise noted, all reactions were carried out under ammonia atmosphere. All materials were obtained from commercial suppliers and used directly without further purification. Other chemical reagents were purchased from commercial sources and used without further purification. Flash chromatography utilized 300-400 mesh silica gel from Qingdao Haiyang Chemical Co., Ltd. Reactions were monitored by thin-layer chromatography (TLC) using 254 nm UV light to visualize the progress of the reactions.  $^1\text{H}$  NMR and  $^{13}\text{C}$  NMR spectra were recorded on Bruker Avance III 400 (400 MHz and 100 MHz). All  $^1\text{H}$  NMR and  $^{13}\text{C}$  NMR spectra are reported in parts per million (ppm) downfield of TMS. Spectra were reported as follows: chemical shift ( $\delta$  ppm), multiplicity (s = singlet, d = doublet, t = triplet, q = quartet, m = multiplet), coupling constants (Hz) and integration. Melting points were measured with digital melting point detector. High-resolution mass spectra (HRMS) were obtained by ESI or EI source and a TOF detector mass spectrometer.

## 2. General procedures

### General procedure A:

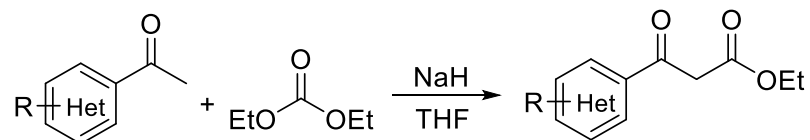

The  $\beta$ -ketoesters were prepared from the acetophenones following a literature-known procedure: <sup>[1]</sup> To a suspension of sodium hydride (0.4 g, 10 mmol, 2.0 eq.) in 20 mL of THF was added appropriately substituted acetophenone (5 mmol, 1.0 eq.) and the mixture stirred at the room temperature for 10 min. Then the mixture was added the diethyl carbonate (10 mmol, 2.0 eq.) and stirred at 70 °C for 2 -3 h until the consumption of acetophenone (monitored by TLC). The reaction mixture was cooled and acidified with saturated  $\text{NH}_4\text{Cl}$  aqueous solution. The aqueous layer was extracted with ethyl acetate, the combined organic layers were dried over  $\text{Na}_2\text{SO}_4$ , filtered and concentrated. The crude product was purified by column chromatography on a silica gel (petroleum ether/ethyl acetate) to afford the desired product.

### General procedure B:

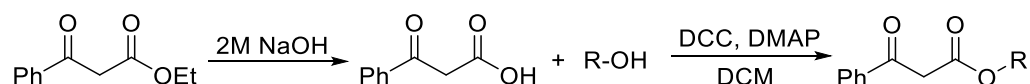

The substrate was prepared following a literature-known procedure: <sup>[2]</sup>  $\beta$ -ketoester (50 mmol, 1.0 eq.) and aqueous NaOH (2 M, 50 mL) are stirred for 12 h at room temperature open to air. Upon completion, the reaction mixture was then diluted with ethyl acetate. Then the aqueous phase was washed twice with ethyl acetate, and then cooled to 0 °C before being acidified with aqueous HCl (3M) to pH 1-2.  $\beta$ -keto acid was filtered, washed with  $\text{H}_2\text{O}$ , dried under vacuum, and used without further purification.

A flask was charged with the  $\beta$ -keto acid (5 mmol, 1.0 eq.), ROH (6 mmol, 1.2 eq.), DMAP (122 mg, 1 mmol, 0.2 eq.) and anhydrous DCM (20 mL). Then the reaction mixture cooled to 0 °C before DCC (7 mmol, 1.4 eq.) was added and stirred for 2-4 h at 0 °C. The reaction was quenched with  $\text{H}_2\text{O}$  and the resulting mixture was extracted with ethyl acetate for three times. The combined organic layers were washed with brine, dried over  $\text{Na}_2\text{SO}_4$ , filtered and concentrated. The residue was purified by flash chromatography to afford the desired product.

### General procedure C:

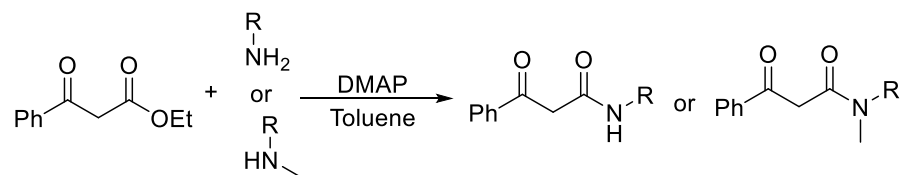

The substrate was prepared following a literature-known procedure: <sup>[3]</sup> A solution of  $\beta$ -ketoester (2.0 mmol, 1.0 eq.), amine (2.0 mmol, 1 eq.), DMAP (0.2 mmol, 0.1 equiv.), 4Å MS (200 mg) and

toluene (4 mL) in a 10 mL sealed tube equipped with a Teflon-coated stirring bar was microwave irradiated at 150 °C for 1 h whereupon the reaction mixture was cooled to room temperature. The solution was removed under reduced pressure and purified by flash chromatography to afford the desired product.

**General procedure D:**

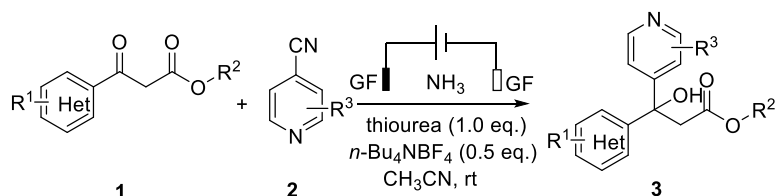

A 10 mL two-necked heart-shaped flask was charged with the substrate **1** (0.2 mmol, 1.0 eq.), **2** (0.6 mmol, 3.0 eq.), thiourea (0.2 mmol, 1.0 eq.),  $n\text{-Bu}_4\text{NBF}_4$  (0.1 mmol, 0.5 eq.) and a magnetic stir bar. The flask was equipped with a rubber stopper, graphite felt (2 cm x 1 cm x 0.5 cm) as anode and cathode. Two electrodes were separated with a Teflon film. The graphite felt anode attached to a platinum wire and cathode attached to a silver wire. A Teflon wire tied around two electrodes. The flask was evacuated and backfilled with ammonia gas for three times and an ammonia gas balloon was connected to this flask via a needle. Then 5 mL of anhydrous  $\text{CH}_3\text{CN}$  was added via syringe. The mixture was stirred under room temperature and constant current electrolysis. After the reaction was completed by monitoring with TLC or GC-MS analysis, quenched with 2M  $\text{Na}_2\text{CO}_3$  aqueous solution (3 mL). The mixture was stirred under air for another 15 minutes. 10 mL of brine was added to the reaction mixture and the aqueous layer was extracted with ethyl acetate. The organic layers were washed with brine, dried over  $\text{Na}_2\text{SO}_4$ , filtered and concentrated. The residue was purified by chromatography on silica gel to afford the desired product.

**Procedure E:**

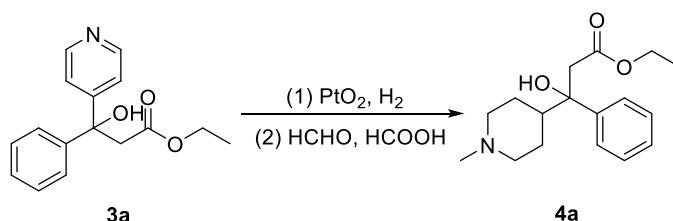

The substrate was prepared following a literature-known procedure:<sup>[4]</sup> To a solution of  $\text{H}_2\text{O}$  (0.8 mL) and  $\text{C}_2\text{H}_5\text{OH}$  (1 mL) was added **3a** (1 mmol), con.  $\text{HCl}$  (200  $\mu\text{L}$ ) and  $\text{PtO}_2$ . The reaction mixture was kept in a flask under hydrogen pressure (150 psi) and hydrogenated for 12 h. After completion of the reaction (monitored by GC-MS), the reaction mixture was filtered through a celite pad, the reaction mixture was extracted with ethyl acetate. The combined organic layers were washed with brine, dried over  $\text{Na}_2\text{SO}_4$ , filtered and concentrated to afford the crude product. Then the crude product, a yellow oil, was dissolved in 5 mL 88% formic acid and 2 mL formalin (37%) was added. After warming on the 110 °C oil bath for 8h, 2M  $\text{HCl}$  was added and the solution was concentrated to dryness in vacuo. The residue was dissolved in water, made basic with ammonium hydroxide and extracted with ethyl acetate. Then the residue purified by chromatography on silica gel to afford the desired product.

### 3. Preparation of the several special substrates

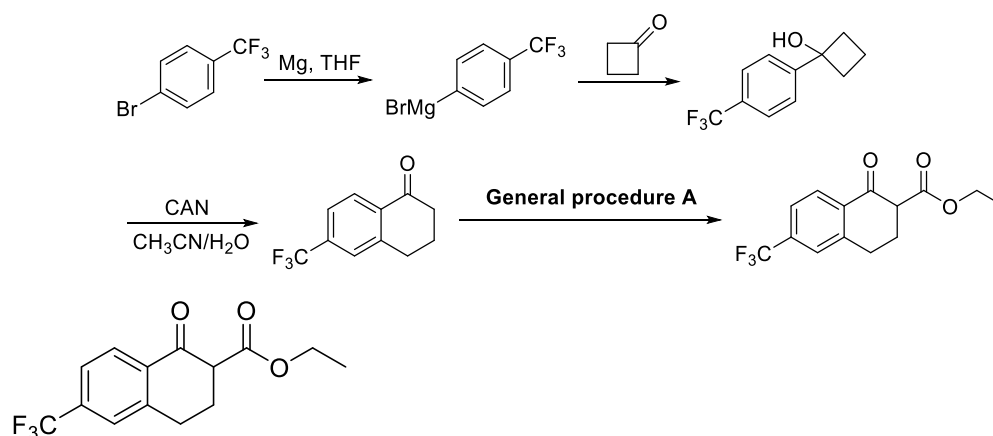

The substrate was prepared following a literature-known procedure:<sup>[5]</sup> The Grignard reagents were prepared in dry THF from the commercially available aryl bromide. Then to the solution of cyclobutanone (1.0 eq.) was added the above Grignard reagent (1.2 eq.) at 0 °C, after addition was complete, the solution was allowed to warm to rt over 15h. The reaction was quenched by the addition of a saturated solution of  $\text{NH}_4\text{Cl}$  and diluted with ethyl acetate. The combined organic layers were washed with brine, dried over  $\text{Na}_2\text{SO}_4$ , filtered and concentrated. The crude product was purified by flash column chromatography to provide compound as an orange-yellow oil. Next, to a solution of above compound, in a water-acetonitrile mixture was stirred in an open reactor at 60 °C for 60s. Subsequently, CAN was added and the mixture was stirred at 60 °C for another 60s. Then, saturated sodium thiosulfate was added to quench the reaction. Followed, the reaction mixture was extracted with ethyl acetate. The combined organic layers were washed with brine, dried over  $\text{Na}_2\text{SO}_4$ , filtered and concentrated. The residue was purified by column chromatography with petroleum ether and diethyl ether to yield the product. Finally, the title compound was prepared following the *General procedure A*.

Ethyl 1-oxo-6-(trifluoromethyl)-1,2,3,4-tetrahydronaphthalene-2-carboxylate. Light yellow liquid.  $^1\text{H}$  NMR (400 MHz,  $\text{CDCl}_3$ )  $\delta$  12.43 (s, 1H), 7.89 (d,  $J = 8.1$  Hz, 1H), 7.53 (d,  $J = 8.0$  Hz, 1H), 7.42 (s, 1H), 4.30 (qd,  $J = 7.1, 1.3$  Hz, 2H), 2.87 (t,  $J = 7.8$  Hz, 2H), 2.66 – 2.56 (m, 2H), 1.36 (td,  $J = 7.2, 1.4$  Hz, 3H).

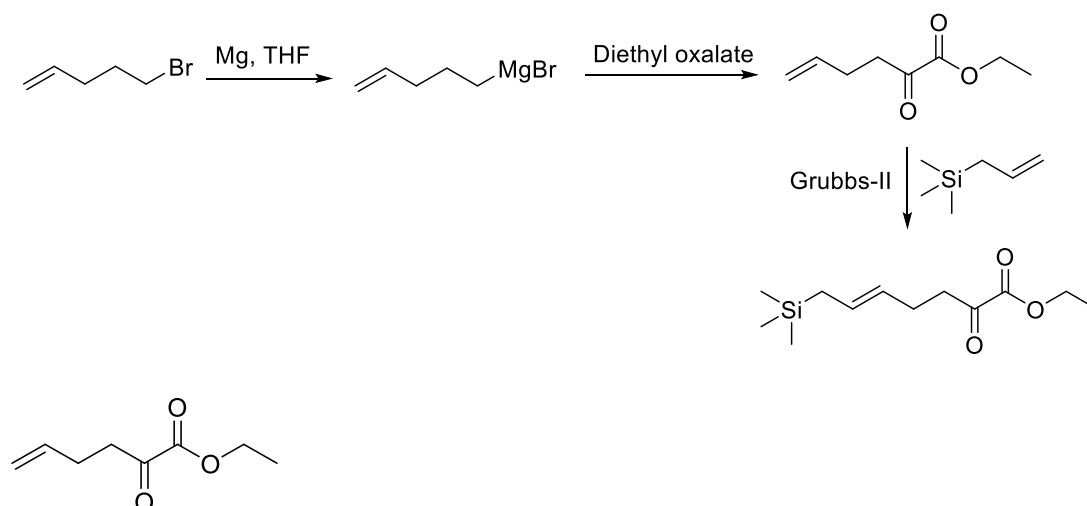

The substrate was prepared following a literature-known procedure:<sup>[6]</sup> The Grignard reagents were prepared in dry THF from the commercially available 4-bromobut-1-ene. Then to a solution of diethyl oxalate (1.0 eq.) in THF/Et<sub>2</sub>O (1:1) was added the above Grignard reagents (1.2 eq.) at –78 °C, after addition was complete, the solution was allowed to warm to –60 °C and stirred at this temperature for 2h. Until the diethyl oxalate was completely consumed, the reaction was quenched by the addition of a saturated solution of NH<sub>4</sub>Cl and diluted with ethyl acetate. The combined organic layers were washed with brine, dried over Na<sub>2</sub>SO<sub>4</sub>, filtered and concentrated. The crude product was purified by flash column chromatography to provide the title compound as a light yellow liquid.

Ethyl 2-oxohex-5-enoate. Light yellow liquid. <sup>1</sup>H NMR (400 MHz, CDCl<sub>3</sub>) δ 5.88 – 5.71 (m, 1H), 5.12 – 4.89 (m, 2H), 4.29 (qd, *J* = 7.2, 2.2 Hz, 2H), 2.92 (t d, *J* = 7.3, 2.1 Hz, 2H), 2.36 (h, *J* = 5.8, 5.3 Hz, 2H), 1.34 (td, *J* = 7.1, 2.2 Hz, 3H).

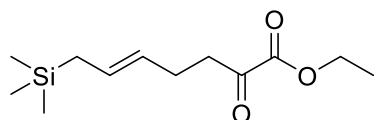

To a solution of ethyl 2-oxohex-5-enoate (1.0 eq.) in CH<sub>2</sub>Cl<sub>2</sub> under Ar was added Grubbs-II (0.02 eq.) and allyltrimethylsilane (3.0 eq.). The solution was allowed to warm to 50 °C and stirred for about 2 h, diluted with ethyl acetate until the ethyl 2-oxohex-5-enoate was almost completely consumed detected by GC-MS. The combined organic layers were washed with brine, dried over Na<sub>2</sub>SO<sub>4</sub>, filtered and concentrated. The crude product was purified by flash column chromatography to provide the title compound as a brown liquid.

Ethyl 2-oxo-7-(trimethylsilyl)hept-5-enoate. Brown liquid. <sup>1</sup>H NMR (400 MHz, CDCl<sub>3</sub>) δ 5.50 – 5.39 (m, 1H), 5.27 – 5.16 (m, 1H), 4.30 (t, *J* = 7.2 Hz, 2H), 2.87 (t, *J* = 7.2 Hz, 2H), 2.36 – 2.27 (m, 2H), 1.39 – 1.33 (m, 5H), -0.03 (s, 9H).

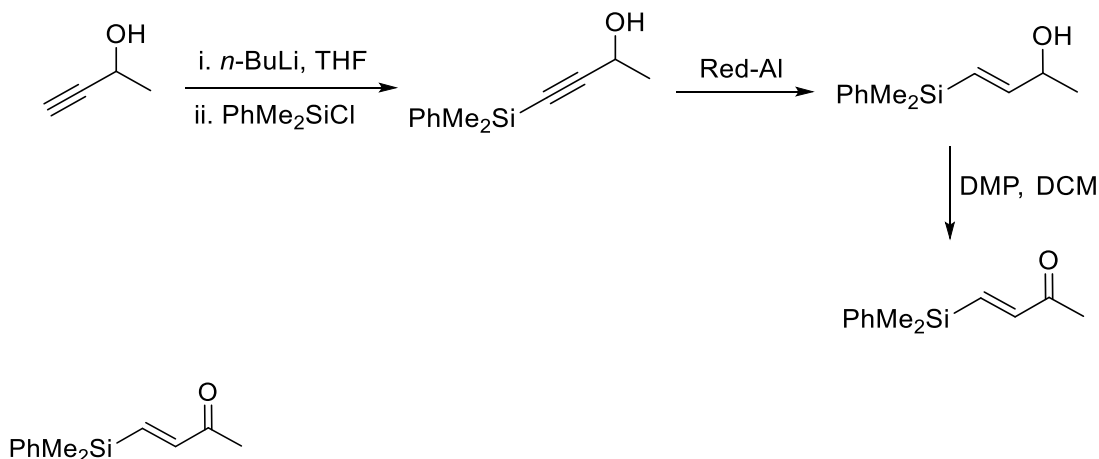

The substrate was prepared following a literature-known procedure:<sup>[7]</sup> To a solution of but-3-yn-2-ol (1.0 eq.) in THF was added *n*-BuLi (2.1 eq.) at  $-78\text{ }^{\circ}\text{C}$ . After addition was complete, the solution was allowed to warm to rt. After 1.5h, the mixture cool to  $-78\text{ }^{\circ}\text{C}$  and chlorodimethyl(phenyl)silane (2.0 eq.) was added dropwise through a syringe. The solution was allowed to warm to rt over 24h, and the reaction was quenched by the addition of an aqueous solution of HCl. The combined organic layers were washed with brine, dried over Na<sub>2</sub>SO<sub>4</sub>, filtered and concentrated. The crude product was purified by flash column chromatography to provide the title compound as a pale yellow liquid. Next, to a solution of 4-(Dimethyl(phenyl)silyl)but-3-yn-2-ol (1.0 eq.) obtained above in Et<sub>2</sub>O was slowly added Red-Al (2.0 eq.) as a solution in Et<sub>2</sub>O at  $0\text{ }^{\circ}\text{C}$ . The mixture warm to rt over 2h and then quenched by an aqueous solution of H<sub>2</sub>SO<sub>4</sub> at  $0\text{ }^{\circ}\text{C}$ . The combined organic layers were washed with brine, dried over Na<sub>2</sub>SO<sub>4</sub>, filtered and concentrated. The crude product was purified by flash column chromatography to provide the title compound as a colorless liquid. Finally, to a solution of (E)-4-(dimethyl(phenyl)silyl)but-3-en-2-ol (1.0 eq.) obtained above in CH<sub>2</sub>Cl<sub>2</sub> was added DMP (1.5 eq.) in three equal portions at 30 minute intervals at rt. The mixture stir for 30 min. The mixture was diluted with 15% aqueous solution of NaOH and Et<sub>2</sub>O and allowed to stir for 10 min. At this time, the layers were separated and the aqueous layer was washed with Et<sub>2</sub>O. The combined organic layers were washed with brine, dried over Na<sub>2</sub>SO<sub>4</sub>, filtered and concentrated. The crude product was purified by flash column chromatography to provide the title compound as a pale yellow liquid.

(E)-4-(dimethyl(phenyl)silyl)but-3-en-2-one. <sup>1</sup>H NMR (400 MHz, Chloroform-*d*)  $\delta$  7.55 – 7.48 (m, 2H), 7.39 (d, *J* = 6.1 Hz, 3H), 7.12 (d, *J* = 19.2 Hz, 1H), 6.49 (d, *J* = 19.2 Hz, 1H), 2.29 (s, 3H), 0.44 (s, 6H).

#### 4. Cyclic voltammetry experiments

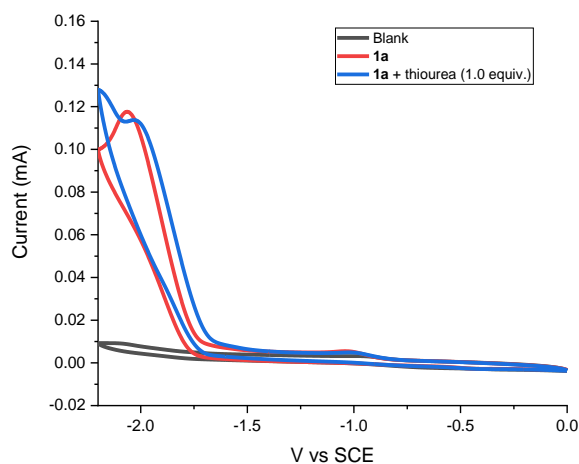

**Figure S1.** Cyclic voltammetry experiment of **1a** and **1a** with thiourea using glassy carbon working electrode at 50 mV/s.

A solution of **1a** (0.1 mmol) and  $n\text{-Bu}_4\text{NBF}_4$  (0.05 mmol) in 5 mL anhydrous  $\text{CH}_3\text{CN}$  was subject to cyclic voltammetry experiment. Electrodes included a glassy carbon working electrode, a Pt counter electrode and a saturated calomel electrode (SCE). Potential sweep rate was 50 mV/s.

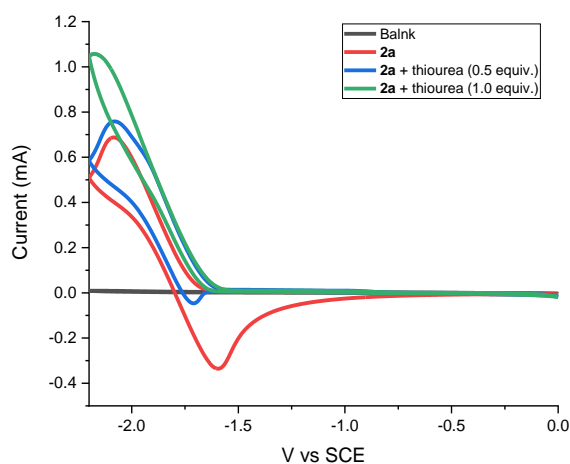

**Figure S2.** Cyclic voltammetry experiment of **2a** and **2a** with thiourea using glassy carbon working electrode at 50 mV/s.

A solution of **2a** (0.2 mmol) and  $n\text{-Bu}_4\text{NBF}_4$  (0.2 mmol) in 5 mL anhydrous  $\text{CH}_3\text{CN}$  was subject to cyclic voltammetry experiment. Electrodes included a glassy carbon working electrode, a Pt counter electrode and a saturated calomel electrode (SCE). Potential sweep rate was 50 mV/s.

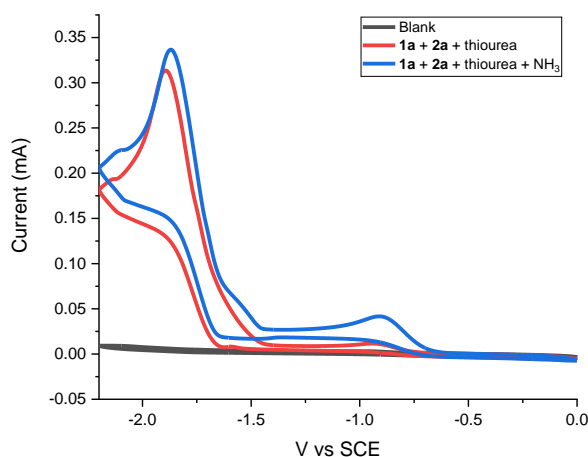

**Figure S3.** Cyclic voltammetry experiment of **1a**, **2a** and thiourea using glassy carbon working electrode at 50 mV/s.

A solution of **1a** (0.05 mmol), **2a** (0.05 mmol), thiourea (0.05 mmol) and *n*-Bu<sub>4</sub>NBF<sub>4</sub> (0.2 mmol) in 5 mL anhydrous CH<sub>3</sub>CN was subject to cyclic voltammetry experiment. Electrodes included a glassy carbon working electrode, a Pt counter electrode and a saturated calomel electrode (SCE). Potential sweep rate was 50 mV/s.

## 5. Controlled experiments

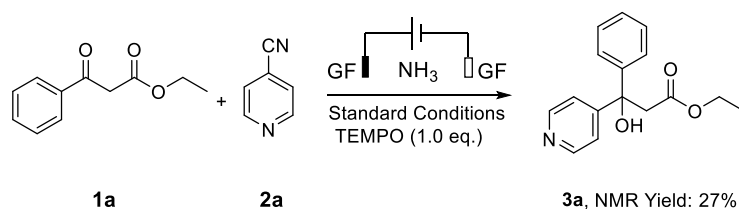

A 10 mL two-necked heart-shaped flask was charged with compound **1a** (0.2 mmol), **2a** (0.6 mmol), thiourea (0.2 mmol), TEMPO (0.2 mmol), *n*-Bu<sub>4</sub>NBF<sub>4</sub> (0.1 mmol) in 5 mL anhydrous CH<sub>3</sub>CN was carried out according to the *general procedure D*. After the reaction completed as monitored with TLC and GC-MS analysis, product **3a** was detected in 27% <sup>1</sup>H NMR yield.

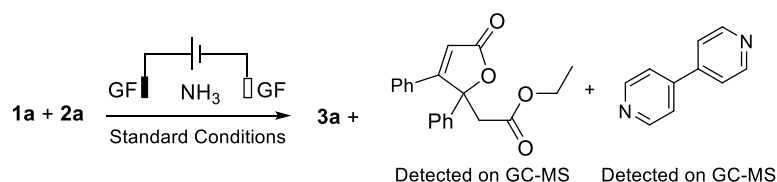

A 10 mL two-necked heart-shaped flask was charged with compound **1a** (0.2 mmol), **2a** (0.6 mmol), thiourea (0.2 mmol), *n*-Bu<sub>4</sub>NBF<sub>4</sub> (0.1 mmol) in 5 mL anhydrous CH<sub>3</sub>CN was carried out according to the *general procedure D*. Then a sample of the reaction mixture was diluted with EtOAc and analyzed with GC-MS.

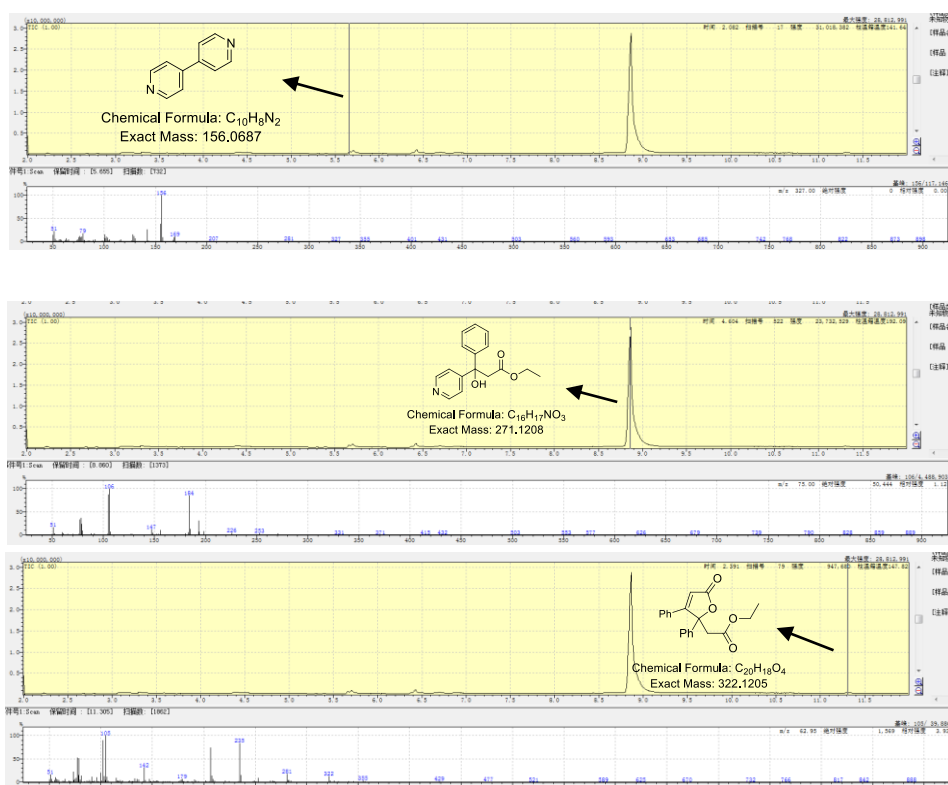

Figure S4. GC-MS analysis of the standard condition.

## 6. NMR titration

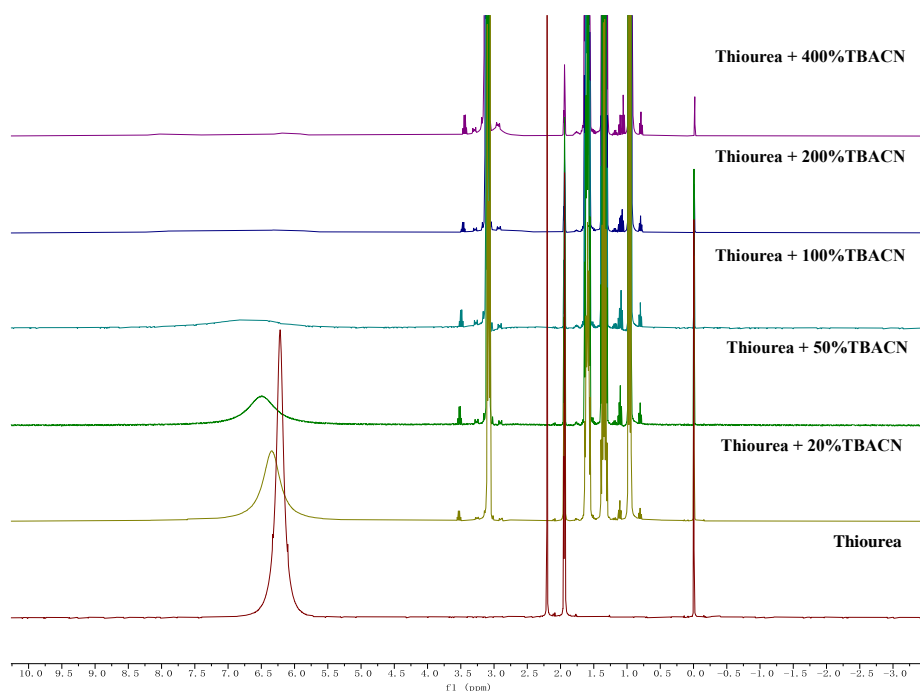

Figure S5. NMR titration of thiourea and tetrabutylammonium cyanide (TBACN).

## 7. Hydrazine in the electrochemical reaction

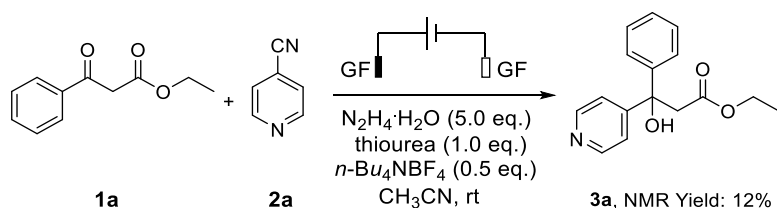

A 10 mL two-necked heart-shaped flask was charged with compound **1a** (0.2 mmol), **2a** (0.6 mmol), thiourea (0.2 mmol), hydrazine mono hydrate (1.0 mmol),  $n\text{-Bu}_4\text{NBF}_4$  (0.1 mmol) in 5 mL anhydrous  $\text{CH}_3\text{CN}$  was carried out according to the *general procedure D*. After the reaction completed as monitored with TLC and GC-MS analysis, product **3a** was detected in 12%  $^1\text{H}$  NMR yield.

## 8. Large-scale reaction

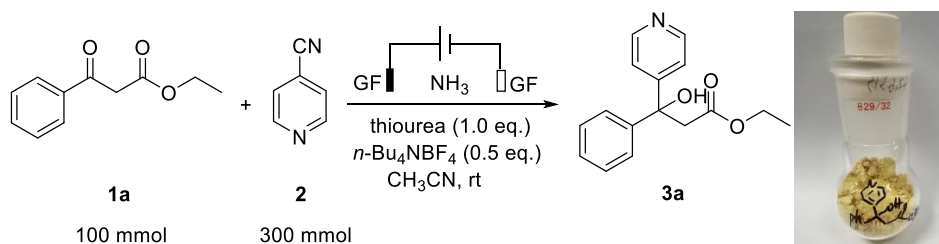

A 500 mL flask (as shown below) was charged with the substrate **1a** (0.1 mol, 1.0 eq.), **2** (0.3 mol, 3.0 eq.), thiourea (0.1 mol, 1.0 eq.),  $n\text{-Bu}_4\text{NBF}_4$  (0.05 mol, 0.5 eq.) and a magnetic stir bar. The flask was equipped with a rubber stopper, graphite felt as anode and cathode separated with pp (200  $\mu\text{m}$ ). The graphite felt attached to a platinum wire. The flask was evacuated and backfilled with ammonia gas for three times and an ammonia gas balloon was connected to this flask via a needle. Then 300 mL of anhydrous  $\text{CH}_3\text{CN}$  was added via syringe. The mixture was stirred under room temperature and constant current (400 mA). After the reaction was completed by monitoring with TLC or GC-MS analysis (90 h), the mixture was extracted with ethyl acetate. The organic layers were washed with brine, dried over  $\text{Na}_2\text{SO}_4$ , filtered and concentrated. The residue was purified by chromatography on silica gel to afford the desire product **3a** as a pale yellow solid (16.3 g, 60%).

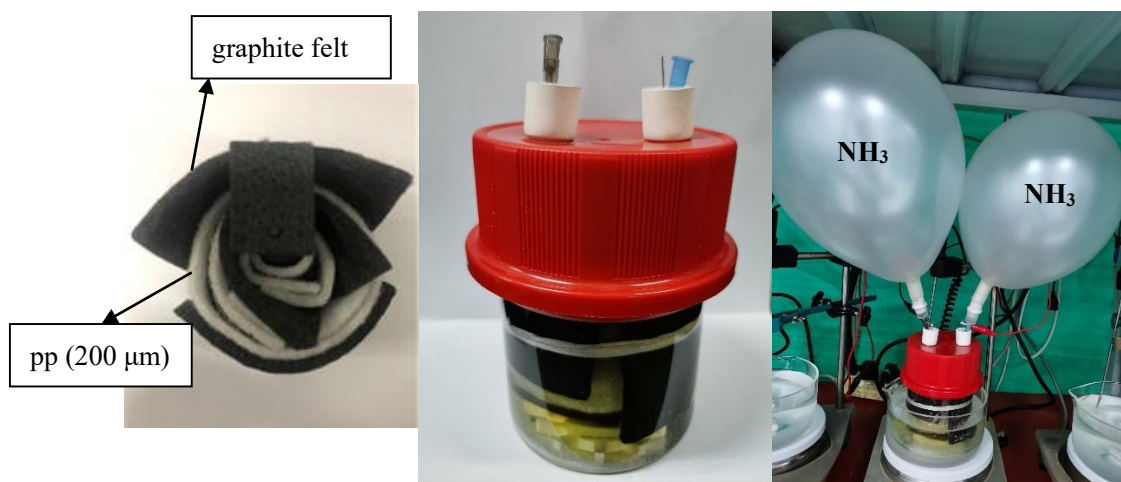

Reaction setup

## 9. Additional optimization with varied parameters

### 9.1) Optimization using different hydrogen source

The reactions were conducted with *general procedure D*, except ammonia was replaced by other hydrogen sources.

| Entry | Hydrogen Sources            | NMR Yield |
|-------|-----------------------------|-----------|
| 1     | H <sub>2</sub> O (10 eq)    | 45%       |
| 2     | HCOONH <sub>4</sub> (10 eq) | 26%       |
| 3     | <i>i</i> PrOH (10 eq)       | 15%       |

**1a** (0.2 mmol), **2a** (3.0 equiv.), thiourea (1.0 equiv.), *n*Bu<sub>4</sub>NBF<sub>4</sub> (0.5 equiv.), CH<sub>3</sub>CN (5 mL), graphite felt as anode and cathode, undivided cell, 20 mA/cm<sup>2</sup>, 4 h.

### 9.2) Optimization using different solvent

The reactions were conducted with *general procedure D*, except CH<sub>3</sub>CN was replaced by other solvents.

| Entry | Solvents | NMR Yield |
|-------|----------|-----------|
| 1     | DMAc     | nd        |
| 2     | DCE      | 16%       |
| 3     | EtOH     | 24%       |

**1a** (0.2 mmol), **2a** (3.0 equiv.), thiourea (1.0 equiv.), *n*Bu<sub>4</sub>NBF<sub>4</sub> (0.5 equiv.), solvent (5 mL), graphite felt as anode and cathode, NH<sub>3</sub>, undivided cell, 20 mA/cm<sup>2</sup>, 4 h.

### 9.3) Optimized the current efficiency of standard reaction

A 10 mL two-necked heart-shaped flask was charged with the substrate **1a** (1.0 mmol, 1.0 eq.), **2** (3.0 mmol, 3.0 eq.), thiourea (1.0 mmol, 1.0 eq.), *n*-Bu<sub>4</sub>NBF<sub>4</sub> (0.5 mmol, 0.5 eq.) and a magnetic stir bar. The flask was equipped with a rubber stopper, graphite felt (2 cm x 1 cm x 0.5 cm) as anode and cathode. Two electrodes were separated with a Teflon film. The graphite felt anode attached to a platinum wire and cathode attached to a silver wire. A Teflon wire tied around two electrodes. The

flask was evacuated and backfilled with ammonia gas for three times and an ammonia gas balloon was connected to this flask via a needle. Then 5 mL of anhydrous CH<sub>3</sub>CN was added via syringe. The mixture was stirred under room temperature and constant current electrolysis (20 mA). After four hours of reaction, 50% of the target products were produced by <sup>1</sup>H NMR analysis. It can be calculated that the current efficiency of the reaction can be increased to 33.5%.

| Entry | concentration of <b>1a</b> | current efficiency (%) |
|-------|----------------------------|------------------------|
| 1     | 0.04 M                     | 9.6                    |
| 2     | 0.2 M                      | 33.5                   |

## 10. Spectroscopic data for the products

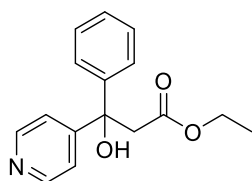

### Ethyl 3-hydroxy-3-phenyl-3-(pyridin-4-yl)propanoate (**3a**)

Following the *general procedure D*, when the reaction was finished after 4 h, the product **3a** was isolated by chromatography on silica gel (PE/EA = 1/1, eluent) as a light yellow solid (72%, 39.0 mg). <sup>1</sup>H NMR (400 MHz, CDCl<sub>3</sub>) δ 8.51 (d, *J* = 4.6 Hz, 2H), 7.43 – 7.40 (m, 2H), 7.35 (d, *J* = 6.1 Hz, 2H), 7.31 (t, *J* = 7.5 Hz, 2H), 7.24 (t, *J* = 7.2 Hz, 1H), 5.24 (s, 1H), 4.09 (q, *J* = 7.1 Hz, 2H), 3.24 (q, *J* = 16.3 Hz, 2H), 1.15 (t, *J* = 7.1 Hz, 3H). <sup>13</sup>C NMR (101 MHz, CDCl<sub>3</sub>) δ 172.21, 154.72, 149.75, 144.38, 128.45, 127.58, 125.40, 120.56, 75.61, 61.20, 44.72, 13.90. HRMS (ESI): *m/z* [*M* + *H*]<sup>+</sup> calcd for C<sub>16</sub>H<sub>18</sub>NO<sub>3</sub>: 272.1287; found: 272.1286.

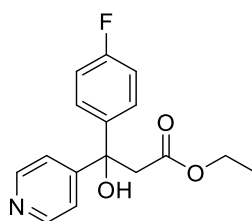

### Ethyl 3-(4-fluorophenyl)-3-hydroxy-3-(pyridin-4-yl)propanoate (**3b**)

Following the *general procedure D*, when the reaction was finished after 4 h, the product **3b** was isolated by chromatography on silica gel (PE/EA = 1/1, eluent) as a yellow solid (62%, 35.8 mg). <sup>1</sup>H NMR (400 MHz, CDCl<sub>3</sub>) δ 8.52 (d, *J* = 5.8 Hz, 2H), 7.34 (dd, *J* = 10.4, 7.4 Hz, 4H), 7.28 (d, *J* = 8.7 Hz, 2H), 5.29 (s, 1H), 4.10 (q, *J* = 7.1 Hz, 2H), 3.25 – 3.15 (m, 2H), 1.16 (t, *J* = 7.1 Hz, 3H). <sup>13</sup>C NMR (101 MHz, CDCl<sub>3</sub>) δ 172.05, 154.26, 149.86, 143.01, 133.58, 128.62, 126.92, 120.42, 77.32, 77.00, 76.68, 75.29, 61.36, 44.56, 13.92. HRMS (ESI): *m/z* [*M* + Na]<sup>+</sup> calcd for C<sub>16</sub>H<sub>16</sub>FNO<sub>3</sub>Na: 312.1012; found: 312.1020.

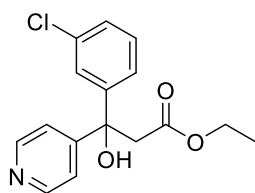

**Ethyl 3-(3-chlorophenyl)-3-hydroxy-3-(pyridin-4-yl)propanoate (3c)**

Following the *general procedure D*, when the reaction was finished after 4 h, the product **3c** was isolated by chromatography on silica gel (PE/EA = 1/1, eluent) as a light yellow oil (60%, 36.6 mg). <sup>1</sup>H NMR (400 MHz, CDCl<sub>3</sub>) δ 8.55 (d, *J* = 6.0 Hz, 2H), 7.47 (s, 1H), 7.37 (d, *J* = 6.0 Hz, 2H), 7.31 – 7.23 (m, 3H), 5.33 (s, 1H), 4.15 – 4.10 (m, 2H), 3.28 – 3.19 (m, 2H), 1.19 (t, *J* = 7.1 Hz, 3H). <sup>13</sup>C NMR (101 MHz, CDCl<sub>3</sub>) δ 172.01, 154.12, 149.83, 146.5, 134.59, 129.74, 127.81, 125.85, 123.61, 120.45, 75.30, 61.39, 44.53, 13.91. HRMS (ESI): *m/z* [M + H]<sup>+</sup> calcd for C<sub>16</sub>H<sub>17</sub>ClNO<sub>3</sub>: 306.0897; found: 306.0894.

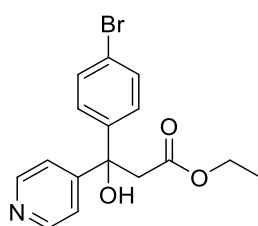

**Ethyl 3-(4-bromophenyl)-3-hydroxy-3-(pyridin-4-yl)propanoate (3d)**

Following the *general procedure D*, when the reaction was finished after 4 h, the product **3d** was isolated by chromatography on silica gel (PE/EA = 1/1, eluent) as a light yellow oil (62%, 43.3 mg). <sup>1</sup>H NMR (400 MHz, CDCl<sub>3</sub>) δ 8.52 (d, *J* = 6.0 Hz, 2H), 7.47 – 7.40 (m, 2H), 7.32 (dd, *J* = 4.6, 1.6 Hz, 2H), 7.31 – 7.26 (m, 2H), 5.29 (s, 1H), 4.10 (q, *J* = 7.1 Hz, 2H), 3.27 – 3.13 (m, 2H), 1.17 (t, *J* = 7.1 Hz, 3H). <sup>13</sup>C NMR (101 MHz, CDCl<sub>3</sub>) δ 172.03, 154.21, 149.85, 143.54, 131.58, 127.25, 121.76, 120.42, 75.32, 61.37, 44.48, 13.91. HRMS (ESI): *m/z* [M + H]<sup>+</sup> calcd for C<sub>16</sub>H<sub>17</sub>BrNO<sub>3</sub>: 350.0392; found: 350.0389.

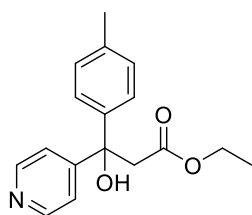

**Ethyl 3-hydroxy-3-(pyridin-4-yl)-3-(p-tolyl)propanoate (3e)**

Following the *general procedure D*, when the reaction was finished after 4 h, the product **3e** was isolated by chromatography on silica gel (PE/EA = 1/1, eluent) as a colorless oil (60%, 33.1 mg). <sup>1</sup>H NMR (400 MHz, CDCl<sub>3</sub>) δ 8.51 (d, *J* = 5.2 Hz, 2H), 7.35 (d, *J* = 5.7 Hz, 2H), 7.29 (d, *J* = 8.1 Hz, 2H), 7.12 (d, *J* = 8.0 Hz, 2H), 5.17 (s, 1H), 4.10 (q, *J* = 7.0 Hz, 2H), 3.22 (q, *J* = 16.5 Hz, 2H), 2.30 (s, 3H), 1.17 (t, *J* = 7.0 Hz, 3H). <sup>13</sup>C NMR (101 MHz, CDCl<sub>3</sub>) δ 172.30, 154.91, 149.76, 141.50, 137.32, 129.15, 125.32, 120.51, 75.52, 61.18, 44.74, 20.91, 13.93. HRMS (ESI): *m/z* [M + H]<sup>+</sup> calcd for C<sub>17</sub>H<sub>20</sub>NO<sub>3</sub>: 286.1443; found: 286.1450.

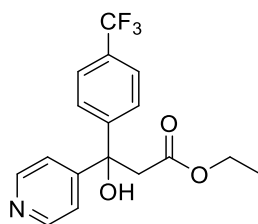

**Ethyl 3-hydroxy-3-(pyridin-4-yl)-3-(4-(trifluoromethyl)phenyl)propanoate (3f)**

Following the *general procedure D*, when the reaction was finished after 4 h, the product **3f** was isolated by chromatography on silica gel (PE/EA = 1/1, eluent) as a light yellow oil (58%, 39.3 mg). <sup>1</sup>H NMR (400 MHz, CDCl<sub>3</sub>) δ 8.54 (dd, *J* = 4.7, 1.5 Hz, 2H), 7.61 – 7.52 (m, 4H), 7.35 (dd, *J* = 4.6, 1.6 Hz, 2H), 5.35 (s, 1H), 4.11 (q, *J* = 7.1 Hz, 2H), 3.30 – 3.19 (m, 2H), 1.18 (t, *J* = 7.1 Hz, 3H). <sup>13</sup>C NMR (101 MHz, CDCl<sub>3</sub>) δ 172.03, 153.96, 149.94, 148.35, 129.92 (q, *J* = 33.3 Hz), 125.90, 125.51 (q, *J* = 3.7 Hz), 123.89 (d, *J* = 272.7 Hz), 120.45, 75.44, 61.51, 44.46, 13.91. HRMS (ESI): *m/z* [M + H]<sup>+</sup> calcd for C<sub>17</sub>H<sub>17</sub>NO<sub>3</sub>: 286.1443; found: 286.1450. HRMS (ESI): *m/z* [M + H]<sup>+</sup> calcd for C<sub>17</sub>H<sub>17</sub>F<sub>3</sub>NO<sub>3</sub>: 340.1161; found: 340.1167.

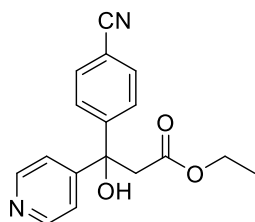

**Ethyl 3-(4-cyanophenyl)-3-hydroxy-3-(pyridin-4-yl)propanoate (3g)**

Following the *general procedure D*, when the reaction was finished after 4 h, the product **3g** was isolated by chromatography on silica gel (PE/EA = 1/1, eluent) as a colorless oil (38%, 22.5 mg). <sup>1</sup>H NMR (400 MHz, CDCl<sub>3</sub>) δ 8.55 (d, *J* = 6.0 Hz, 2H), 7.63 – 7.61 (m, 2H), 7.57 – 7.55 (m, 1H), 7.34 (d, *J* = 6.0 Hz, 2H), 5.34 (s, 1H), 4.12 (q, *J* = 7.1 Hz, 2H), 3.23 (s, 2H), 1.19 (t, *J* = 7.1 Hz, 3H). <sup>13</sup>C NMR (101 MHz, CDCl<sub>3</sub>) δ 171.91, 153.52, 150.03, 149.54, 132.38, 126.28, 120.37, 118.33, 111.73, 75.41, 61.64, 44.23, 13.94. HRMS (ESI): *m/z* [M + H]<sup>+</sup> calcd for C<sub>17</sub>H<sub>16</sub>N<sub>2</sub>O<sub>3</sub>: 297.1239; found: 297.1240.

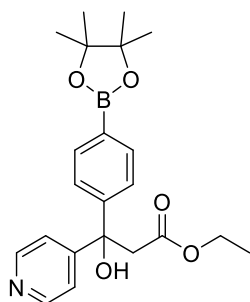

**Ethyl-3-hydroxy-3-(pyridin-4-yl)-3-(4-(4,4,5,5-tetramethyl-1,3,2-dioxaborolan-2-yl)phenyl)propanoate (3h)**

Following the *general procedure D*, when the reaction was finished after 4 h, the product **3h** was isolated by chromatography on silica gel (PE/EA = 1/1, eluent) as a white solid (40%, 30.7 mg). <sup>1</sup>H NMR (400 MHz, CDCl<sub>3</sub>) δ 8.51 (d, *J* = 5.1 Hz, 2H), 7.77 (d, *J* = 7.9 Hz, 2H), 7.43 (d, *J* = 7.9 Hz, 2H), 7.35 (d, *J* = 5.3 Hz, 2H), 5.22 (s, 1H), 4.12 – 4.07 (m, 2H), 3.24 (dd, *J* = 37.4, 16.5 Hz, 2H), 1.31 (s, 12H), 1.18 (t, *J* = 7.1 Hz, 3H). <sup>13</sup>C NMR (101 MHz, CDCl<sub>3</sub>) δ 172.29, 154.60, 149.73,

147.27, 135.02, 124.70, 120.53, 83.84, 75.68, 74.97, 61.32, 44.48, 24.82, 24.79, 13.96. HRMS (ESI):  $m/z$   $[M + H]^+$  calcd for  $C_{22}H_{29}BNO_5$ : 398.2139; found: 398.2141.

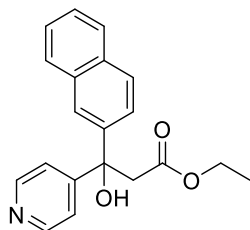

**Ethyl 3-hydroxy-3-(naphthalen-2-yl)-3-(pyridin-4-yl)propanoate (3i)**

Following the *general procedure D*, when the reaction was finished after 4 h, the product **3i** was isolated by chromatography on silica gel (PE/EA = 1/1, eluent) as a yellow solid (75%, 48.2 mg).  $^1H$  NMR (400 MHz,  $CDCl_3$ )  $\delta$  8.53 (d,  $J$  = 6.0 Hz, 2H), 7.91 (d,  $J$  = 1.4 Hz, 1H), 7.84 – 7.77 (m, 3H), 7.50 – 7.47 (m, 3H), 7.41 (dd,  $J$  = 4.6, 1.6 Hz, 2H), 5.38 (s, 1H), 4.12 (qd,  $J$  = 7.1, 1.7 Hz, 2H), 3.35 (dd,  $J$  = 41.8, 16.3 Hz, 2H), 1.17 (t,  $J$  = 7.1 Hz, 3H).  $^{13}C$  NMR (101 MHz,  $CDCl_3$ )  $\delta$  172.31, 154.65, 149.74, 141.69, 132.91, 132.58, 128.47, 128.20, 127.50, 126.36, 126.33, 123.92, 123.87, 120.70, 75.82, 61.29, 44.62, 13.94. HRMS (ESI):  $m/z$   $[M + H]^+$  calcd for  $C_{20}H_{20}NO_3$ : 322.1443; found: 322.1450.

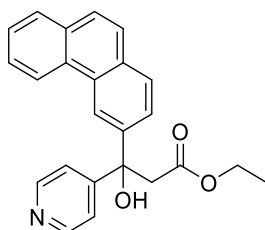

**Ethyl 3-hydroxy-3-(phenanthren-3-yl)-3-(pyridin-4-yl)propanoate (3j)**

Following the *general procedure D*, when the reaction was finished after 4 h, the product **3j** was isolated by chromatography on silica gel (PE/EA = 1/1, eluent) as a yellow solid (74%, 54.9 mg).  $^1H$  NMR (400 MHz,  $CDCl_3$ )  $\delta$  8.87 (s, 1H), 8.71 (d,  $J$  = 8.2 Hz, 1H), 8.58 (d,  $J$  = 5.0 Hz, 2H), 7.91 (d,  $J$  = 7.7 Hz, 1H), 7.86 (d,  $J$  = 8.4 Hz, 1H), 7.78 – 7.69 (m, 3H), 7.63 (t,  $J$  = 7.8 Hz, 2H), 7.48 (d,  $J$  = 5.0 Hz, 2H), 5.50 (s, 1H), 4.15 (q,  $J$  = 7.1 Hz, 2H), 3.44 (dd,  $J$  = 51.6, 16.3 Hz, 2H), 1.20 (t,  $J$  = 7.1 Hz, 3H).  $^{13}C$  NMR (101 MHz,  $CDCl_3$ )  $\delta$  172.37, 154.71, 149.83, 142.40, 132.18, 131.21, 130.17, 128.94, 128.63, 127.42, 126.76, 126.63, 126.26, 124.32, 122.55, 120.69, 119.13, 76.12, 61.37, 44.90, 13.97. HRMS (ESI):  $m/z$   $[M + H]^+$  calcd for  $C_{24}H_{22}NO_3$ : 372.1600; found: 372.1608.

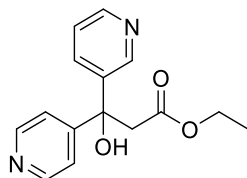

**Ethyl 3-hydroxy-3-(pyridin-3-yl)-3-(pyridin-4-yl)propanoate (3k)**

Following the *general procedure D*, when the reaction was finished after 4 h, the product **3k** was isolated by chromatography on silica gel (PE/EA = 1/2, eluent) as a light yellow oil (36%, 19.6 mg).  $^1H$  NMR (400 MHz,  $CDCl_3$ )  $\delta$  8.69 (s, 1H), 8.58 (s, 2H), 8.53 (s, 1H), 7.79 (d,  $J$  = 7.8 Hz, 1H), 7.38 (s, 2H), 7.28 (s, 1H), 5.38 (s, 1H), 4.14 (q,  $J$  = 6.4, 5.9 Hz, 2H), 3.28 (s, 2H), 1.21 (t,  $J$  = 6.5 Hz, 3H).  $^{13}C$  NMR (101 MHz,  $CDCl_3$ )  $\delta$  171.98, 153.72, 150.08, 148.96, 146.90, 139.99, 133.49, 123.39,

120.38, 74.51, 61.57, 44.31, 13.93. HRMS (ESI):  $m/z$   $[M + H]^+$  calcd for  $C_{15}H_{17}N_2O_3$ : 273.1239; found: 273.1241.

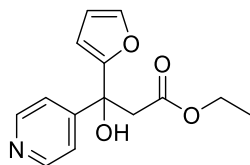

**Ethyl 3-(furan-2-yl)-3-hydroxy-3-(pyridin-4-yl)propanoate (3l)**

Following the *general procedure D*, when the reaction was finished after 4 h, the product **3l** was isolated by chromatography on silica gel (PE/EA = 1/1, eluent) as a yellow solid (56%, 29.2 mg).  $^1H$  NMR (400 MHz,  $CDCl_3$ )  $\delta$  8.54 (d,  $J$  = 6.1 Hz, 2H), 7.39 (d,  $J$  = 6.1 Hz, 2H), 7.37 – 7.33 (m, 1H), 6.30 (dd,  $J$  = 3.3, 1.8 Hz, 1H), 6.22 (d,  $J$  = 3.3 Hz, 1H), 5.27 (s, 1H), 4.10 (dtt,  $J$  = 10.8, 7.1, 3.7 Hz, 2H), 3.17 (m, 2H), 3.02 (d,  $J$  = 16.2 Hz, 1H), 1.16 (t,  $J$  = 7.1 Hz, 3H).  $^{13}C$  NMR (101 MHz,  $CDCl_3$ )  $\delta$  171.71, 155.79, 152.42, 149.66, 142.51, 120.34, 110.43, 106.96, 72.68, 61.25, 43.76, 13.89. HRMS (ESI):  $m/z$   $[M + H]^+$  calcd for  $C_{14}H_{16}NO_4$ : 262.1079; found: 262.1087.

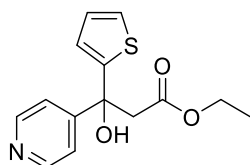

**Ethyl 3-hydroxy-3-(pyridin-4-yl)-3-(thiophen-2-yl)propanoate (3m)**

Following the *general procedure D*, when the reaction was finished after 4 h, the product **3m** was isolated by chromatography on silica gel (PE/EA = 1/1, eluent) as a yellow solid (64%, 35.5 mg).  $^1H$  NMR (400 MHz,  $CDCl_3$ )  $\delta$  8.55 (d,  $J$  = 6.1 Hz, 2H), 7.42 (d,  $J$  = 6.2 Hz, 2H), 7.24 (d,  $J$  = 5.0 Hz, 1H), 6.93 – 6.89 (m, 2H), 5.52 (s, 1H), 4.11 (q,  $J$  = 7.1 Hz, 2H), 3.24 (dd,  $J$  = 47.3, 16.3 Hz, 2H), 1.17 (t,  $J$  = 7.1 Hz, 3H).  $^{13}C$  NMR (101 MHz,  $CDCl_3$ )  $\delta$  171.79, 153.94, 149.82, 149.48, 126.65, 125.75, 123.75, 120.15, 74.56, 61.39, 45.86, 13.91. HRMS (ESI):  $m/z$   $[M + H]^+$  calcd for  $C_{14}H_{16}NO_3S$ : 278.0851; found: 278.0847.

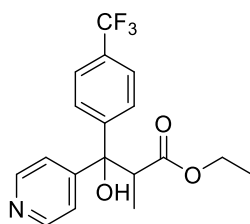

**Ethyl 3-hydroxy-2-methyl-3-(pyridin-4-yl)-3-(4-(trifluoromethyl)phenyl)propanoate (3n)**

Following the *general procedure D*, when the reaction was finished after 4 h, the product **3n** was isolated by chromatography on silica gel (PE/EA = 1/1, eluent) as a yellow oil (61%, 43.1 mg).  $^1H$  NMR (400 MHz,  $CDCl_3$ )  $\delta$  8.52 (s, 2H), 7.67 (d,  $J$  = 7.9 Hz, 2H), 7.57 (s, 2H), 7.39 – 7.34 (m, 2H), 4.97 (s, 0H), 4.92 (s, 1H), 4.09 – 4.05 (m, 2H), 3.64 – 3.58 (m, 1H), 1.16 – 1.12 (m, 6H).  $^{13}C$  NMR (101 MHz,  $CDCl_3$ )  $\delta$  176.58, 152.09, 149.88, 125.72, 125.54, 125.50, 125.47, 125.43, 120.24, 77.36, 61.35, 46.08, 13.84, 12.64.  $^{19}F$  NMR (376 MHz,  $CDCl_3$ )  $\delta$  -62.66. HRMS (ESI):  $m/z$   $[M + H]^+$  calcd for  $C_{18}H_{19}F_3NO_3$ : 354.1317; found: 354.1315.

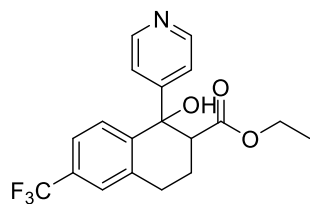

**Ethyl 1-hydroxy-1-(pyridin-4-yl)-6-(trifluoromethyl)1,2,3,4-tetrahydronaphthalene-2-carboxylate (3o)**

Following the *general procedure D*, when the reaction was finished after 4 h, the product **3o** was isolated by chromatography on silica gel (PE/EA = 1/1, eluent) as a light yellow oil (48%, 35.0 mg). <sup>1</sup>H NMR (400 MHz, CDCl<sub>3</sub>) δ 8.58 (d, *J* = 5.1 Hz, 2H), 7.46 (s, 1H), 7.37 (d, *J* = 8.3 Hz, 1H), 7.28 (d, *J* = 5.5 Hz, 2H), 7.05 (d, *J* = 8.2 Hz, 1H), 5.26 (s, 1H), 4.08 (tq, *J* = 7.1, 3.2 Hz, 2H), 3.15 (dd, *J* = 10.9, 2.9 Hz, 1H), 3.12 – 3.05 (m, 2H), 2.45 (ddt, *J* = 15.6, 10.8, 7.8 Hz, 1H), 2.12 (dt, *J* = 13.2, 3.5 Hz, 1H), 1.13 (t, *J* = 7.1 Hz, 3H). <sup>13</sup>C NMR (101 MHz, CDCl<sub>3</sub>) δ 174.76, 155.13, 149.45, 142.74, 136.43, 130.04, 125.72 (q, *J* = 4.0 Hz), 123.85 (d, *J* = 271.0 Hz), 123.47 (q, *J* = 4.0 Hz), 121.74, 74.56, 61.39, 50.95, 28.37, 22.42, 13.88. <sup>19</sup>F NMR (376 MHz, CDCl<sub>3</sub>) δ -62.79. HRMS (ESI): *m/z* [M + H]<sup>+</sup> calcd for C<sub>19</sub>H<sub>19</sub>F<sub>3</sub>NO<sub>3</sub>: 366.1317; found: 366.1318.

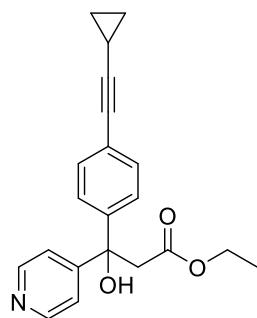

**Ethyl 3-(4-(cyclopropylethynyl)phenyl)-3-hydroxy-3-(pyridin-4-yl)propanoate (3p)**

Following the *general procedure D*, when the reaction was finished after 4 h, the product **3p** was isolated by chromatography on silica gel (PE/EA = 1/1, eluent) as a white solid (78%, 52.3 mg). <sup>1</sup>H NMR (400 MHz, CDCl<sub>3</sub>) δ 8.49 (d, *J* = 5.1 Hz, 2H), 7.32 – 7.30 (m, 6H), 5.26 (s, 1H), 4.06 (q, *J* = 7.1 Hz, 2H), 3.18 (q, *J* = 16.3 Hz, 2H), 1.43 – 1.36 (m, 1H), 1.14 (t, *J* = 7.1 Hz, 3H), 0.85 – 0.79 (m, 2H), 0.77 – 0.73 (m, 2H). <sup>13</sup>C NMR (101 MHz, CDCl<sub>3</sub>) δ 172.04, 154.39, 149.73, 143.53, 131.62, 125.29, 123.32, 120.46, 93.99, 75.45, 75.12, 61.22, 44.54, 13.88, 8.53, 0.06. HRMS (ESI): *m/z* [M + H]<sup>+</sup> calcd for C<sub>21</sub>H<sub>22</sub>NO<sub>3</sub>: 336.1600; found: 336.1607.

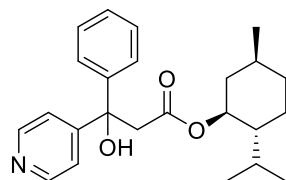

**(1S,2R,5S)-2-isopropyl-5-methylcyclohexyl 3-hydroxy-3-phenyl-3-(pyridin-4-yl)propanoate (3q)**

Following the *general procedure D*, when the reaction was finished after 4 h, the product **3q** was isolated by chromatography on silica gel (PE/EA = 1/1, eluent) as a yellow solid (56%, 42.7 mg). <sup>1</sup>H NMR (400 MHz, CDCl<sub>3</sub>) δ 8.52 (t, *J* = 4.1 Hz, 2H), 7.42 (d, *J* = 7.7 Hz, 2H), 7.37 (d, *J* = 5.7 Hz, 2H), 7.33 – 7.29 (m, 2H), 7.26 – 7.22 (m, 1H), 5.33 (s, 1H), 4.64 (td, *J* = 10.9, 4.3 Hz, 1H), 3.30 –

3.16 (m, 2H), 1.78 – 1.75 (m, 1H), 1.65 – 1.55 (m, 3H), 1.41 – 1.35 (m, 2H), 0.99 – 0.95 (m, 1H), 0.88 – 0.83 (m, 8H), 0.57 (dd,  $J = 6.9, 3.6$  Hz, 3H).  $^{13}\text{C}$  NMR (101 MHz,  $\text{CDCl}_3$ )  $\delta$  171.96, 154.73, 149.77, 144.35, 128.46, 127.61, 125.48, 120.60, 75.69, 75.49, 46.79, 45.04, 40.51, 34.00, 31.28, 26.10, 23.14, 21.85, 20.68, 15.94. HRMS (ESI):  $m/z$   $[\text{M} + \text{H}]^+$  calcd for  $\text{C}_{24}\text{H}_{32}\text{NO}_3$ : 382.2382; found: 382.2373.

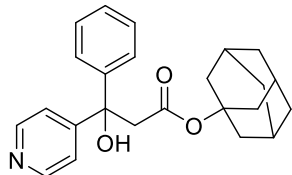

**Adamantan-1-yl 3-hydroxy-3-phenyl-3-(pyridin-4-yl)propanoate (3r)**

Following the *general procedure D*, when the reaction was finished after 4 h, the product **3r** was isolated by chromatography on silica gel (PE/EA = 1/1, eluent) as a light brown solid (61%, 46.0 mg).  $^1\text{H}$  NMR (400 MHz,  $\text{CDCl}_3$ )  $\delta$  8.56 (s, 2H), 7.43–7.38 (m, 4H), 7.31 (t,  $J = 7.5$  Hz, 2H), 7.24 (d,  $J = 7.0$  Hz, 1H), 5.27 (s, 1H), 3.20 – 3.10 (dd,  $J = 16.0, 22.0$  Hz, 2H), 2.10 (s, 3H), 1.95 (s, 6H), 1.60 (s, 6H).  $^{13}\text{C}$  NMR (101 MHz,  $\text{CDCl}_3$ )  $\delta$  171.31, 154.86, 149.68, 144.51, 128.38, 127.49, 125.51, 82.79, 75.78, 45.93, 41.08, 35.92, 30.72. HRMS (ESI):  $m/z$   $[\text{M} + \text{H}]^+$  calcd for  $\text{C}_{24}\text{H}_{28}\text{NO}_3$ : 378.2069; found: 378.2076.

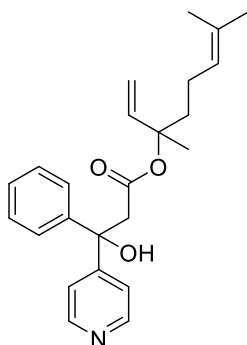

**3,7-dimethylocta-1,6-dien-3-yl 3-hydroxy-3-phenyl-3-(pyridin-4-yl)propanoate (3s)**

Following the *general procedure D*, when the reaction was finished after 4 h, the product **3s** was isolated by chromatography on silica gel (PE/EA = 1/1, eluent) as a Colorless oil (76%, 57.6 mg).  $^1\text{H}$  NMR (400 MHz,  $\text{CDCl}_3$ )  $\delta$  8.54 (s, 2H), 7.45 (d,  $J = 7.1$  Hz, 2H), 7.38 (s, 2H), 7.33 (t,  $J = 6.9$  Hz, 2H), 7.26 (d,  $J = 6.7$  Hz, 1H), 5.79 (dd,  $J = 17.1, 11.2$  Hz, 1H), 5.31 (s, 1H), 5.13 – 4.97 (m, 3H), 3.22 (q,  $J = 16.0$  Hz, 2H), 1.97 – 1.84 (m, 2H), 1.72 (d,  $J = 23.0$  Hz, 5H), 1.58 (s, 3H), 1.41 (s, 3H).  $^{13}\text{C}$  NMR (101 MHz,  $\text{CDCl}_3$ )  $\delta$  171.16, 154.65, 149.72, 144.35, 140.68, 131.99, 128.37, 127.51, 125.46, 123.28, 120.59, 113.60, 85.01, 75.67, 45.46, 39.81, 25.56, 23.08, 23.06, 22.12, 17.53. HRMS (ESI):  $m/z$   $[\text{M} + \text{H}]^+$  calcd for  $\text{C}_{24}\text{H}_{30}\text{NO}_3$ : 380.2226; found: 380.2228.

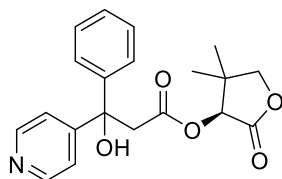

**(S)-4,4-dimethyl-2-oxotetrahydrofuran-3-yl 3-hydroxy-3-phenyl-3-(pyridin-4-yl)propanoate (3t)**

Following the *general procedure D*, when the reaction was finished after 4 h, the product **3t** was isolated by chromatography on silica gel (PE/EA = 1/1, eluent) as a white solid (49%, 34.8 mg). <sup>1</sup>H NMR (400 MHz, CDCl<sub>3</sub>) δ 8.56 (d, *J* = 4.4 Hz, 2H), 7.47 (d, *J* = 7.6 Hz, 2H), 7.41 (d, *J* = 5.0 Hz, 2H), 7.39 - 7.34 (m, 2H), 7.28 (t, *J* = 6.6 Hz, 1H), 5.32 (s, 1H), 4.88 (s, 1H), 4.01 (q, *J* = 9.1 Hz, 2H), 3.54 - 3.40 (m, 2H), 1.03 (d, *J* = 3.3 Hz, 3H), 0.97 (d, *J* = 11.9 Hz, 3H). <sup>13</sup>C NMR (101 MHz, CDCl<sub>3</sub>) δ 171.74, 170.94, 154.52, 149.81, 144.03, 128.69, 127.90, 125.46, 120.57, 77.32, 77.00, 76.68, 76.09, 75.69, 44.92, 40.16, 22.65, 19.70. HRMS (ESI): *m/z* [M + H]<sup>+</sup> calcd for C<sub>20</sub>H<sub>22</sub>NO<sub>5</sub>: 356.1498; found: 356.1500.

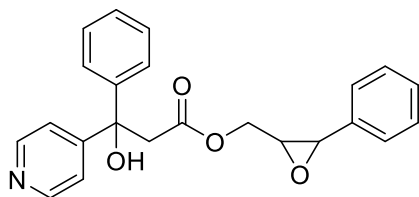

**(3-phenyloxiran-2-yl)methyl 3-hydroxy-3-phenyl-3-(pyridin-4-yl)propanoate (3u)**

Following the *general procedure D*, when the reaction was finished after 4 h, the product **3u** was isolated by chromatography on silica gel (PE/EA = 1/1, eluent) as a light yellow oil (42%, 158 mg, 1 mmol). <sup>1</sup>H NMR (400 MHz, CDCl<sub>3</sub>) δ 8.54 (d, *J* = 5.0 Hz, 2H), 7.45 (d, *J* = 7.8 Hz, 2H), 7.40 - 7.32 (m, 8H), 7.23 (d, *J* = 6.9 Hz, 2H), 5.09 (d, *J* = 3.6 Hz, 1H), 4.49 (t, *J* = 11.4 Hz, 1H), 4.15 - 4.07 (m, 1H), 3.71 (s, 1H), 3.37 (qd, *J* = 16.4, 4.4 Hz, 2H), 3.14 (s, 1H). <sup>13</sup>C NMR (101 MHz, CDCl<sub>3</sub>) δ 171.60, 154.69, 149.45, 144.11, 135.70, 128.44, 127.60, 125.50, 125.30, 125.27, 120.52, 120.50, 75.49, 64.44, 58.59, 56.22, 44.63. HRMS (ESI): *m/z* [M + H]<sup>+</sup> calcd for C<sub>23</sub>H<sub>22</sub>NO<sub>4</sub>: 376.1549; found: 376.1544.

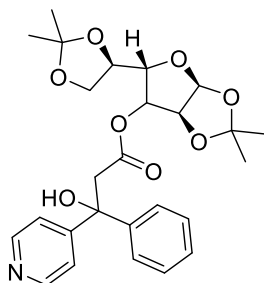

**(3aS,5S,6aS)-5-((R)-2,2-dimethyl-1,3-dioxolan-4-yl)-2,2-dimethyltetrahydrofuro[2,3-d][1,3]dioxol-6-yl 3-hydroxy-3-phenyl-3-(pyridin-4-yl)propanoate (3v)**

Following the *general procedure D*, when the reaction was finished after 4 h, the product **3v** was isolated by chromatography on silica gel (PE/EA = 1/1, eluent) as a brown oil (63%, 61.1 mg). <sup>1</sup>H NMR (400 MHz, CDCl<sub>3</sub>) δ 8.51 (s, 2H), 7.46 - 7.40 (t, *J* = 9.0 Hz, 2H), 7.39 - 7.29 (m, 4H), 7.26 (t, *J* = 8.0 Hz, 1H), 5.68 - 5.67 (m, 1H), 5.14 (dd, *J* = 10.5, 2.5 Hz, 1H), 4.96 (s, 1H), 4.14 - 4.02 (m, 3H), 4.02 - 3.92 (m, 2H), 3.40 - 3.19 (m, 2H), 1.45 (s, 3H), 1.36 (d, *J* = 4.0 Hz, 3H), 1.32 (s, 3H), 1.21 (d, *J* = 7.0 Hz, 3H). <sup>13</sup>C NMR (101 MHz, CDCl<sub>3</sub>) δ 170.88, 154.66, 149.68, 144.08, 128.57, 127.83, 125.58, 120.62, 112.32, 109.53, 104.92, 82.93, 79.42, 75.78, 72.29, 67.36, 45.21, 26.88, 26.53, 26.00, 25.18. HRMS (ESI): *m/z* [M + H]<sup>+</sup> calcd for C<sub>26</sub>H<sub>32</sub>NO<sub>8</sub>: 486.2128; found: 486.2130.

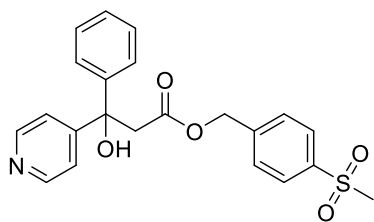

**4-(methylsulfonyl)benzyl 3-hydroxy-3-phenyl-3-(pyridin-4-yl)propanoate (3w)**

Following the *general procedure D*, when the reaction was finished after 4 h, the product **3w** was isolated by chromatography on silica gel (PE/EA = 1/1, eluent) as a yellow oil (57%, 46.9 mg).  $^1\text{H}$  NMR (400 MHz,  $\text{CDCl}_3$ )  $\delta$  8.55 – 8.48 (m, 2H), 7.90 (d,  $J$  = 7.8 Hz, 2H), 7.43 (d,  $J$  = 7.1 Hz, 2H), 7.35 (d,  $J$  = 11.1 Hz, 7H), 5.16 (d,  $J$  = 15.2 Hz, 2H), 4.99 (s, 1H), 3.47 – 3.27 (m, 2H), 3.08 (s, 3H).  $^{13}\text{C}$  NMR (101 MHz,  $\text{CDCl}_3$ )  $\delta$  171.79, 154.40, 149.75, 143.97, 141.02, 128.59, 127.83, 127.71, 125.37, 120.50, 75.67, 65.59, 44.79, 44.40. HRMS (ESI):  $m/z$   $[\text{M} + \text{H}]^+$  calcd for  $\text{C}_{22}\text{H}_{22}\text{NO}_5\text{S}$ : 412.1219; found: 412.1218.

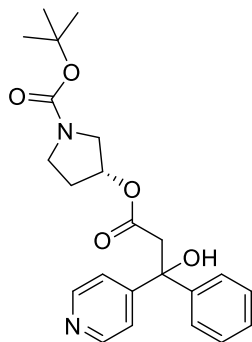

**tert-butyl (3R)-3-((3-hydroxy-3-phenyl-3-(pyridin-4-yl)propanoyl)oxy)pyrrolidine-1-carboxylate (3x)**

Following the *general procedure D*, when the reaction was finished after 4 h, the product **3x** was isolated by chromatography on silica gel (PE/EA = 1/1, eluent) as a white solid. (60%, 49.4 mg).  $^1\text{H}$  NMR (400 MHz,  $\text{CDCl}_3$ )  $\delta$  8.51 (d,  $J$  = 5.7 Hz, 2H), 7.40 (t,  $J$  = 6.1 Hz, 2H), 7.36 – 7.30 (m, 4H), 7.24 (t,  $J$  = 7.2 Hz, 1H), 5.22 (s, 1H), 5.06 (s, 1H), 3.51 – 3.38 (m, 2H), 3.33 – 3.27 (m, 2H), 3.23 – 3.16 (m, 2H), 1.95 (s, 1H), 1.78 (s, 1H), 1.46 (s, 9H).  $^{13}\text{C}$  NMR (101 MHz,  $\text{CDCl}_3$ )  $\delta$  171.81, 154.41, 154.16, 149.78, 144.04, 128.54, 127.73, 125.34, 120.43, 79.62, 75.68, 74.89, 51.52, 44.92, 43.69, 30.52, 28.41. HRMS (ESI):  $m/z$   $[\text{M} + \text{H}]^+$  calcd for  $\text{C}_{23}\text{H}_{29}\text{N}_2\text{O}_5$ : 413.2076; found: 413.2070.

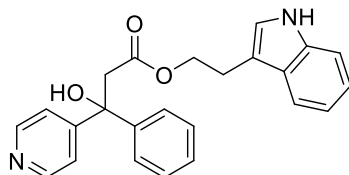

**2-(1H-indol-3-yl)ethyl 3-hydroxy-3-phenyl-3-(pyridin-4-yl)propanoate (3y)**

Following the *general procedure D*, when the reaction was finished after 4 h, the product **3y** was isolated by chromatography on silica gel (PE/EA = 1/1, eluent) as a white solid (72%, 55.6 mg).  $^1\text{H}$  NMR (400 MHz,  $\text{CDCl}_3$ )  $\delta$  8.57 (s, 1H), 8.49 (d,  $J$  = 5.4 Hz, 2H), 7.63 (d,  $J$  = 7.8 Hz, 1H), 7.39 (d,  $J$  = 7.4 Hz, 3H), 7.35 – 7.23 (m, 6H), 7.18 (t,  $J$  = 7.4 Hz, 1H), 6.93 (d,  $J$  = 2.0 Hz, 1H), 5.23 (s, 1H), 4.43 – 4.28 (m, 2H), 3.33 – 3.19 (m, 2H), 3.12 – 2.97 (m, 2H).  $^{13}\text{C}$  NMR (101 MHz,  $\text{CDCl}_3$ )  $\delta$  172.18, 154.80, 149.56, 144.23, 136.21, 128.46, 127.58, 127.23, 125.33, 122.08, 122.06, 120.60,

119.36, 118.57, 111.29, 111.27, 75.57, 65.29, 44.74, 24.48. HRMS (ESI):  $m/z$   $[M + H]^+$  calcd for  $C_{24}H_{23}N_2O_3$ : 387.1709; found: 387.1712.

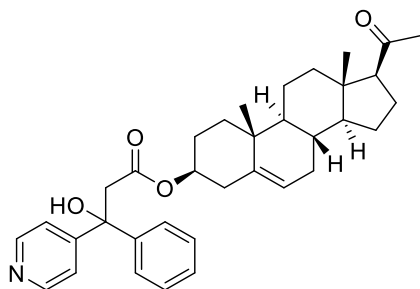

**(3S, 8S, 9S, 10R, 13S, 14S, 17S)-17-acetyl-10,13-dimethyl-2,3,4,7,8,9,10,11,12,13,14,15,16,17-tetradecahydro-1H-cyclopenta[a]phenanthren-3-yl-3-hydroxy-3-phenyl-3-(pyridin-4-yl)propanoate (3z)**

Following the *general procedure D*, when the reaction was finished after 4 h, the product **3z** was isolated by chromatography on silica gel (PE/EA = 1/1, eluent) as a white solid (47%, 50.9 mg).  $^1H$  NMR (400 MHz,  $CDCl_3$ )  $\delta$  8.56 (d,  $J$  = 3.7 Hz, 2H), 7.44 (d,  $J$  = 7.6 Hz, 2H), 7.41 (d,  $J$  = 5.6 Hz, 2H), 7.35 (t,  $J$  = 7.5 Hz, 2H), 7.28 (t,  $J$  = 6.5 Hz, 1H), 5.34 (d,  $J$  = 3.6 Hz, 1H), 5.25 (s, 1H), 4.62 – 4.56 (m, 1H), 3.25 (qd,  $J$  = 16.3, 2.4 Hz, 2H), 2.54 (t,  $J$  = 8.7 Hz, 1H), 2.22 (dd,  $J$  = 21.9, 11.2 Hz, 3H), 2.14 (s, 3H), 2.04 (d,  $J$  = 11.4 Hz, 1H), 1.88 – 1.81 (m, 1H), 1.75 – 1.65 (m, 3H), 1.60 (s, 2H), 1.47 (t,  $J$  = 8.2 Hz, 3H), 1.22 (dd,  $J$  = 30.6, 7.9 Hz, 2H), 1.11 (dd,  $J$  = 13.8, 3.9 Hz, 1H), 1.02 (s, 3H), 0.64 (s, 3H).  $^{13}C$  NMR (101 MHz,  $CDCl_3$ )  $\delta$  209.52, 171.78, 154.98, 149.55, 144.26, 139.01, 128.49, 127.67, 125.43, 122.80, 120.69, 75.73, 75.01, 63.59, 56.72, 49.74, 44.98, 43.91, 38.68, 37.66, 36.76, 36.48, 31.70, 31.52, 27.42, 24.42, 22.76, 20.95, 19.21, 13.18. HRMS (ESI):  $m/z$   $[M + H]^+$  calcd for  $C_{35}H_{44}NO_4$ : 542.3270; found: 542.3264.

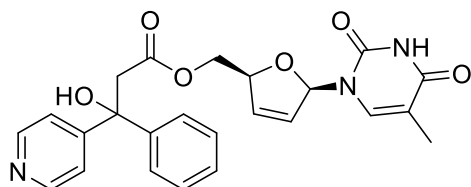

**(2R,5R)-5-(5-methyl-2,4-dioxo-3,4-dihydropyrimidin-1(2H)-yl)-2,5-dihydrofuran-2-yl 3-hydroxy-3-phenyl-3-(pyridin-4-yl)propanoate (3aa)**

Following the *general procedure D*, when the reaction was finished after 8 h, the product **3aa** was isolated by chromatography on silica gel (DCM/MeOH = 10/1, eluent) as a yellow oil (45%, 39.2 mg).  $^1H$  NMR (400 MHz,  $CDCl_3$ )  $\delta$  9.27 (d,  $J$  = 16.6 Hz, 1H), 8.68 – 8.49 (m, 2H), 7.48 – 7.38 (m, 4H), 7.38 – 7.31 (m, 2H), 7.29 – 7.23 (m, 1H), 7.06 (t,  $J$  = 1.8 Hz, 1H), 6.99 (dt,  $J$  = 3.4, 1.6 Hz, 1H), 6.16 (td,  $J$  = 4.1, 2.0 Hz, 1H), 5.92 (dq,  $J$  = 6.0, 2.0 Hz, 1H), 5.12 – 4.89 (m, 2H), 4.33 (ddd,  $J$  = 13.1, 7.9, 5.5 Hz, 1H), 4.24 (ddd,  $J$  = 11.8, 7.4, 3.4 Hz, 1H), 3.41 – 3.23 (m, 2H), 1.84 (s, 3H).  $^{13}C$  NMR (101 MHz,  $CDCl_3$ )  $\delta$  171.70, 163.57, 150.74, 148.75, 135.08, 132.66, 128.76, 128.03, 127.69, 125.33, 120.93, 111.21, 90.10, 83.65, 75.69, 65.48, 44.70, 12.58. HRMS (ESI):  $m/z$   $[M + H]^+$  calcd for  $C_{24}H_{24}N_3O_6$ : 450.1665; found: 450.1654.

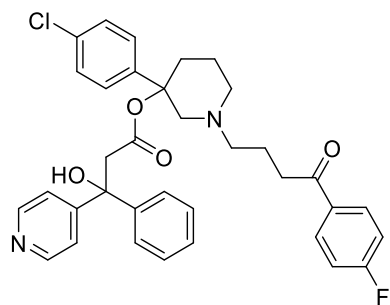

**3-(4-chlorophenyl)-1-(4-(4-fluorophenyl)-4-oxobutyl)piperidin-3-yl-3-hydroxy-3-phenyl-3-(pyridin-4-yl)propanoate. (3ab)**

Following the *general procedure D*, when the reaction was finished after 6 h, the product **3ab** was isolated by chromatography on silica gel (DCM/MeOH = 10/1, eluent) as a light yellow solid (38%, 45.6 mg).  $^1\text{H}$  NMR (400 MHz,  $\text{CDCl}_3$ )  $\delta$  8.55 (d,  $J$  = 4.3 Hz, 2H), 8.13 – 7.94 (m, 2H), 7.43 (d,  $J$  = 7.3 Hz, 2H), 7.36 (d,  $J$  = 5.6 Hz, 4H), 7.30 (d,  $J$  = 9.3 Hz, 2H), 7.20 (d,  $J$  = 7.8 Hz, 2H), 7.14 (t,  $J$  = 8.1 Hz, 2H), 7.02 (d,  $J$  = 8.0 Hz, 2H), 5.07 (s, 1H), 3.43 – 3.17 (m, 2H), 2.99 (t,  $J$  = 6.5 Hz, 2H), 2.72 (d,  $J$  = 10.5 Hz, 2H), 2.43 (t,  $J$  = 6.4 Hz, 2H), 2.31 (d,  $J$  = 13.4 Hz, 2H), 2.12 (q,  $J$  = 10.5 Hz, 2H), 2.01 – 1.94 (m, 2H), 1.93 – 1.83 (m, 2H).  $^{13}\text{C}$  NMR (101 MHz,  $\text{CDCl}_3$ )  $\delta$  198.19, 170.86, 154.48, 149.92, 144.18, 133.37, 130.66, 130.56, 128.62, 128.59, 127.76, 125.78, 125.56, 120.63, 115.74, 115.52, 82.19, 75.62, 57.51, 48.93, 48.85, 45.39, 36.08, 35.29, 35.20, 21.79. HRMS (ESI):  $m/z$   $[\text{M} + \text{H}]^+$  calcd for  $\text{C}_{35}\text{H}_{35}\text{ClFN}_2\text{O}_4$ : 601.2269; found: 601.2273.

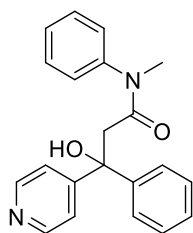

**3-hydroxy-N-methyl-N, 3-diphenyl-3-(pyridin-4-yl)propanamide. (3ac)**

Following the *general procedure D*, when the reaction was finished after 4 h, the product **3ac** was isolated by chromatography on silica gel (PE/EA = 1/1, eluent) as a yellow oil (54%, 35.9 mg).  $^1\text{H}$  NMR (400 MHz,  $\text{CDCl}_3$ )  $\delta$  8.50 (d,  $J$  = 5.0 Hz, 2H), 7.48 (t,  $J$  = 7.2 Hz, 2H), 7.42 (t,  $J$  = 7.2 Hz, 1H), 7.29 – 7.26 (m, 4H), 7.23 – 7.21 (m, 3H), 7.10 (d,  $J$  = 7.9 Hz, 2H), 6.92 (s, 1H), 3.16 (s, 3H), 2.96 (s, 2H).  $^{13}\text{C}$  NMR (101 MHz,  $\text{CDCl}_3$ )  $\delta$  171.69, 155.33, 149.55, 144.80, 142.60, 130.15, 128.54, 128.28, 127.33, 126.87, 125.47, 120.77, 76.26, 42.66, 37.11.

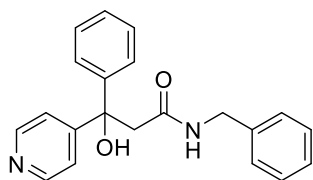

**N-benzyl-3-hydroxy-3-phenyl-3-(pyridin-4-yl)propanamide (3ad)**

Following the *general procedure D*, when the reaction was finished after 4 h, the product **3ad** was isolated by chromatography on silica gel (PE/EA = 1/1, eluent) as a yellow oil (43%, 28.6 mg).  $^1\text{H}$  NMR (400 MHz,  $\text{CDCl}_3$ )  $\delta$  8.39 (d,  $J$  = 6.1 Hz, 2H), 7.39 (d,  $J$  = 6.8 Hz, 2H), 7.34 – 7.27 (m, 5H), 7.22 – 7.21 (m, 3H), 6.91 – 6.89 (m, 2H), 6.80 (t,  $J$  = 5.6 Hz, 1H), 4.29 (dd,  $J$  = 5.7, 2.4 Hz, 2H), 3.11 (q,  $J$  = 15.1 Hz, 2H).  $^{13}\text{C}$  NMR (101 MHz,  $\text{CDCl}_3$ )  $\delta$  171.25, 155.29, 149.43, 144.48, 137.29,

128.63, 128.50, 127.57, 127.51, 127.33, 125.52, 120.90, 76.08, 45.35, 43.17. HRMS (ESI):  $m/z$   $[M + H]^+$  calcd for  $C_{21}H_{21}N_2O_2$ : 333.1603; found: 333.1606.

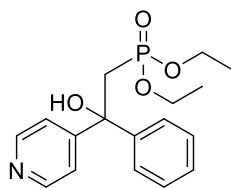

**Diethyl (2-hydroxy-2-phenyl-2-(pyridin-4-yl)ethyl)phosphonate (3ae)**

Following the *general procedure D*, when the reaction was finished after 4 h, the product **3ae** was isolated by chromatography on silica gel (DCM/MeOH = 15/1, eluent) as a yellow oil (65%, 43.6 mg).  $^1H$  NMR (400 MHz,  $CDCl_3$ )  $\delta$  8.52 (d,  $J$  = 5.4 Hz, 2H), 7.48 (d,  $J$  = 7.7 Hz, 2H), 7.41 (d,  $J$  = 5.4 Hz, 2H), 7.32 (t,  $J$  = 7.5 Hz, 2H), 7.24 (d,  $J$  = 7.1 Hz, 1H), 5.88 (s, 1H), 3.90 – 3.82 (m, 2H), 3.76 – 3.62 (m, 2H), 2.89 – 2.75 (m, 2H), 1.13 (t,  $J$  = 7.1 Hz, 6H).  $^{13}C$  NMR (101 MHz,  $CDCl_3$ )  $\delta$  155.19, 149.65, 144.88, 128.34, 127.49, 125.47, 120.64, 74.72, 62.12, 61.87, 38.17, 36.80, 16.09.  $^{31}P$  NMR (162 MHz,  $CDCl_3$ )  $\delta$  28.00. HRMS (ESI):  $m/z$   $[M + H]^+$  calcd for  $C_{17}H_{23}NO_4P$ : 336.1365; found: 336.1367.

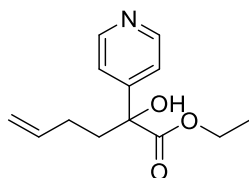

**Ethyl 2-hydroxy-2-(pyridin-4-yl)hex-5-enoate (3af)**

Following the *general procedure D*, when the reaction was finished after 2.5 h, the product **3af** was isolated by chromatography on silica gel (PE/EA = 1/1, eluent) as a yellow oil (50%, 23. mg).  $^1H$  NMR (400 MHz,  $CDCl_3$ )  $\delta$  8.57 (d,  $J$  = 5.8 Hz, 2H), 7.54 (d,  $J$  = 5.9 Hz, 2H), 5.81 – 5.72 (m, 1H), 5.02 – 4.93 (m, 2H), 4.32 – 4.16 (m, 3H), 2.25 – 2.03 (m, 5H), 1.28 (t,  $J$  = 7.1 Hz, 3H).  $^{13}C$  NMR (101 MHz,  $CDCl_3$ )  $\delta$  173.95, 150.74, 149.67, 137.28, 120.71, 115.26, 63.07, 38.87, 27.90, 14.02. HRMS (ESI):  $m/z$   $[M + H]^+$  calcd for  $C_{13}H_{18}NO_3$ : 236.1287; found: 236.1286.

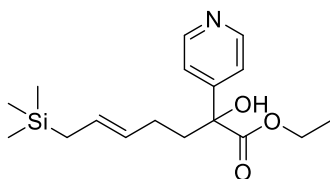

**Ethyl 2-hydroxy-2-(pyridin-4-yl)-7-(trimethylsilyl)hept-5-enoate (3ag)**

Following the *general procedure D*, when the reaction was finished after 2.5 h, the product **3ag** was isolated by chromatography on silica gel (PE/EA = 1/1, eluent) as a brown yellow oil (48%, 30.8 mg).  $^1H$  NMR (400 MHz,  $CDCl_3$ )  $\delta$  8.56 (dd,  $J$  = 4.4, 2.0 Hz, 2H), 7.53 (dd,  $J$  = 4.5, 2.2 Hz, 2H), 5.47 – 5.30 (m, 1H), 5.19 (dd,  $J$  = 13.2, 6.8 Hz, 1H), 4.24 (ddtt,  $J$  = 12.9, 10.6, 6.8, 2.9 Hz, 3H), 2.27 – 2.09 (m, 1H), 2.09 – 1.87 (m, 3H), 1.38 (dd,  $J$  = 17.0, 7.9 Hz, 2H), 1.27 (td,  $J$  = 7.1, 2.3 Hz, 3H), -0.06 (s, 9H).  $^{13}C$  NMR (101 MHz,  $CDCl_3$ )  $\delta$  150.91, 149.57, 127.34, 126.96, 120.68, 77.47, 62.83, 40.12, 27.01, 22.59, 13.99, -2.07. HRMS (ESI):  $m/z$   $[M + H]^+$  calcd for  $C_{17}H_{28}NO_3Si$ : 322.1838; found: 322.1833.

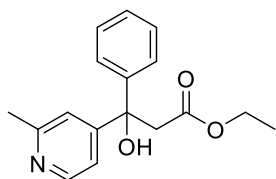

#### Ethyl 3-hydroxy-3-(2-methylpyridin-4-yl)-3-phenylpropanoate (3ah)

Following the *general procedure D*, when the reaction was finished after 4 h, the product **3ah** was isolated by chromatography on silica gel (PE/EA = 1/1, eluent) as a white solid (56%, 31.9 mg).  $^1\text{H}$  NMR (400 MHz,  $\text{CDCl}_3$ )  $\delta$  8.43 (d,  $J$  = 4.5 Hz, 1H), 7.44 (d,  $J$  = 7.4 Hz, 2H), 7.33 (d,  $J$  = 7.4 Hz, 2H), 7.28 (s, 2H), 7.15 (d,  $J$  = 3.1 Hz, 1H), 5.20 (s, 1H), 4.17 – 4.04 (m, 2H), 3.25 (q,  $J$  = 16.4 Hz, 2H), 2.54 (s, 3H), 1.19 (t,  $J$  = 6.7 Hz, 3H).  $^{13}\text{C}$  NMR (101 MHz,  $\text{CDCl}_3$ )  $\delta$  172.38, 158.59, 154.93, 149.11, 144.48, 128.44, 127.54, 125.39, 120.01, 117.65, 75.64, 75.64, 61.19, 44.73, 24.55, 13.94. HRMS (ESI):  $m/z$   $[\text{M} + \text{H}]^+$  calcd for  $\text{C}_{17}\text{H}_{20}\text{NO}_3$ : 286.1443; found: 286.1435.

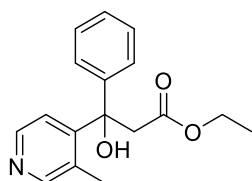

#### Ethyl 3-hydroxy-3-(3-methylpyridin-4-yl)-3-phenylpropanoate (3ai)

Following the *general procedure D*, when the reaction was finished after 4 h, the product **3ai** was isolated by chromatography on silica gel (PE/EA = 1/1, eluent) as a light yellow oil (50%, 28.5 mg).  $^1\text{H}$  NMR (400 MHz,  $\text{CDCl}_3$ )  $\delta$  8.46 (d,  $J$  = 4.2 Hz, 1H), 8.32 (s, 1H), 7.34 – 7.30 (m, 6H), 5.36 (s, 1H), 4.24 – 4.11 (m, 2H), 3.33 (d,  $J$  = 16.3 Hz, 1H), 3.07 (d,  $J$  = 16.3 Hz, 1H), 2.09 (s, 3H), 1.23 (t,  $J$  = 7.0 Hz, 3H).  $^{13}\text{C}$  NMR (101 MHz,  $\text{CDCl}_3$ )  $\delta$  172.82, 153.19, 151.16, 147.10, 143.73, 132.92, 128.23, 127.40, 125.59, 119.95, 76.91, 61.35, 45.40, 18.21, 13.98. HRMS (ESI):  $m/z$   $[\text{M} + \text{H}]^+$  calcd for  $\text{C}_{17}\text{H}_{20}\text{NO}_3$ : 286.1443; found: 286.1440.

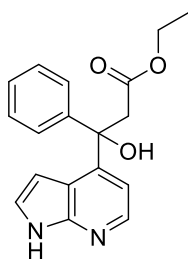

#### Ethyl 3-hydroxy-3-phenyl-3-(1H-pyrrolo[2,3-b]pyridin-4-yl)propanoate (3aj)

Following the *general procedure D*, when the reaction was finished after 5 h, the product **3aj** was isolated by chromatography on silica gel (PE/EA = 1/1, eluent) as a yellow oil (65%, 40.3 mg).  $^1\text{H}$  NMR (400 MHz,  $\text{CDCl}_3$ )  $\delta$  11.34 (s, 1H), 8.27 (d,  $J$  = 4.3 Hz, 1H), 7.52 (d,  $J$  = 7.6 Hz, 2H), 7.33 (t,  $J$  = 7.5 Hz, 2H), 7.29 – 7.24 (m, 2H), 7.17 (d,  $J$  = 5.0 Hz, 1H), 6.62 (d,  $J$  = 3.2 Hz, 1H), 5.41 (s, 1H), 4.12 (q,  $J$  = 7.1 Hz, 2H), 3.53 (d,  $J$  = 16.2 Hz, 1H), 3.39 (d,  $J$  = 16.2 Hz, 1H), 1.16 (t,  $J$  = 7.1 Hz, 3H).  $^{13}\text{C}$  NMR (101 MHz,  $\text{CDCl}_3$ )  $\delta$  172.71, 149.39, 147.17, 144.58, 141.88, 128.18, 127.36, 125.70, 124.84, 117.86, 112.33, 101.66, 76.94, 61.06, 44.75, 13.91. HRMS (ESI):  $m/z$   $[\text{M} + \text{H}]^+$  calcd for  $\text{C}_{18}\text{H}_{19}\text{N}_2\text{O}_3$ : 311.1396; found: 311.1400.

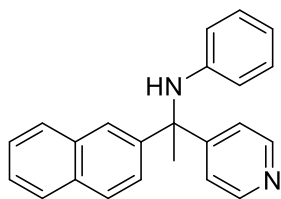

**N-(1-(naphthalen-2-yl)-1-(pyridin-4-yl)ethyl)aniline (3ak)**

Following the *general procedure D*, when the reaction was finished after 4 h, the product **3ak** was isolated by chromatography on silica gel (PE/EA = 1/1, eluent) as a yellow oil (68%, 44.1 mg). <sup>1</sup>H NMR (400 MHz, Chloroform-*d*)  $\delta$  8.58 (d, *J* = 5.0 Hz, 2H), 7.90 – 7.78 (m, 4H), 7.59 (d, *J* = 8.7 Hz, 1H), 7.54 – 7.41 (m, 4H), 7.05 (t, *J* = 7.6 Hz, 2H), 6.71 (t, *J* = 7.2 Hz, 1H), 6.47 (d, *J* = 8.0 Hz, 2H), 4.44 (s, 1H), 2.20 (s, 3H). <sup>13</sup>C NMR (101 MHz, Chloroform-*d*)  $\delta$  155.36, 150.10, 145.25, 142.88, 133.04, 132.37, 128.79, 128.60, 128.26, 127.44, 126.36, 125.16, 124.86, 122.03, 118.32, 116.30, 62.13, 26.24.

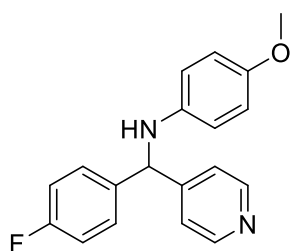

**N-((4-fluorophenyl)(pyridin-4-yl)methyl)-4-methoxyaniline (3al)**

Following the *general procedure D*, when the reaction was finished after 4 h, the product **3al** was isolated by chromatography on silica gel (PE/EA = 1/1, eluent) as a yellow oil (40%, 24.6 mg). <sup>1</sup>H NMR (400 MHz, Chloroform-*d*)  $\delta$  8.59 (d, *J* = 5.0 Hz, 2H), 7.36 – 7.29 (m, 4H), 7.06 (d, *J* = 8.3 Hz, 2H), 6.75 (d, *J* = 8.7 Hz, 2H), 6.49 (d, *J* = 8.5 Hz, 2H), 5.39 (s, 1H), 3.95 (s, 1H), 3.74 (s, 3H). <sup>13</sup>C NMR (101 MHz, Chloroform-*d*)  $\delta$  162.32 (d, *J*<sub>C-F</sub> = 248.2 Hz), 152.68, 151.70, 150.28, 140.73, 137.55, 129.23 (d, *J*<sub>C-F</sub> = 8.1 Hz), 122.24, 116.03, 115.81, 114.83, 114.81, 62.38, 55.69. <sup>19</sup>F NMR (376 MHz, Chloroform-*d*)  $\delta$  -113.93.

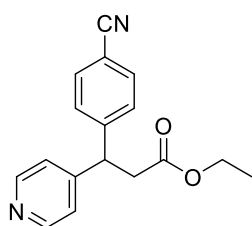

**Ethyl 3-(4-cyanophenyl)-3-(pyridin-4-yl)propanoate (3am)**

Following the *general procedure D*, when the reaction was finished after 4 h, the product **3am** was isolated by chromatography on silica gel (PE/EA = 1/1, eluent) as a yellow oil (73%, 40.9 mg). <sup>1</sup>H NMR (400 MHz, CDCl<sub>3</sub>)  $\delta$  8.51 (d, *J* = 4.4 Hz, 2H), 7.58 (d, *J* = 8.0 Hz, 2H), 7.32 (d, *J* = 7.9 Hz, 2H), 7.11 (d, *J* = 4.7 Hz, 2H), 4.56 (t, *J* = 7.8 Hz, 1H), 4.03 (q, *J* = 7.0 Hz, 2H), 3.09 – 2.95 (m, 2H), 1.11 (t, *J* = 7.1 Hz, 3H). <sup>13</sup>C NMR (101 MHz, CDCl<sub>3</sub>)  $\delta$  170.46, 150.62, 150.17, 146.97, 132.54, 128.52, 122.72, 118.36, 111.12, 60.89, 46.22, 39.31, 13.95. HRMS (ESI): *m/z* [M + H]<sup>+</sup> calcd for C<sub>17</sub>H<sub>17</sub>N<sub>2</sub>O<sub>2</sub>: 281.1290; found: 281.1287.

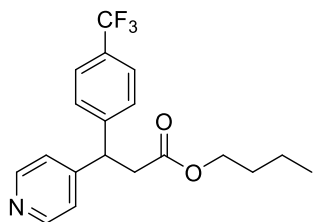

### Butyl 3-(pyridin-4-yl)-3-(4-(trifluoromethyl)phenyl)propanoate (**3an**)

Following the *general procedure D*, when the reaction was finished after 4 h, the product **3an** was isolated by chromatography on silica gel (PE/EA = 1/1, eluent) as a yellow oil (73%, 51.2 mg). <sup>1</sup>H NMR (400 MHz, CDCl<sub>3</sub>) δ 8.51 (d, *J* = 5.8 Hz, 2H), 7.55 (d, *J* = 8.2 Hz, 2H), 7.32 (d, *J* = 8.1 Hz, 2H), 7.13 (d, *J* = 6.4 Hz, 2H), 4.57 (t, *J* = 7.9 Hz, 1H), 3.98 (t, *J* = 6.6 Hz, 2H), 3.19 – 2.94 (m, 2H), 1.49 – 1.42 (m, 2H), 1.25 – 1.15 (m, 2H), 0.83 (t, *J* = 7.4 Hz, 3H). <sup>13</sup>C NMR (101 MHz, CDCl<sub>3</sub>) δ 170.82, 151.17, 150.11, 145.63, 129.41 (q, *J* = 3.7 Hz), 128.08, 125.72 (q, *J* = 3.7 Hz), 123.89 (d, *J* = 270 Hz), 122.78, 64.71, 46.13, 39.59, 30.38, 18.86, 13.46. <sup>19</sup>F NMR (376 MHz, CDCl<sub>3</sub>) δ -62.58. HRMS (ESI): *m/z* [M + H]<sup>+</sup> calcd for C<sub>19</sub>H<sub>21</sub>F<sub>3</sub>NO<sub>2</sub>: 352.1524; found: 352.1518.

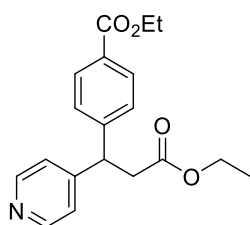

### Ethyl 4-(3-ethoxy-3-oxo-1-(pyridin-4-yl)propyl)benzoate (**3ao**)

Following the *general procedure D*, when the reaction was finished after 4 h, the product **3ao** was isolated by chromatography on silica gel (PE/EA = 1/1, eluent) as a yellow oil (84%, 54.9 mg). <sup>1</sup>H NMR (400 MHz, CDCl<sub>3</sub>) δ 8.51 (d, *J* = 3.6 Hz, 2H), 7.98 (d, *J* = 7.7 Hz, 2H), 7.29 (d, *J* = 7.5 Hz, 2H), 7.15 (d, *J* = 4.0 Hz, 2H), 4.58 (t, *J* = 7.5 Hz, 1H), 4.35 (dd, *J* = 13.5, 6.6 Hz, 2H), 4.05 (dd, *J* = 13.5, 6.6 Hz, 2H), 3.06 (d, *J* = 6.4 Hz, 2H), 1.36 (t, *J* = 6.8 Hz, 3H), 1.13 (t, *J* = 6.9 Hz, 3H). <sup>13</sup>C NMR (101 MHz, CDCl<sub>3</sub>) δ 170.75, 166.05, 151.36, 150.02, 146.59, 129.99, 129.37, 127.66, 122.80, 60.82, 60.75, 46.22, 39.54, 14.21, 13.96. HRMS (ESI): *m/z* [M + H]<sup>+</sup> calcd for C<sub>19</sub>H<sub>22</sub>NO<sub>4</sub>: 328.1549; found: 328.1544.

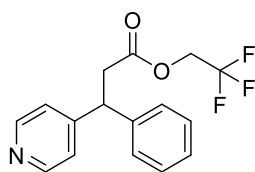

### 2,2,2-trifluoroethyl 3-phenyl-3-(pyridin-4-yl)propanoate (**3ap**)

Following the *general procedure D*, when the reaction was finished after 4 h, the product **3ap** was isolated by chromatography on silica gel (PE/EA = 1/1, eluent) as a yellow oil (85%, 52.5 mg). <sup>1</sup>H NMR (400 MHz, CDCl<sub>3</sub>) δ 8.54 (d, *J* = 5.0 Hz, 2H), 7.34 (t, *J* = 7.3 Hz, 2H), 7.28 (d, *J* = 7.1 Hz, 1H), 7.23 (d, *J* = 7.6 Hz, 2H), 7.18 (d, *J* = 5.0 Hz, 2H), 4.55 (t, *J* = 7.9 Hz, 1H), 4.40 (q, *J* = 8.3 Hz, 2H), 3.27 – 3.14 (m, 2H). <sup>13</sup>C NMR (101 MHz, CDCl<sub>3</sub>) δ 169.56, 151.49, 150.11, 141.01, 128.92, 127.53, 127.36, 122.74, 60.40 (q, *J* = 37 Hz), 46.14, 39.21. <sup>19</sup>F NMR (376 MHz, CDCl<sub>3</sub>) δ -73.80. HRMS (ESI): *m/z* [M + H]<sup>+</sup> calcd for C<sub>16</sub>H<sub>15</sub>F<sub>3</sub>NO<sub>2</sub>: 310.1055; found: 310.1062.

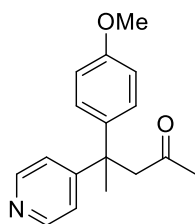

**4-(4-methoxyphenyl)-4-(pyridin-4-yl)pentan-2-one (3aq)**

Following the *general procedure D*, when the reaction was finished after 4 h, the product **3aq** was isolated by chromatography on silica gel (PE/EA = 1/1, eluent) as a white solid (56%, 30.2 mg). <sup>1</sup>H NMR (400 MHz, CDCl<sub>3</sub>) δ 8.60 – 8.45 (m, 2H), 7.17 – 7.02 (m, 4H), 6.91 – 6.79 (m, 2H), 3.81 (s, 3H), 3.34 – 3.12 (m, 2H), 1.85 (s, 3H), 1.80 (s, 3H). <sup>13</sup>C NMR (101 MHz, CDCl<sub>3</sub>) δ 206.63, 158.20, 158.11, 149.56, 128.05, 122.20, 113.73, 55.21, 53.64, 44.66, 31.97, 27.22. HRMS (ESI): m/z [M + Na]<sup>+</sup> calcd for C<sub>17</sub>H<sub>19</sub>NONa: 292.1313; found: 292.1305.

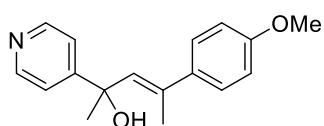

**(E)-4-(4-methoxyphenyl)-2-(pyridin-4-yl)pent-3-en-2-ol (3aq')**

Following the *general procedure D*, when the reaction was finished after 4 h, the product **3aq'** was isolated by chromatography on silica gel (PE/EA = 1/1, eluent) as a yellow oil (14%, 7.5 mg). <sup>1</sup>H NMR (400 MHz, CDCl<sub>3</sub>) δ 8.59 – 8.52 (m, 2H), 7.49 – 7.42 (m, 2H), 7.33 (d, *J* = 8.8 Hz, 2H), 6.86 (d, *J* = 8.8 Hz, 2H), 6.18 (d, *J* = 1.3 Hz, 1H), 3.82 (s, 3H), 2.24 (s, 1H), 1.85 (s, 3H), 1.68 (s, 3H). <sup>13</sup>C NMR (101 MHz, CDCl<sub>3</sub>) δ 149.47, 140.81, 135.59, 131.96, 126.91, 120.39, 113.68, 73.33, 55.32, 34.40, 17.52.

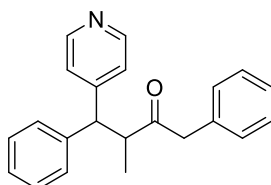

**3-methyl-1,4-diphenyl-4-(pyridin-4-yl)butan-2-one (3ar)**

Following the *general procedure D*, when the reaction was finished after 4 h, the product **3ar** was isolated by chromatography on silica gel (PE/EA = 1/1, eluent) as a yellow solid (58%, 36.6 mg). <sup>1</sup>H NMR (400 MHz, CDCl<sub>3</sub>) δ 8.52 (d, *J* = 6.0 Hz, 2H), 7.32 – 7.26 (m, 3H), 7.26 – 7.20 (m, 5H), 7.19 – 7.16 (m, 2H), 6.94 (dd, *J* = 7.1, 2.0 Hz, 2H), 4.13 (d, *J* = 11.5 Hz, 1H), 3.69 – 3.57 (m, 1H), 3.52 (s, 2H), 1.05 (d, *J* = 6.8 Hz, 3H). <sup>13</sup>C NMR (101 MHz, CDCl<sub>3</sub>) δ 210.02, 151.19, 150.00, 141.29, 133.25, 129.52, 128.81, 128.60, 127.77, 127.03, 126.99, 123.51, 54.14, 50.22, 48.62, 16.71. HRMS (ESI): m/z [M + H]<sup>+</sup> calcd for C<sub>22</sub>H<sub>22</sub>NO: 316.1701; found: 316.1697.

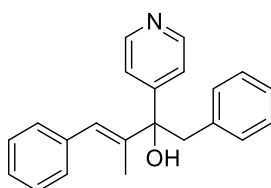

**(E)-3-methyl-1,4-diphenyl-2-(pyridin-4-yl)but-3-en-2-ol. Light yellow solid (3ar')**

Following the *general procedure D*, when the reaction was finished after 4 h, the product **3ar'** was isolated by chromatography on silica gel (PE/EA = 1/1, eluent) as a yellow oil (14%, 8.8 mg).  $^1\text{H}$  NMR (400 MHz,  $\text{CDCl}_3$ )  $\delta$  8.60 – 8.52 (m, 2H), 7.40 – 7.33 (m, 4H), 7.30 – 7.23 (m, 6H), 7.02 – 6.99 (m, 2H), 6.81 (s, 1H), 3.55 (d,  $J$  = 13.2 Hz, 1H), 3.42 (d,  $J$  = 13.2 Hz, 1H), 2.61 (s, 1H), 1.77 (s, 3H).  $^{13}\text{C}$  NMR (101 MHz,  $\text{CDCl}_3$ )  $\delta$  149.40, 140.66, 135.12, 130.64, 128.99, 128.24, 128.14, 127.07, 126.70, 126.08, 121.31, 78.61, 44.97, 15.14.

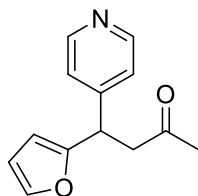

**4-(furan-2-yl)-4-(pyridin-4-yl)butan-2-one (3as)**

Following the *general procedure D*, when the reaction was finished after 4 h, the product **3as** was isolated by chromatography on silica gel (PE/EA = 1/1, eluent) as a yellow oil (55%, 23.7 mg).  $^1\text{H}$  NMR (400 MHz,  $\text{CDCl}_3$ )  $\delta$  8.58 – 8.45 (m, 2H), 7.35 (d,  $J$  = 1.9 Hz, 1H), 7.20 (s, 1H), 7.18 – 7.12 (m, 2H), 6.17 (d,  $J$  = 1.7 Hz, 1H), 4.44 (t,  $J$  = 7.2 Hz, 1H), 3.15 – 2.96 (m, 2H), 2.12 (s, 3H).  $^{13}\text{C}$  NMR (101 MHz,  $\text{CDCl}_3$ )  $\delta$  205.55, 152.23, 150.03, 143.53, 139.15, 126.51, 122.95, 109.91, 48.96, 36.46, 30.53. HRMS (ESI):  $m/z$   $[\text{M} + \text{H}]^+$  calcd for  $\text{C}_{13}\text{H}_{14}\text{NO}_2$ : 216.1025; found: 216.1030.

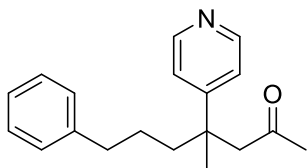

**4-methyl-7-phenyl-4-(pyridin-4-yl)heptan-2-one (3at)**

Following the *general procedure D*, when the reaction was finished after 4 h, the product **3at** was isolated by chromatography on silica gel (PE/EA = 1/1, eluent) as a light yellow oil (53%, 29.8 mg).  $^1\text{H}$  NMR (400 MHz,  $\text{CDCl}_3$ )  $\delta$  8.53 (d,  $J$  = 5.6 Hz, 2H), 7.28 (d,  $J$  = 5.1 Hz, 2H), 7.20 (d,  $J$  = 7.2 Hz, 1H), 7.17 (d,  $J$  = 6.0 Hz, 2H), 7.09 (d,  $J$  = 7.3 Hz, 2H), 2.91 (d,  $J$  = 16.1 Hz, 1H), 2.68 (d,  $J$  = 16.1 Hz, 1H), 2.59 – 2.50 (dd,  $J$  = 15.3, 8.2 Hz, 2H), 1.94 (s, 3H), 1.75 (ddd,  $J$  = 21.4, 12.3, 4.4 Hz, 2H), 1.55 – 1.47 (m, 1H), 1.45 (s, 3H), 1.30 – 1.22 (m, 1H).  $^{13}\text{C}$  NMR (101 MHz,  $\text{CDCl}_3$ )  $\delta$  206.37, 149.50, 128.30, 125.86, 121.45, 54.59, 41.90, 40.12, 36.02, 31.75, 25.68, 23.20. HRMS (ESI):  $m/z$   $[\text{M} + \text{H}]^+$  calcd for  $\text{C}_{19}\text{H}_{24}\text{NO}$ : 282.1858; found: 282.1852.

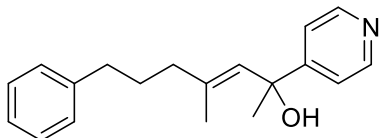

**(E)-4-methyl-7-phenyl-2-(pyridin-4-yl)hept-3-en-2-ol (3at')**

Following the *general procedure D*, when the reaction was finished after 4 h, the product **3at'** was isolated by chromatography on silica gel (PE/EA = 1/1, eluent) as a light yellow oil (13%, 7.3 mg).  $^1\text{H}$  NMR (400 MHz,  $\text{CDCl}_3$ )  $\delta$  8.55 (s, 2H), 7.42 (d,  $J$  = 5.3 Hz, 2H), 7.31 (t,  $J$  = 7.4 Hz, 2H), 7.20 (t,  $J$  = 6.2 Hz, 3H), 5.73 (s, 1H), 2.65 – 2.59 (m, 2H), 2.12 – 2.04 (m, 3H), 1.79 – 1.73 (m, 2H), 1.59 (s, 3H), 1.46 (s, 3H).  $^{13}\text{C}$  NMR (101 MHz,  $\text{CDCl}_3$ )  $\delta$  158.25, 149.26, 142.30, 142.18, 131.07, 128.38, 128.33, 125.81, 73.03, 39.90, 35.54, 34.09, 29.60, 17.64.

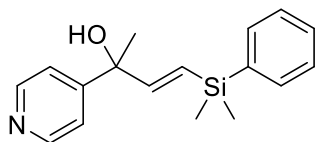

**(E)-4-(dimethyl(phenyl)silyl)-2-(pyridin-4-yl)but-3-en-2-ol (3au)**

Following the *general procedure D*, when the reaction was finished after 4 h, the product **3au** was isolated by chromatography on silica gel (PE/EA = 1/1, eluent) as a yellow solid (82%, 46.4 mg). <sup>1</sup>H NMR (400 MHz, CDCl<sub>3</sub>) δ 8.46 (d, *J* = 6.0 Hz, 2H), 7.48 – 7.46 (m, 2H), 7.36 – 7.31 (m, 5H), 6.33 (d, *J* = 18.4 Hz, 1H), 6.10 (d, *J* = 18.4 Hz, 1H), 3.71 (s, 1H), 1.62 (s, 3H), 0.34 (s, 6H). <sup>13</sup>C NMR (101 MHz, CDCl<sub>3</sub>) δ 155.83, 151.99, 149.31, 138.03, 133.71, 129.08, 127.79, 125.66, 120.42, 77.32, 74.76, 29.04, -2.70, -2.72. HRMS (ESI): *m/z* [M + H]<sup>+</sup> calcd for C<sub>17</sub>H<sub>22</sub>NOSi: 284.1471; found: 284.1478.

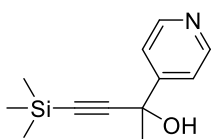

**2-(pyridin-4-yl)-4-(trimethylsilyl)but-3-yn-2-ol (3av)**

Following the *general procedure D*, when the reaction was finished after 2.5 h, the product **3av** was isolated by chromatography on silica gel (PE/EA = 1/1, eluent) as a white solid (46%, 20.1 mg). <sup>1</sup>H NMR (400 MHz, CDCl<sub>3</sub>) δ 8.54 (dd, *J* = 4.8, 1.6 Hz, 2H), 7.54 (dd, *J* = 4.6, 1.6 Hz, 2H), 3.73 (s, 1H), 1.72 (s, 3H), 0.19 (s, 9H). <sup>13</sup>C NMR (101 MHz, CDCl<sub>3</sub>) δ 154.76, 149.52, 120.05, 107.51, 90.02, 69.06, 33.12, -0.21. HRMS (ESI): *m/z* [M + H]<sup>+</sup> calcd for C<sub>12</sub>H<sub>18</sub>NOSi: 220.1158; found: 220.1153.

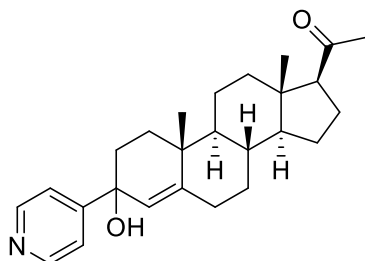

**1-((8S,9S,10R,13S,14S,17S)-3-hydroxy-10,13-dimethyl-3-(pyridin-4-yl)-2,3,6,7,8,9,10,11,12,13,14,15,16,17-tetradecahydro-1H-cyclopenta[a]phenanthren-17-yl)ethan-1-one (3aw)**

Following the *general procedure D*, when the reaction was finished after 4 h, the product **3aw** was isolated by chromatography on silica gel (PE/EA = 1/1, eluent) as a yellow solid (38%, 30.0 mg). <sup>1</sup>H NMR (400 MHz, CDCl<sub>3</sub>) δ 8.66 (s, 2H), 7.56 (s, 2H), 5.33 (s, 1H), 2.56 (t, *J* = 9.0 Hz, 1H), 2.43 – 2.31 (m, 1H), 2.20 (ddd, *J* = 11.2, 4.3, 2.1 Hz, 2H), 2.13 (s, 3H), 2.06 – 1.96 (m, 2H), 1.94 – 1.86 (m, 2H), 1.80 – 1.67 (m, 2H), 1.57 (dddd, *J* = 29.7, 12.0, 6.3, 3.8 Hz, 3H), 1.47 – 1.37 (m, 2H), 1.32 – 1.18 (m, 3H), 1.13 (s, 3H), 1.08 (dd, *J* = 13.0, 4.1 Hz, 1H), 0.93 – 0.85 (m, 1H), 0.67 (s, 3H). <sup>13</sup>C NMR (101 MHz, CDCl<sub>3</sub>) δ 209.37, 176.1, 157.5, 149.73, 147.98, 122.88, 73.23, 63.63, 56.22, 54.17, 44.10, 38.75, 37.56, 35.97, 35.91, 33.51, 33.47, 32.36, 31.47, 24.40, 22.85, 21.19, 18.95, 13.38. HRMS (ESI): *m/z* [M + H]<sup>+</sup> calcd for C<sub>26</sub>H<sub>36</sub>NO<sub>2</sub>: 394.2746; found: 394.2741.

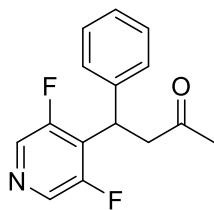

#### 4-(3,5-difluoropyridin-4-yl)-4-phenylbutan-2-one (3ax)

Following the *general procedure D*, when the reaction was finished after 4 h, the product **3ax** was isolated by chromatography on silica gel (PE/EA = 1/1, eluent) as a yellow liquid (69%, 36.0 mg). <sup>1</sup>H NMR (400 MHz, CDCl<sub>3</sub>) δ 8.27 (s, 2H), 7.35 – 7.30 (m, 4H), 7.25 (ddd, *J* = 7.2, 3.7, 2.2 Hz, 1H), 4.98 (dd, *J* = 8.9, 6.4 Hz, 1H), 3.52 (dd, *J* = 18.2, 8.9 Hz, 1H), 3.33 (ddt, *J* = 18.1, 6.4, 1.5 Hz, 1H), 2.18 (s, 3H). <sup>13</sup>C NMR (101 MHz, CDCl<sub>3</sub>) δ 205.45, 157.5 (d, *J* = 260.6 Hz), 150.77, 140.20, 134.8 – 134.4 (m), 128.91, 127.56, 127.34, 46.65, 35.61, 30.00. <sup>19</sup>F NMR (376 MHz, CDCl<sub>3</sub>) δ -128.22. HRMS (ESI): *m/z* [M + H]<sup>+</sup> calcd for C<sub>15</sub>H<sub>14</sub>F<sub>2</sub>NO: 262.1043; found: 262.1038.

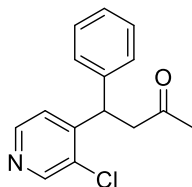

#### 4-(3-chloropyridin-4-yl)-4-phenylbutan-2-one (3ay)

Following the *general procedure D*, when the reaction was finished after 4 h, the product **3ay** was isolated by chromatography on silica gel (PE/EA = 1/1, eluent) as a yellow oil (62%, 32.1 mg). <sup>1</sup>H NMR (400 MHz, CDCl<sub>3</sub>) δ 8.59 – 8.50 (m, 1H), 8.42 (t, *J* = 4.2 Hz, 1H), 7.38 – 7.10 (m, 6H), 5.04 (dq, *J* = 8.2, 3.9, 3.4 Hz, 1H), 3.20 (dq, *J* = 7.3, 3.7 Hz, 2H), 2.16 (s, 3H). <sup>13</sup>C NMR (101 MHz, CDCl<sub>3</sub>) δ 205.21, 149.89, 149.83, 147.92, 147.89, 140.29, 132.02, 128.85, 128.82, 128.02, 127.99, 127.23, 127.21, 122.82, 48.10, 48.08, 41.86, 41.84, 30.26, 30.24. HRMS (ESI): *m/z* [M + H]<sup>+</sup> calcd for C<sub>15</sub>H<sub>15</sub>ClNO: 260.0842; found: 260.0834.

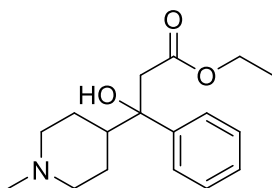

#### ethyl 3-hydroxy-3-(1-methylpiperidin-4-yl)-3-phenylpropanoate (4)

Following the *procedure E*, the product **4** was obtained as a yellow oil (60%, 175 mg). <sup>1</sup>H NMR (400 MHz, CDCl<sub>3</sub>) δ 7.36 (d, *J* = 7.5 Hz, 2H), 7.28 (t, *J* = 7.6 Hz, 2H), 7.19 (t, *J* = 7.2 Hz, 1H), 4.36 (s, 1H), 3.96 (q, *J* = 7.1 Hz, 2H), 3.04 (d, *J* = 15.7 Hz, 1H), 2.89 – 2.77 (m, 3H), 2.19 (s, 3H), 1.84 – 1.75 (m, 2H), 1.65 – 1.58 (m, 1H), 1.55 – 1.47 (m, 2H), 1.41 (ddt, *J* = 12.0, 8.8, 4.2 Hz, 2H), 1.03 (t, *J* = 7.1 Hz, 3H). <sup>13</sup>C NMR (101 MHz, CDCl<sub>3</sub>) δ 173.08, 144.39, 127.73, 126.69, 125.67, 76.48, 60.55, 55.95, 55.91, 46.55, 46.04, 41.81, 26.34, 26.15, 13.78.

## 11. Reference

- [1] J. L. Tu, J. L. Liu, W. Tang, M. Su, F. Liu, *Org. Lett.*, **2020**, 22, 1222-1226.
- [2] V. G. Lisnyak, T. Lynch-Colameta, S. A. Snyder, *Angew. Chem. Int. Ed.*, **2018**, 57, 15162-15166.
- [3] C. Allais, O. Baslé, J. M. Grassot, M. Fontaine, S. Anguille, J. Rodriguez, T. Constantieux, *Adv. Synth. Catal.*, **2012**, 354, 2084–2088.
- [4] F. J. Villani, M. S. King, F. J. Villani, *J. Med. Chem.*, **1963**, 6, 142-144.
- [5] J. X. Shen, N. N. Li, Y. J. Yu, C. H. Ma, *Org. Lett.*, **2019**, 21, 7179-7183.
- [6] L. A. Nickerson, V. Huynh, E. I. Balmond, S. P. Cramer, J. T. Shaw, *J. Org. Chem.*, **2016**, 81, 11404–11408.
- [7] F. Chen, Y. Zhang, L. Yu, S. Zhu, *Angew. Chem. Int. Ed.*, **2017**, 56, 2022–2025.

## 12. Copies of NMR spectra for the products

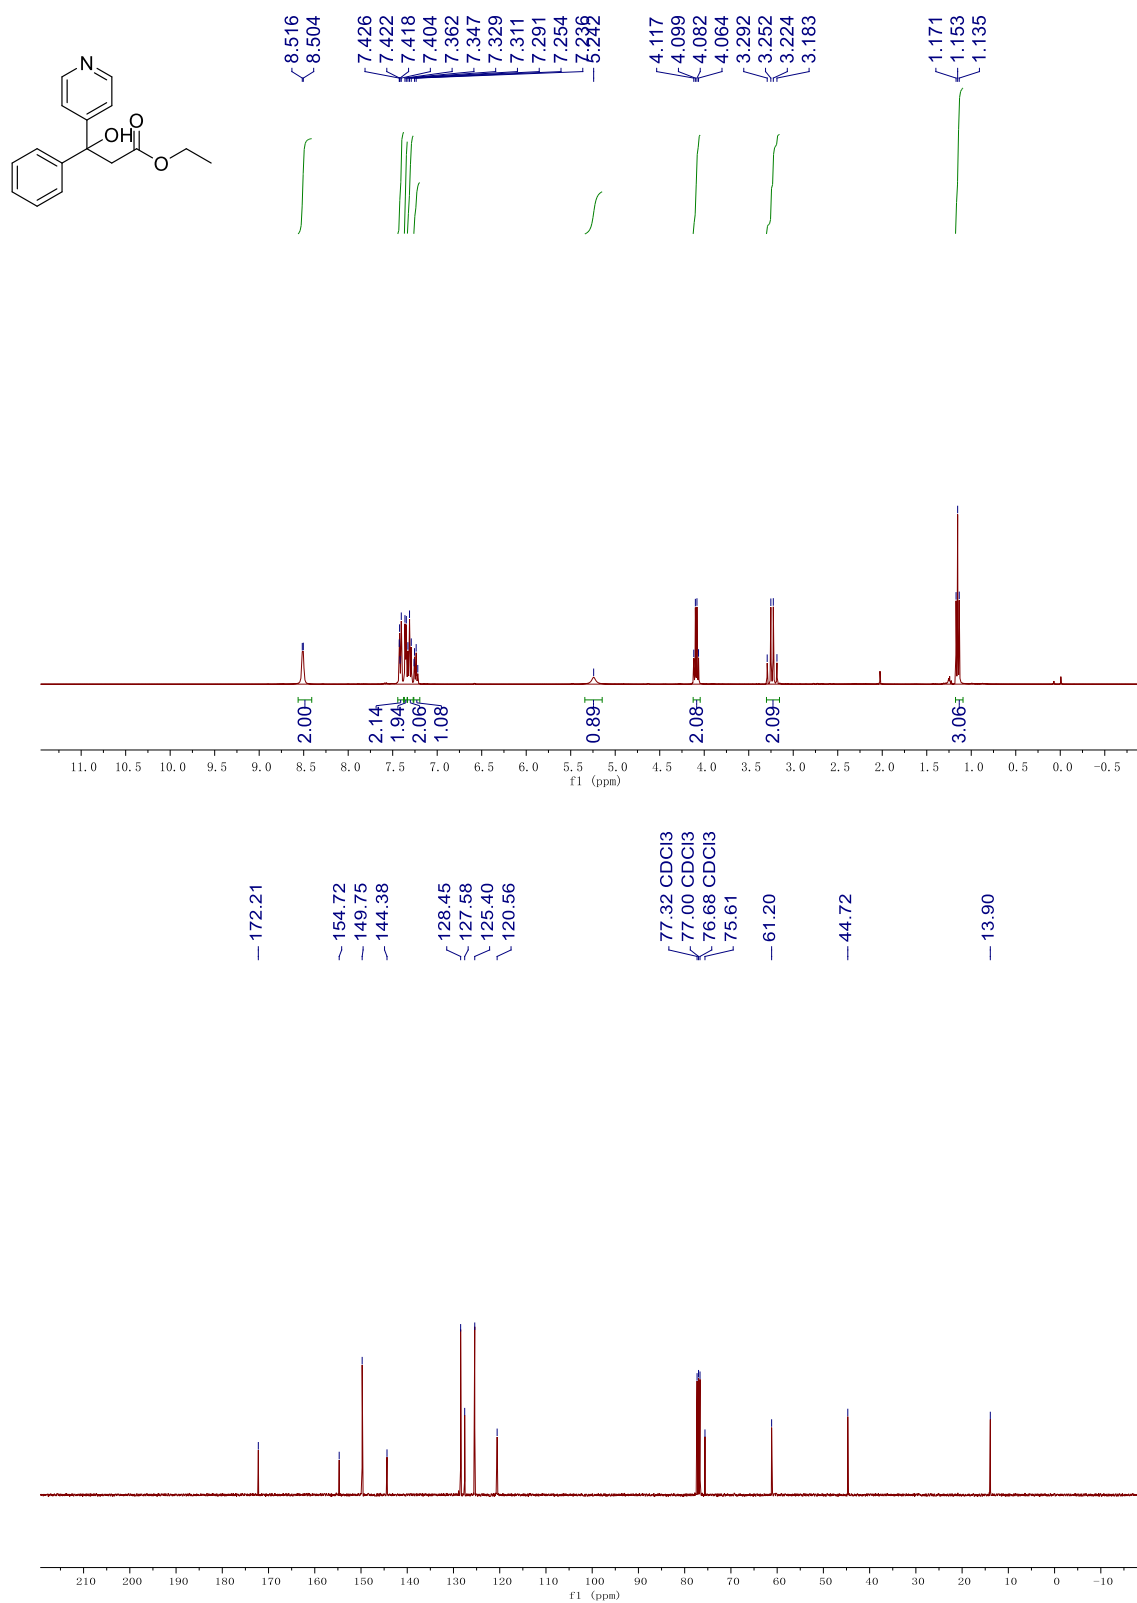

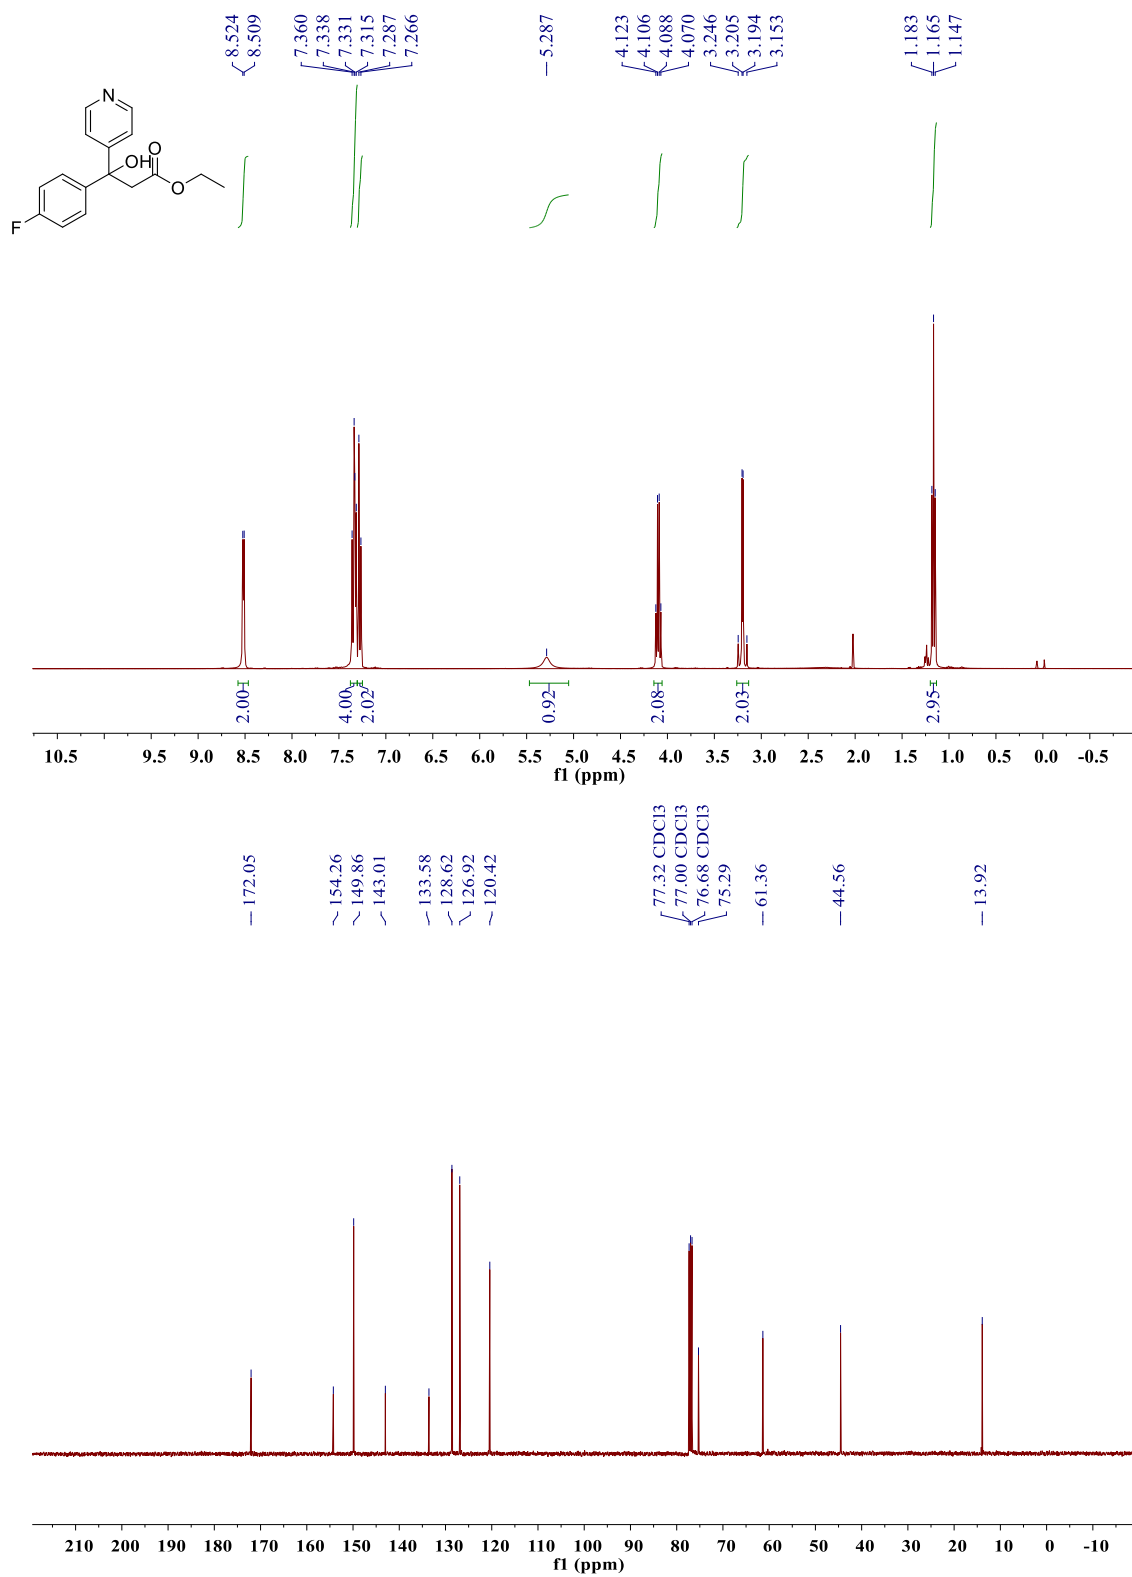

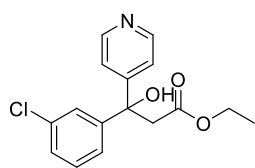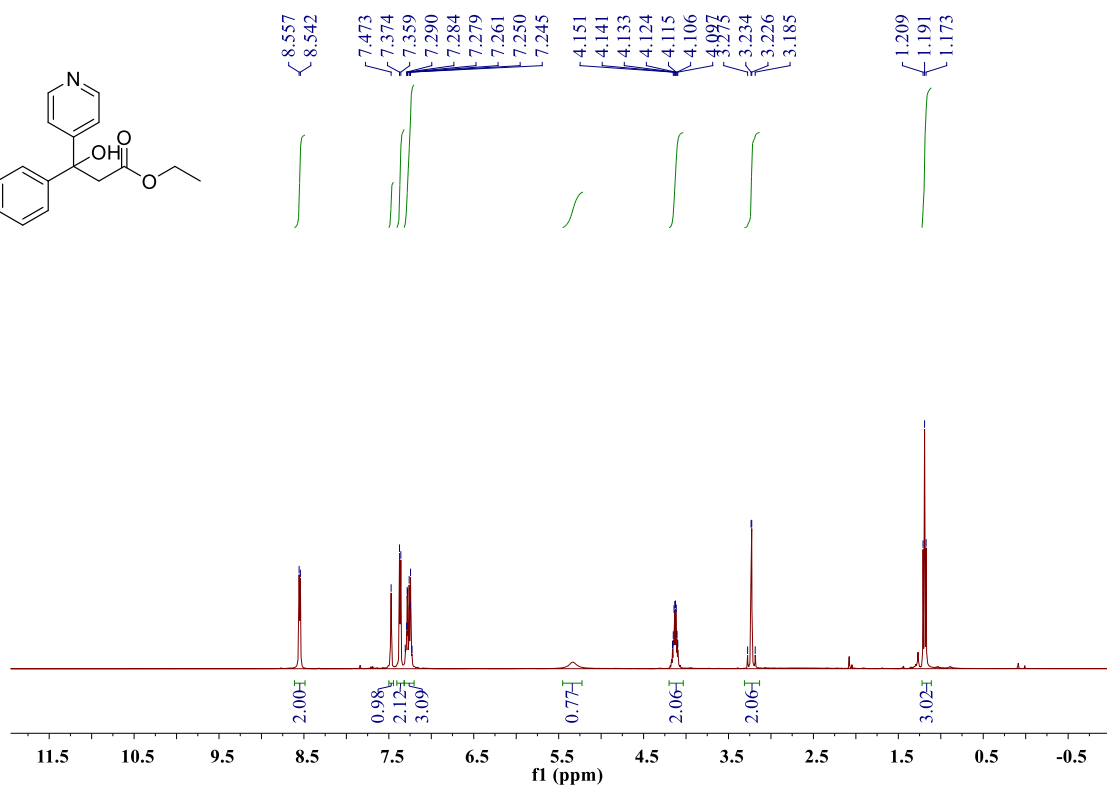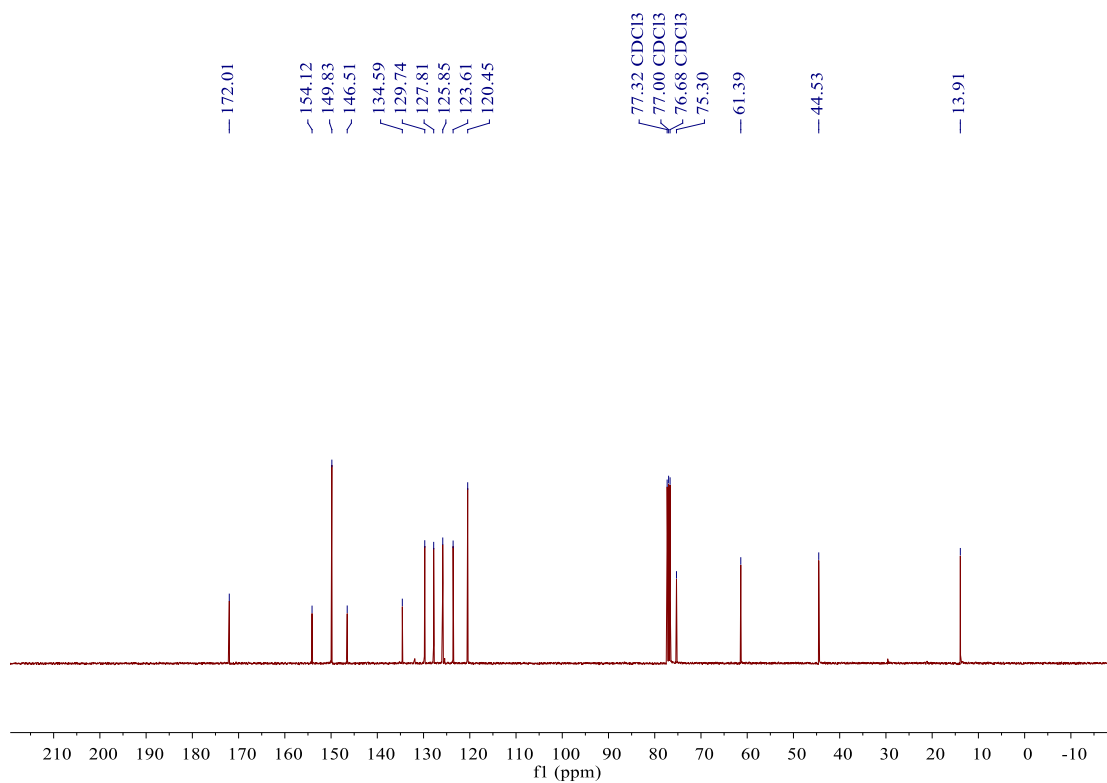

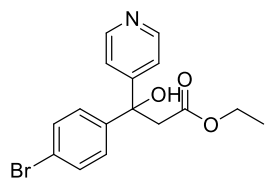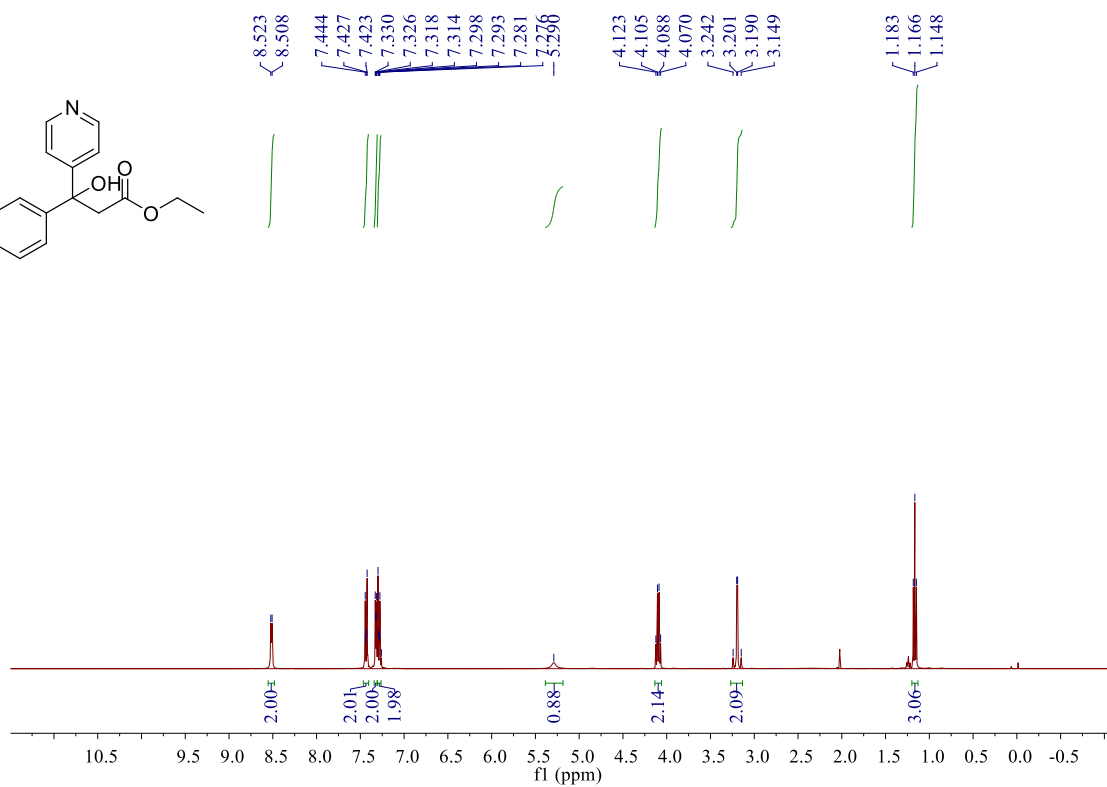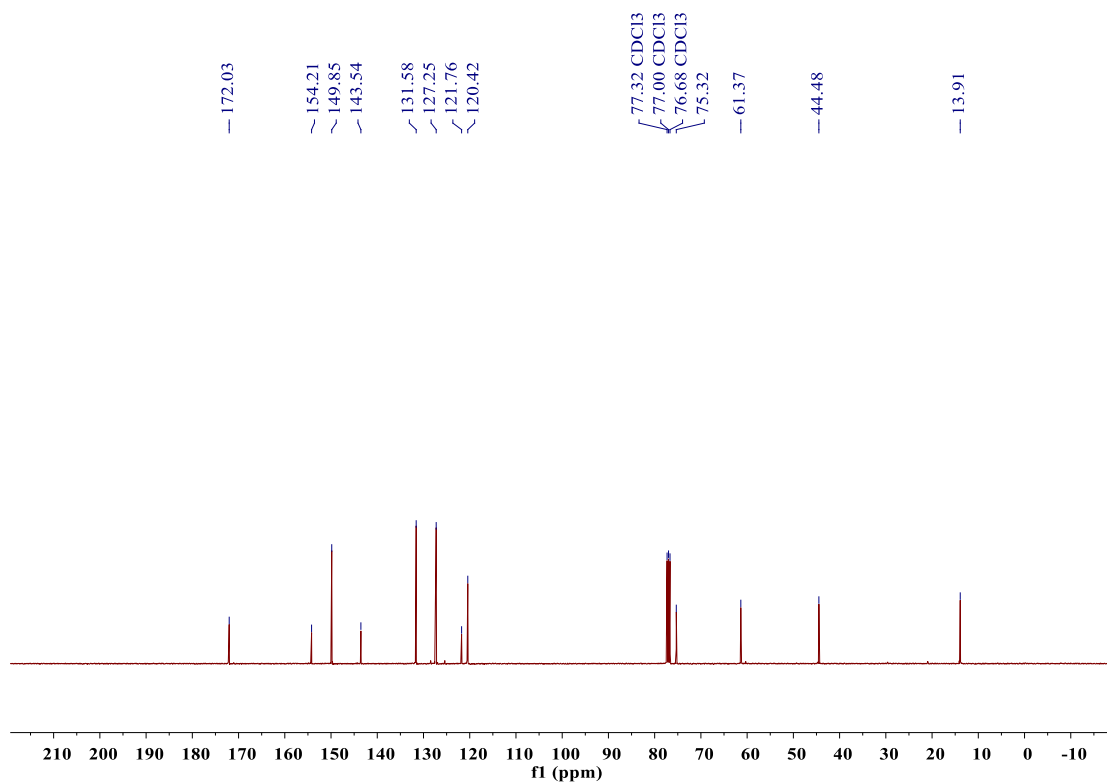

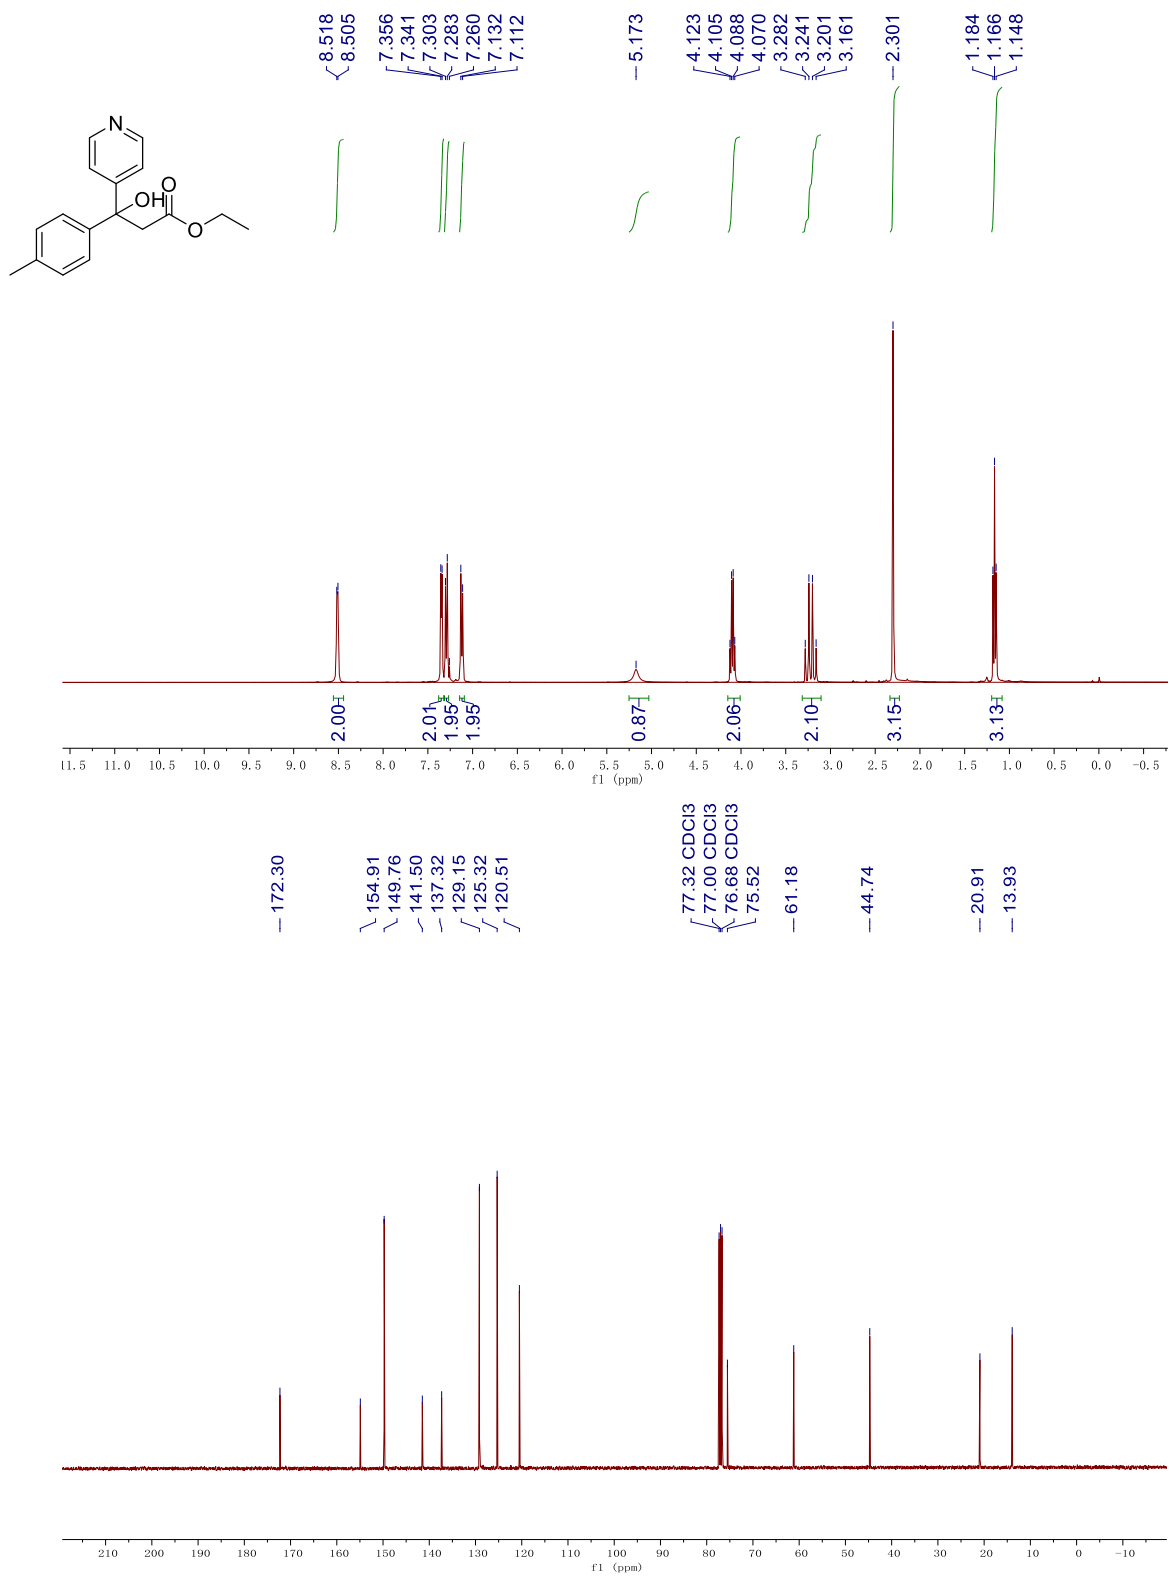

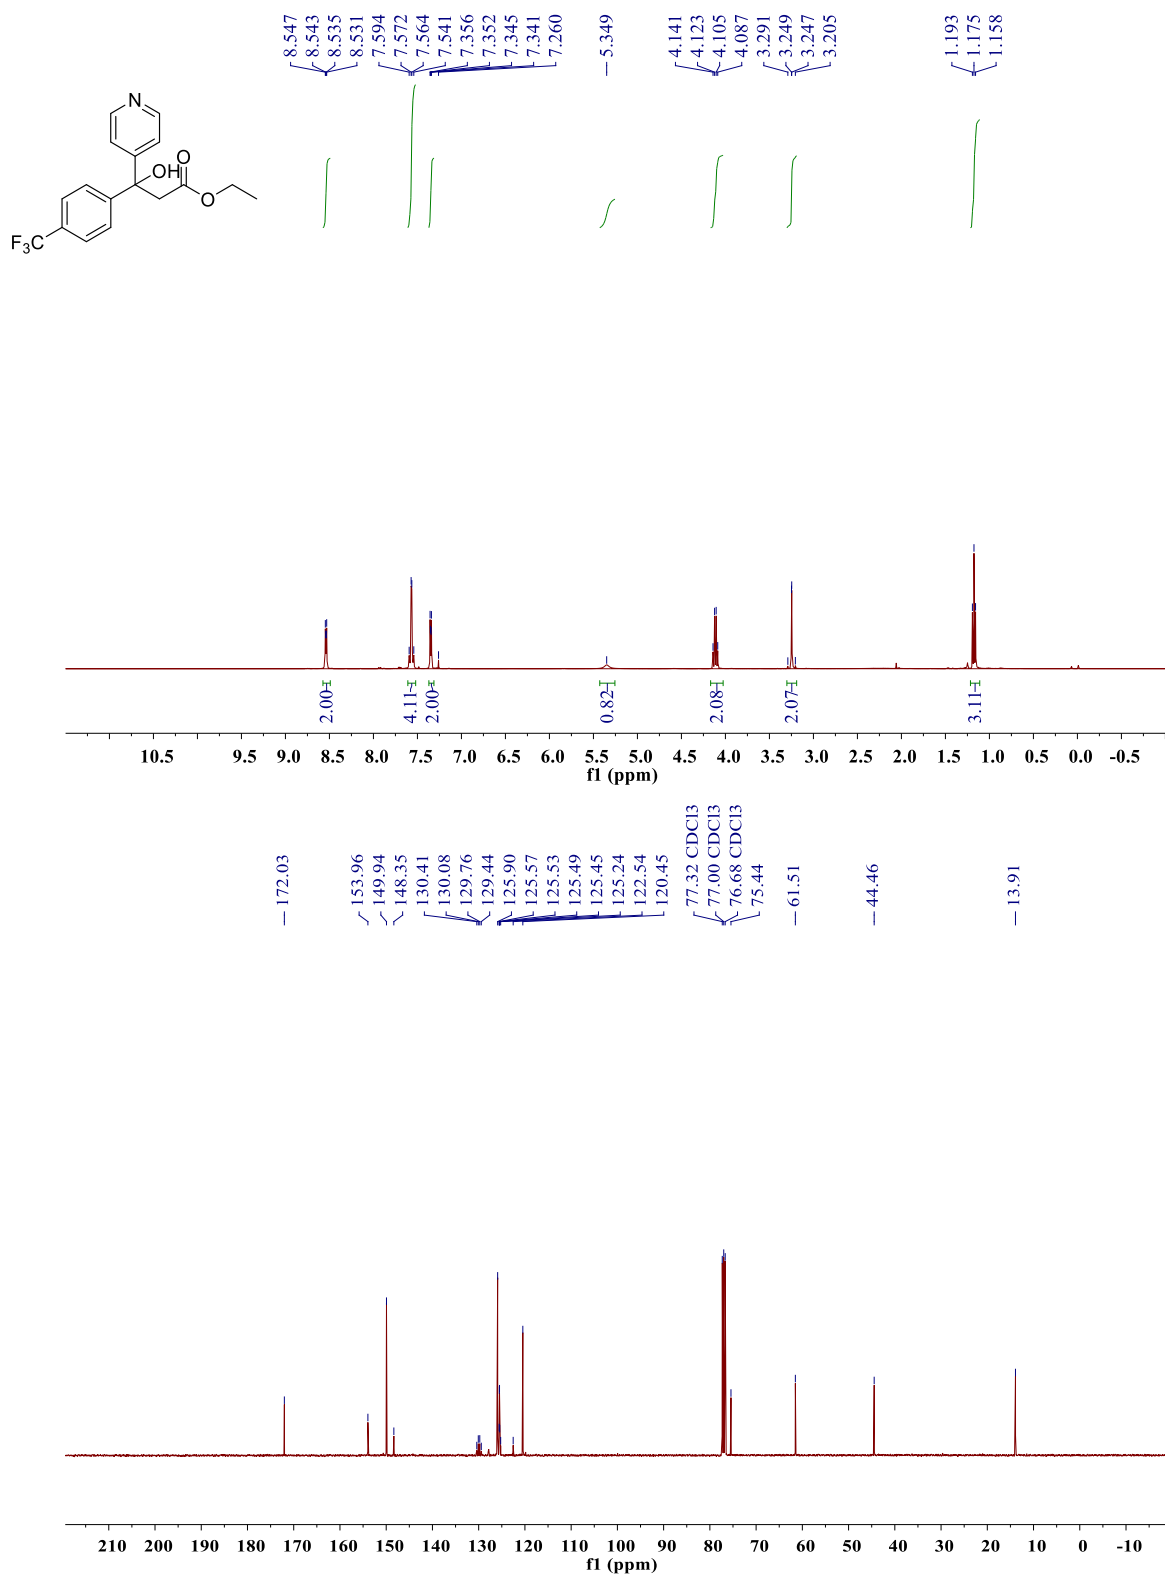

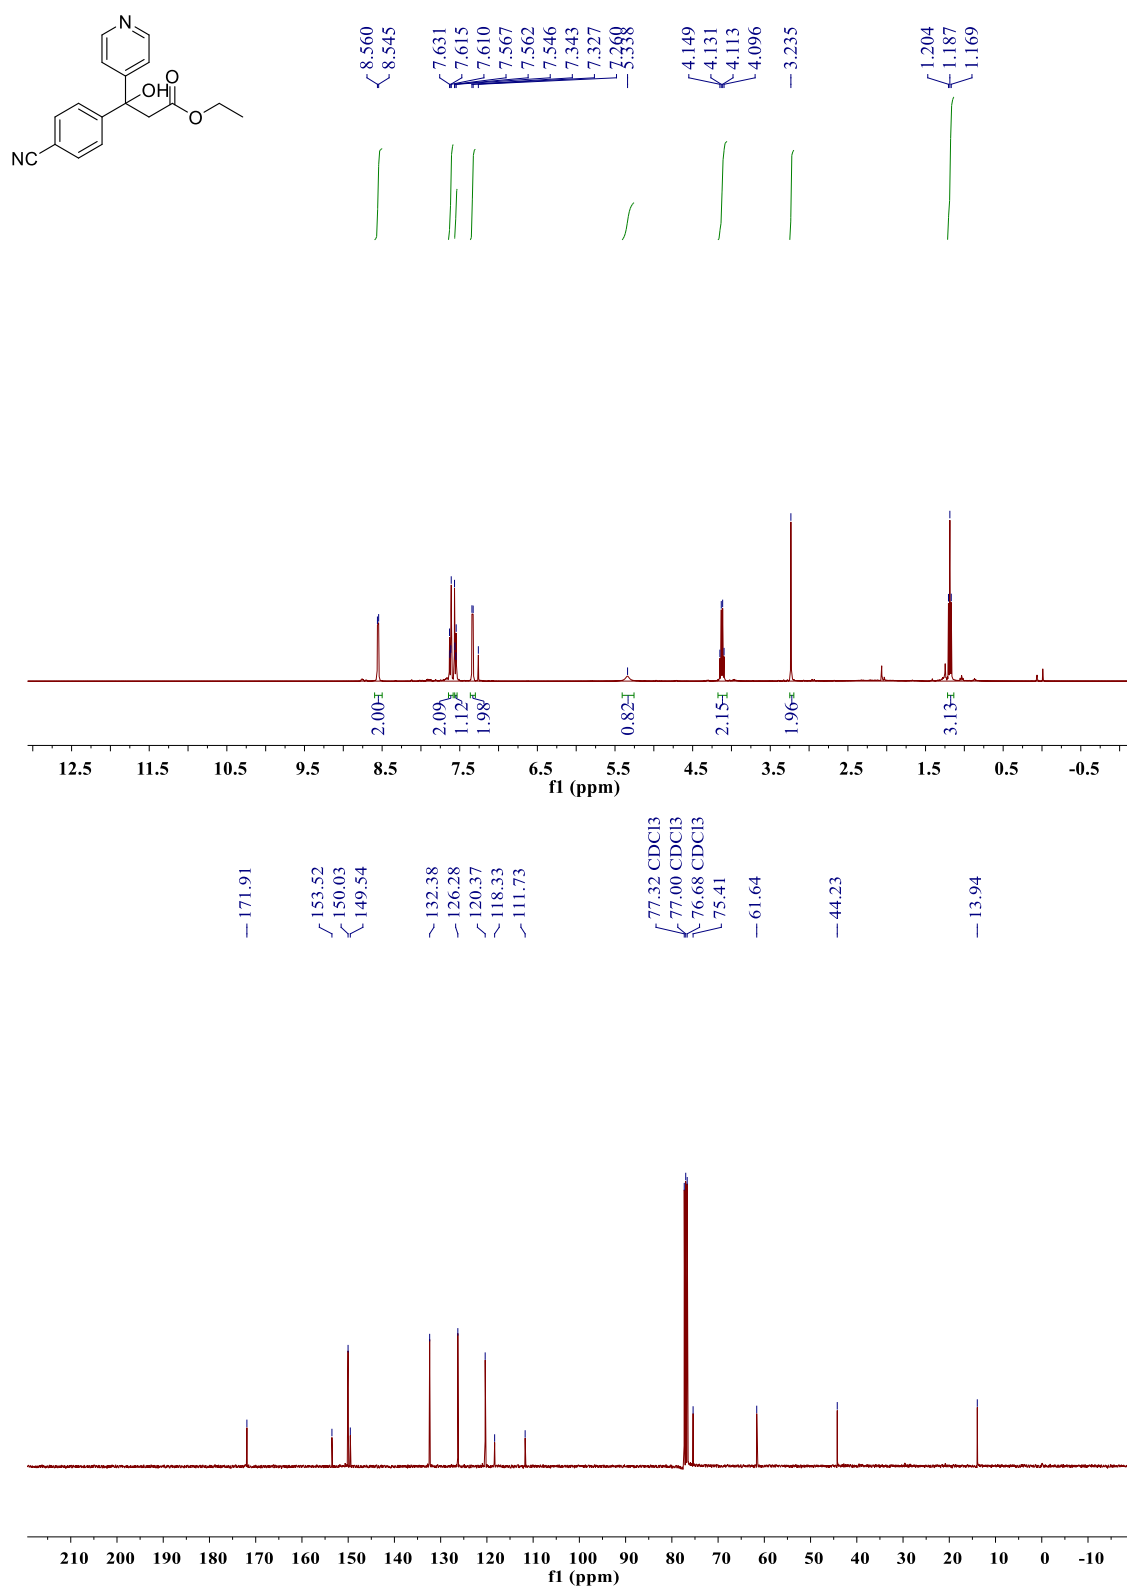

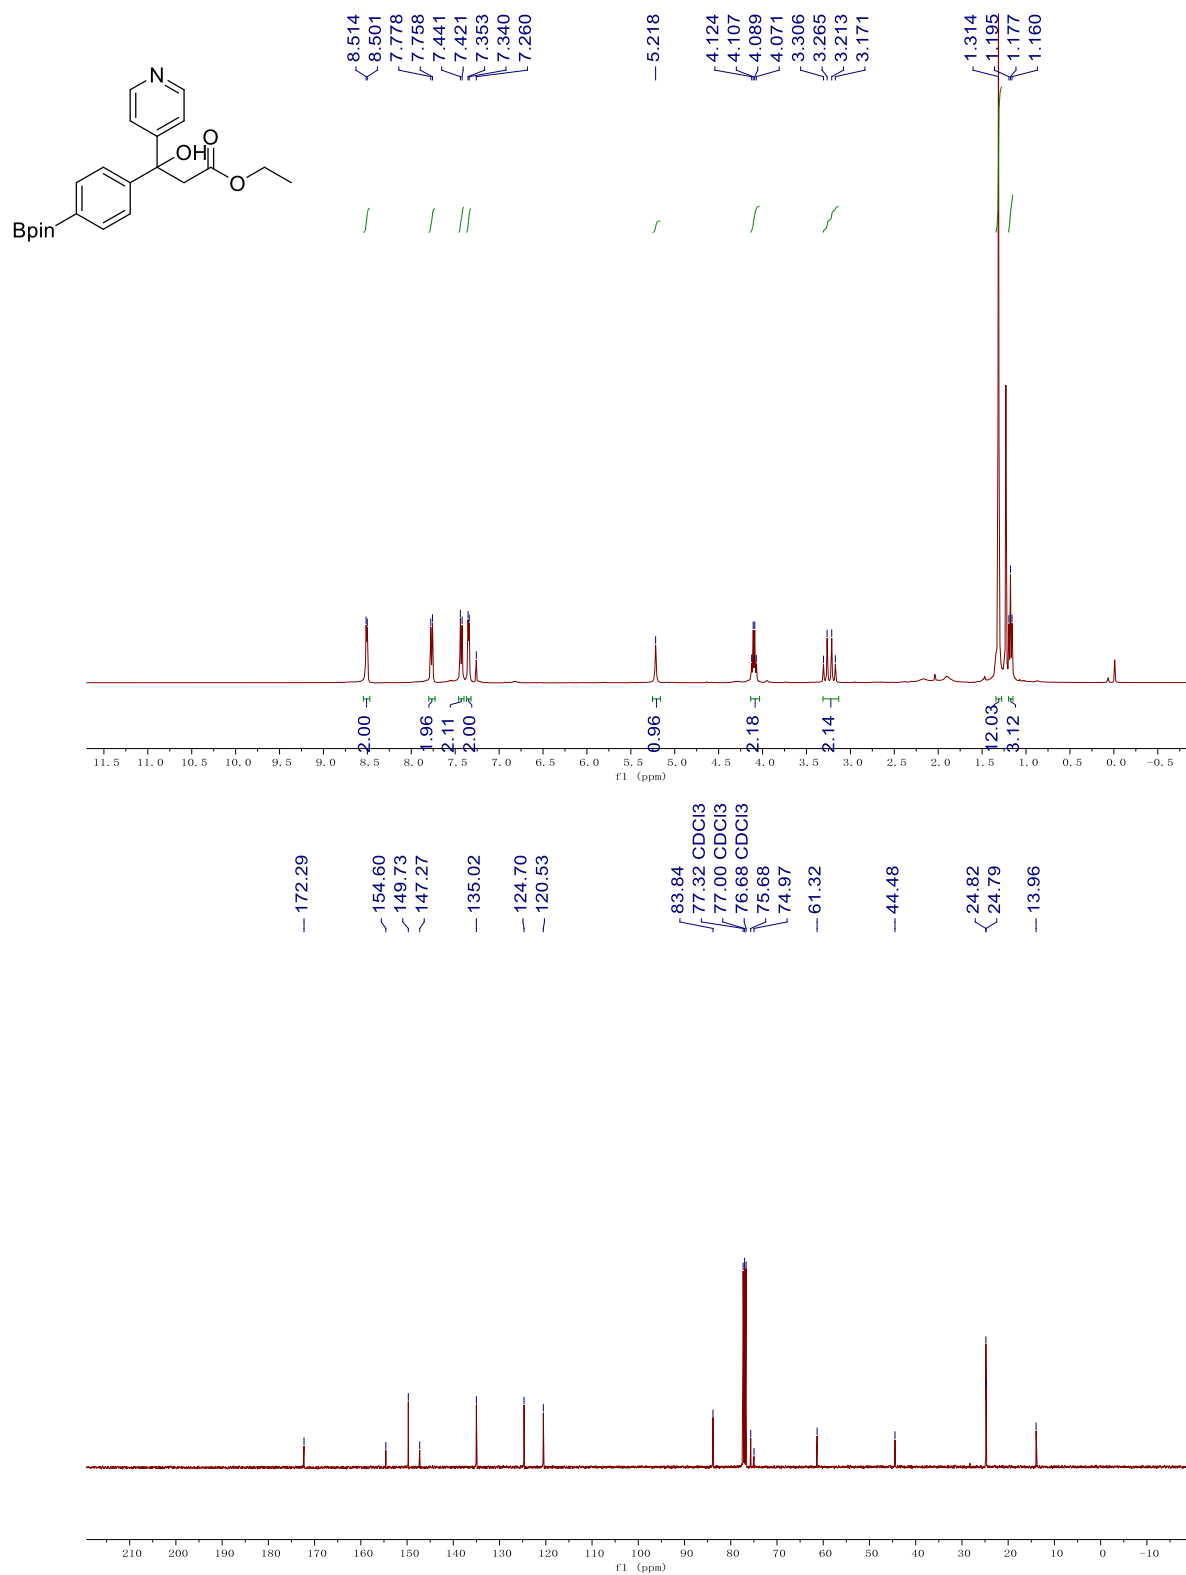

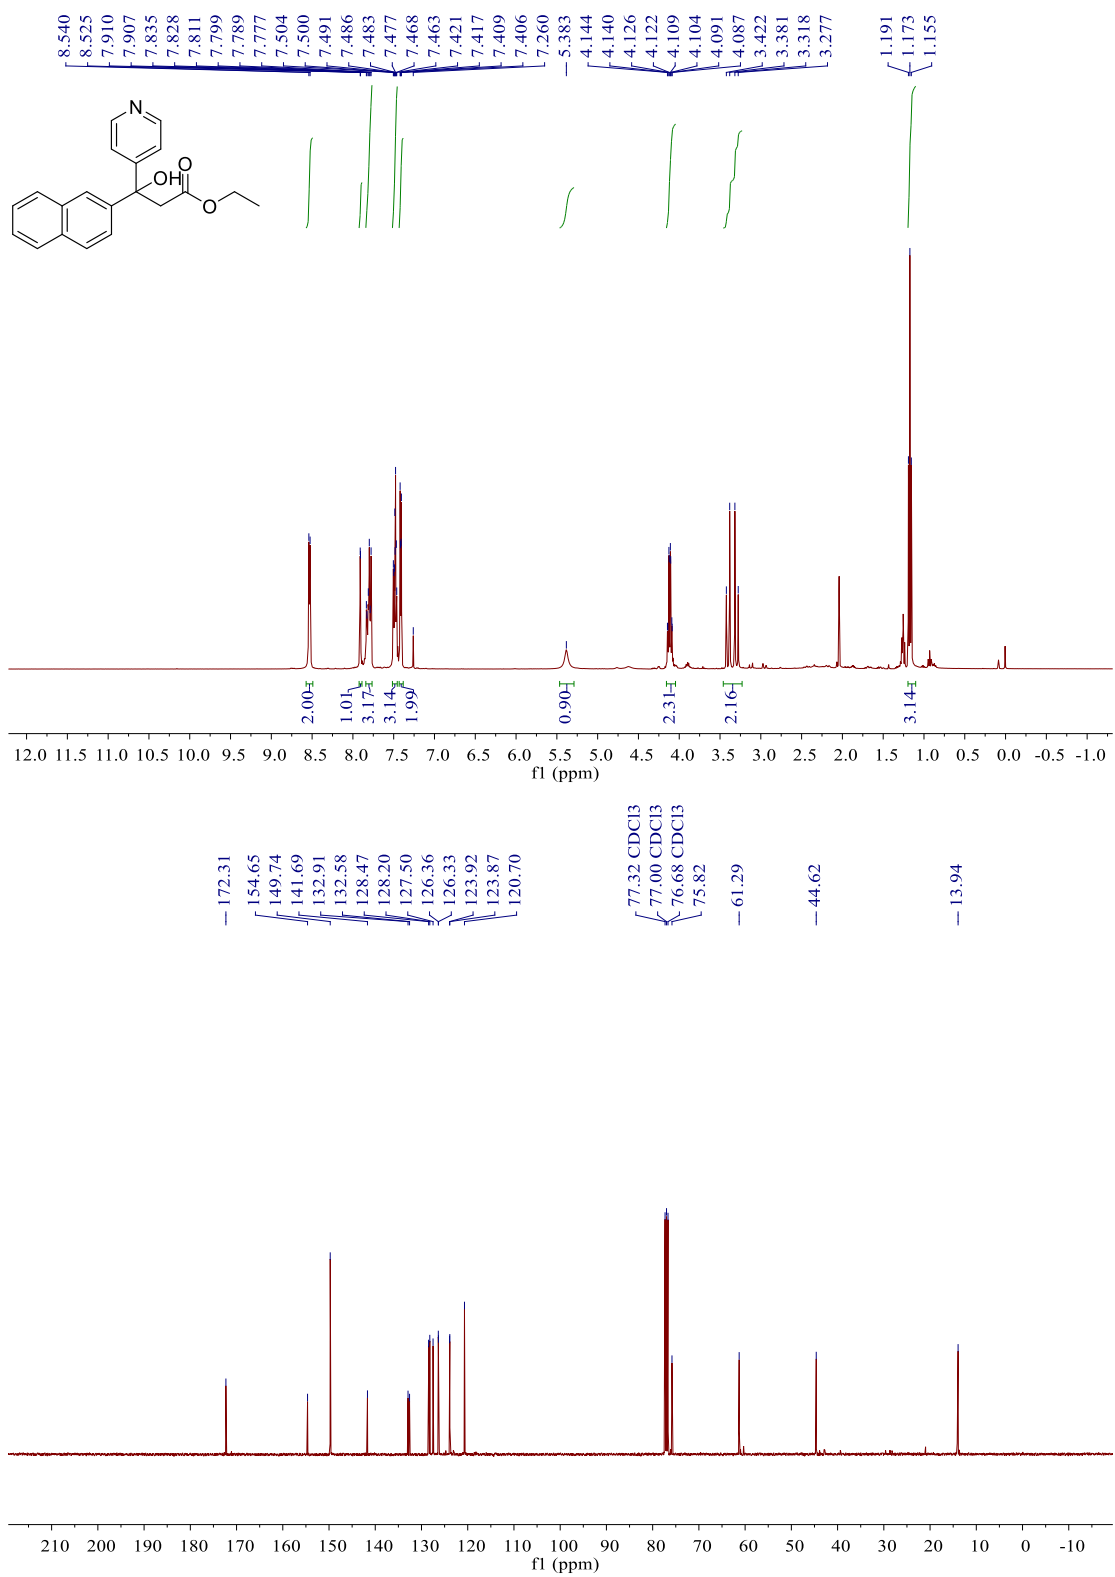

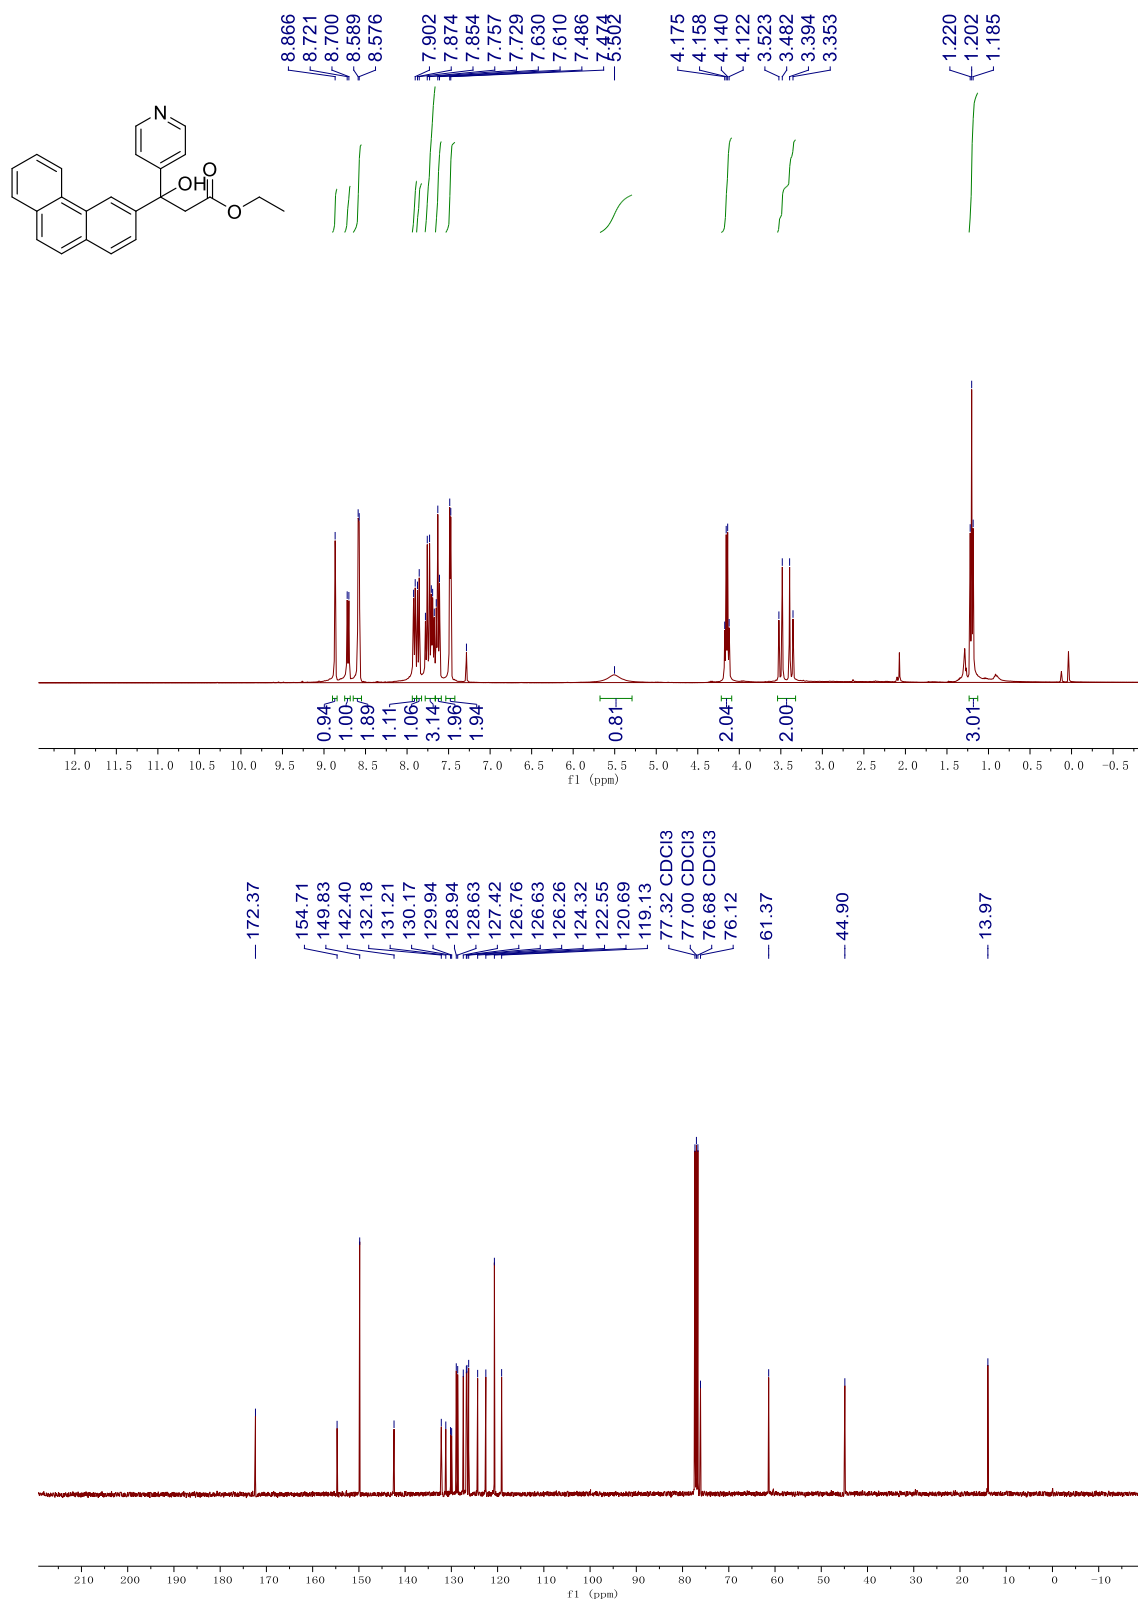

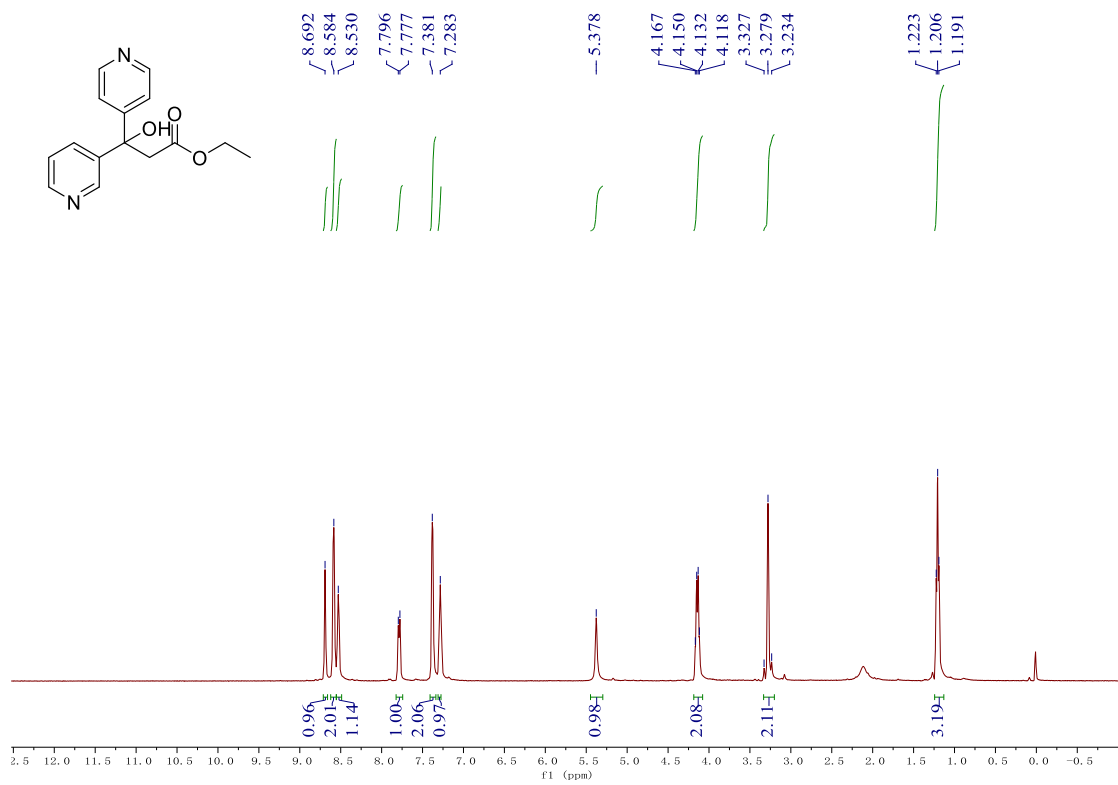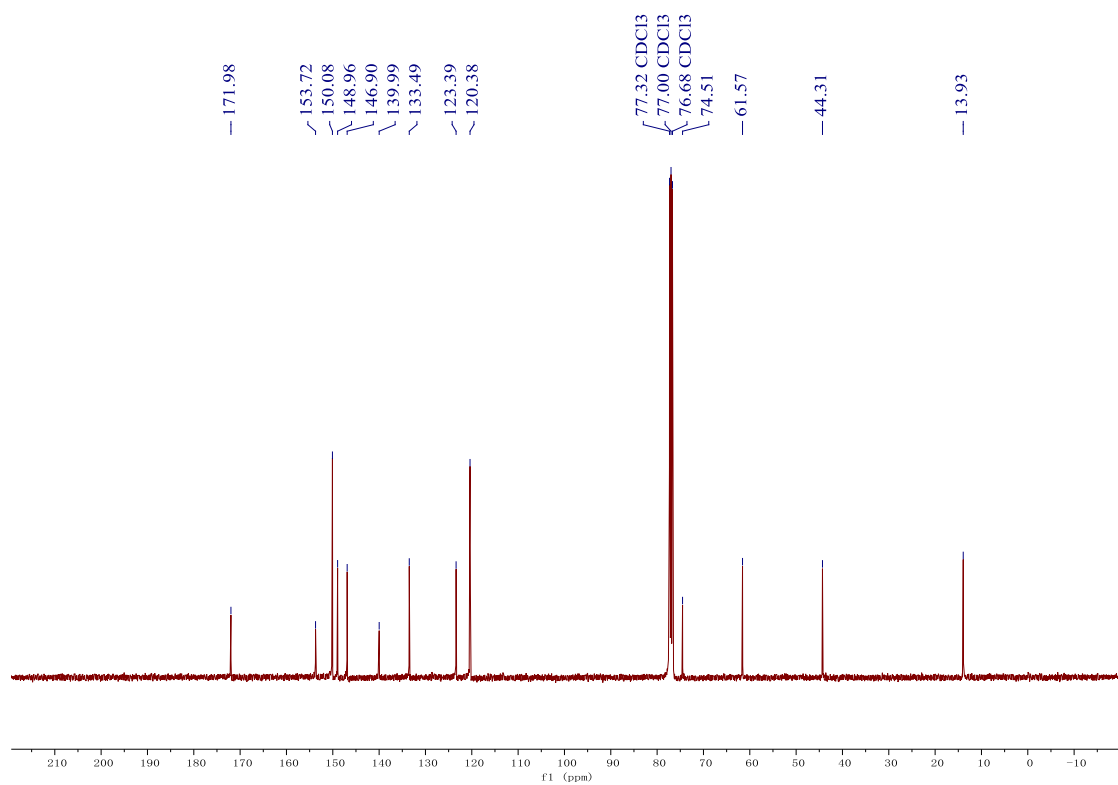

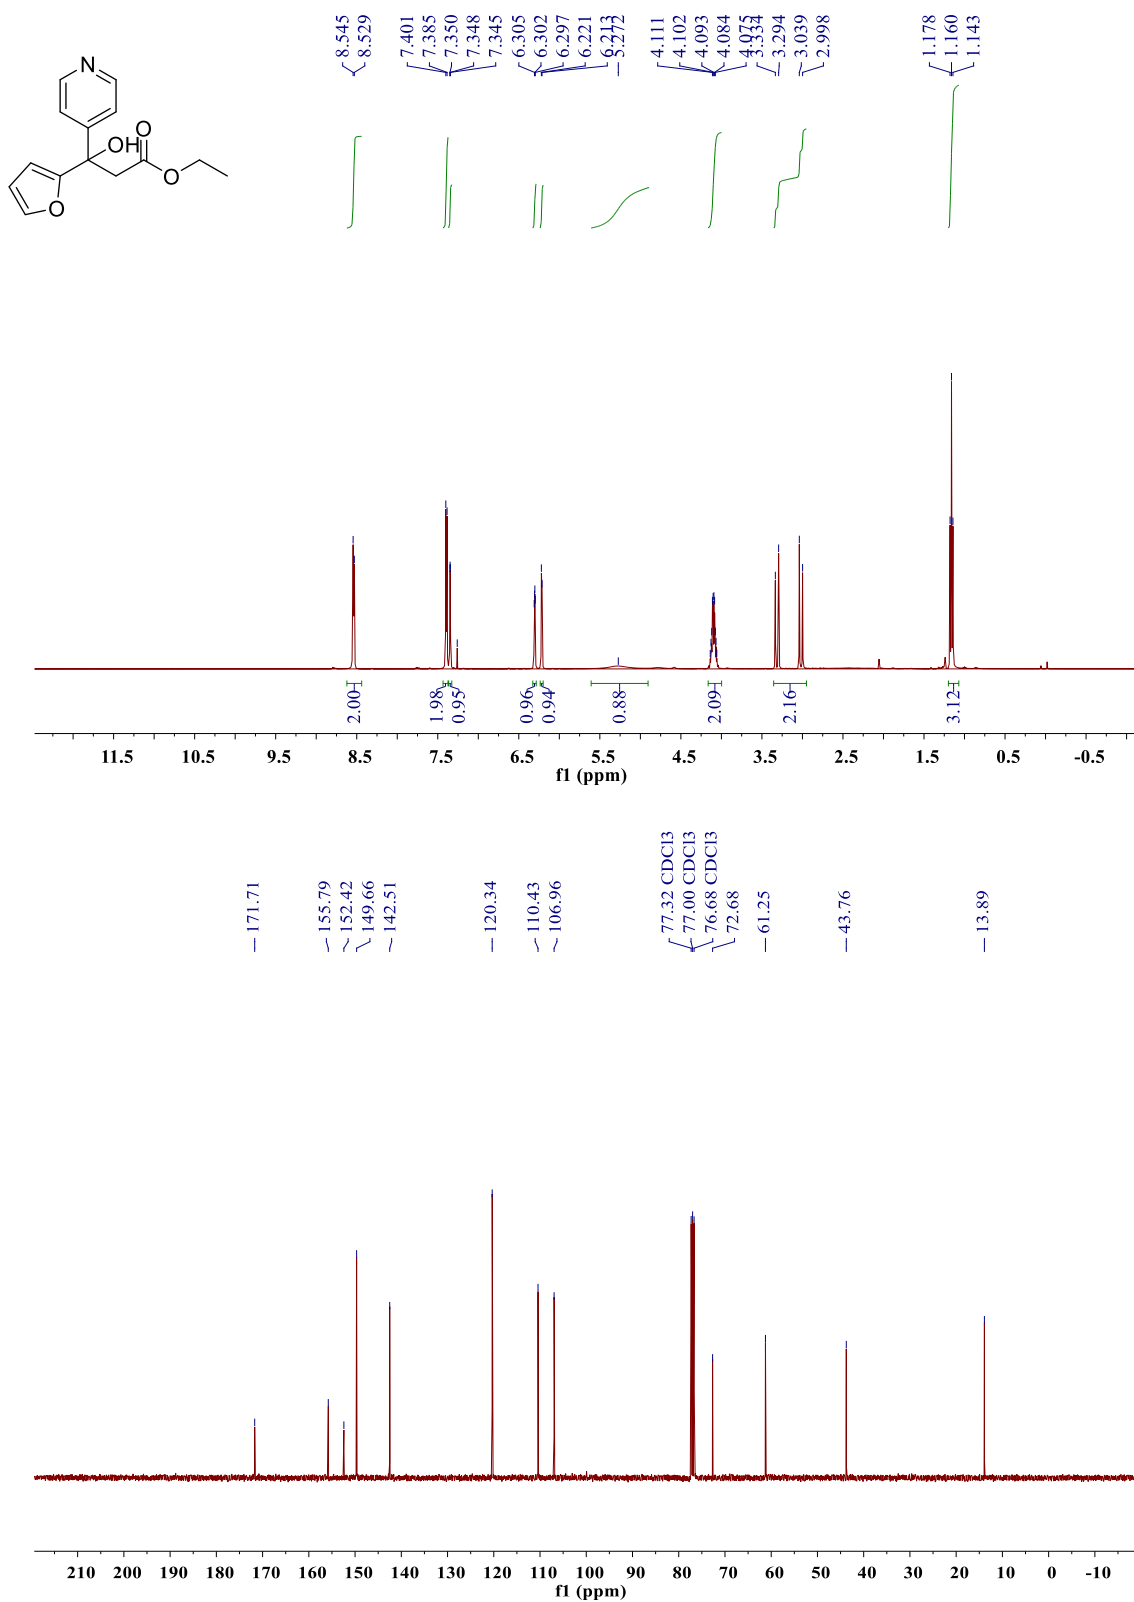

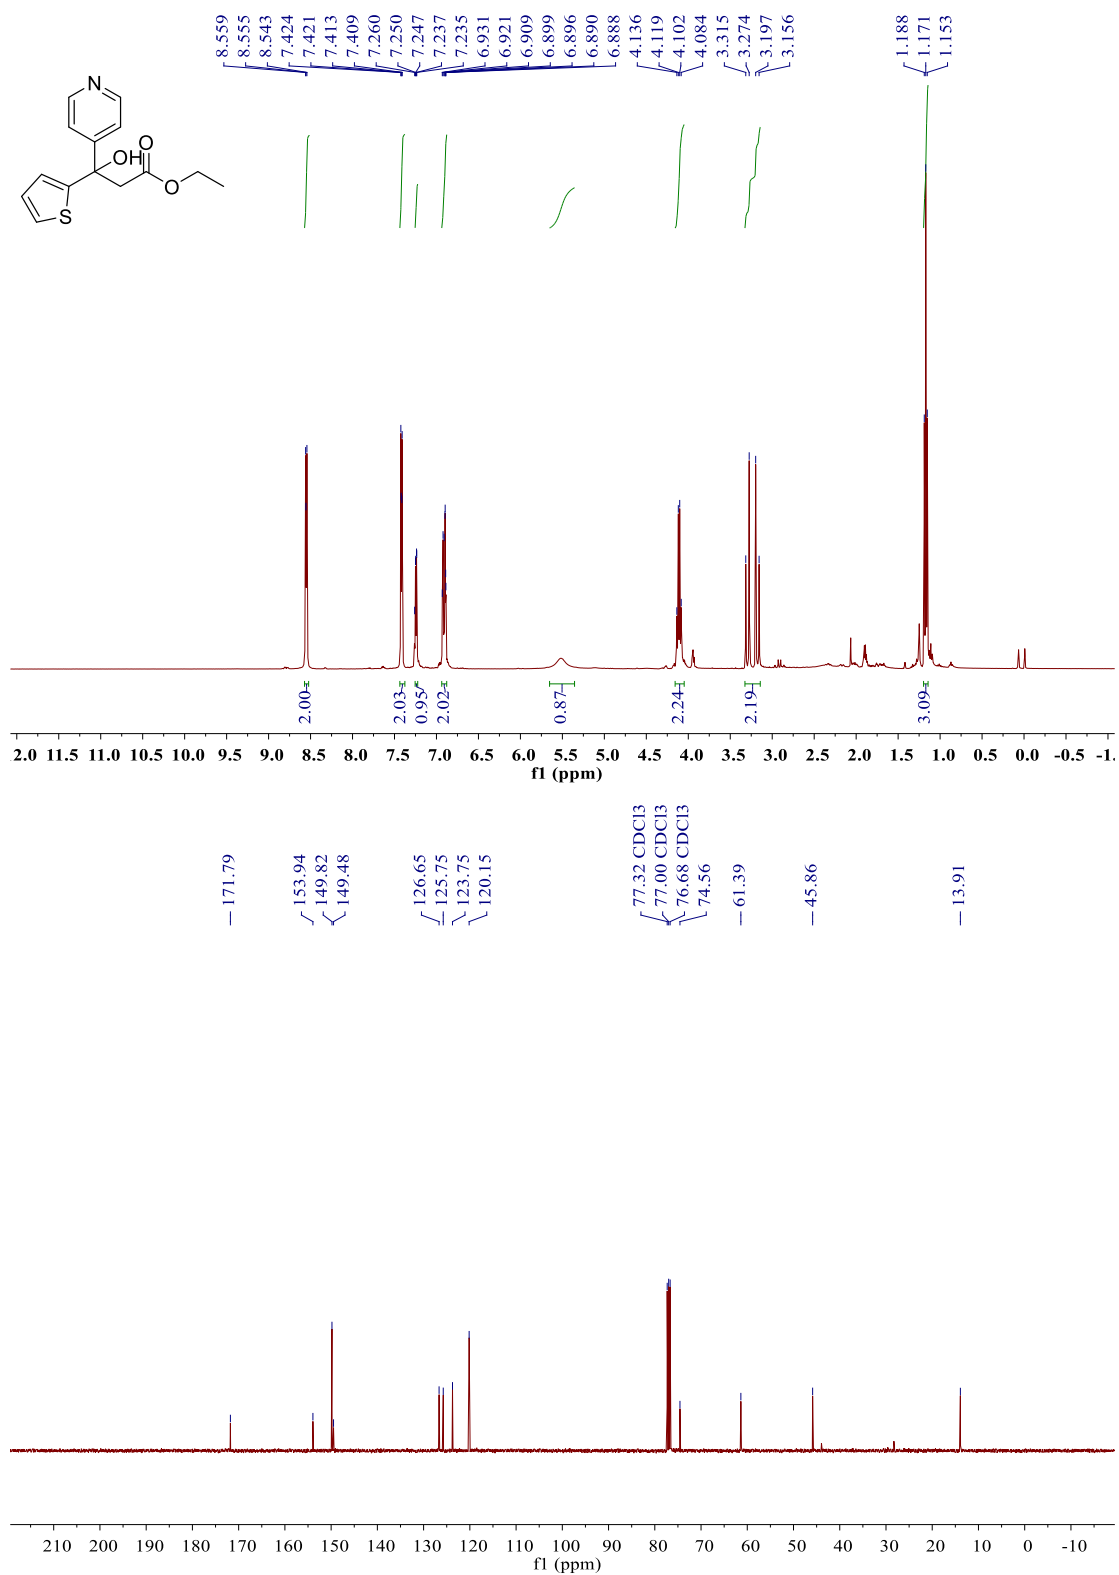

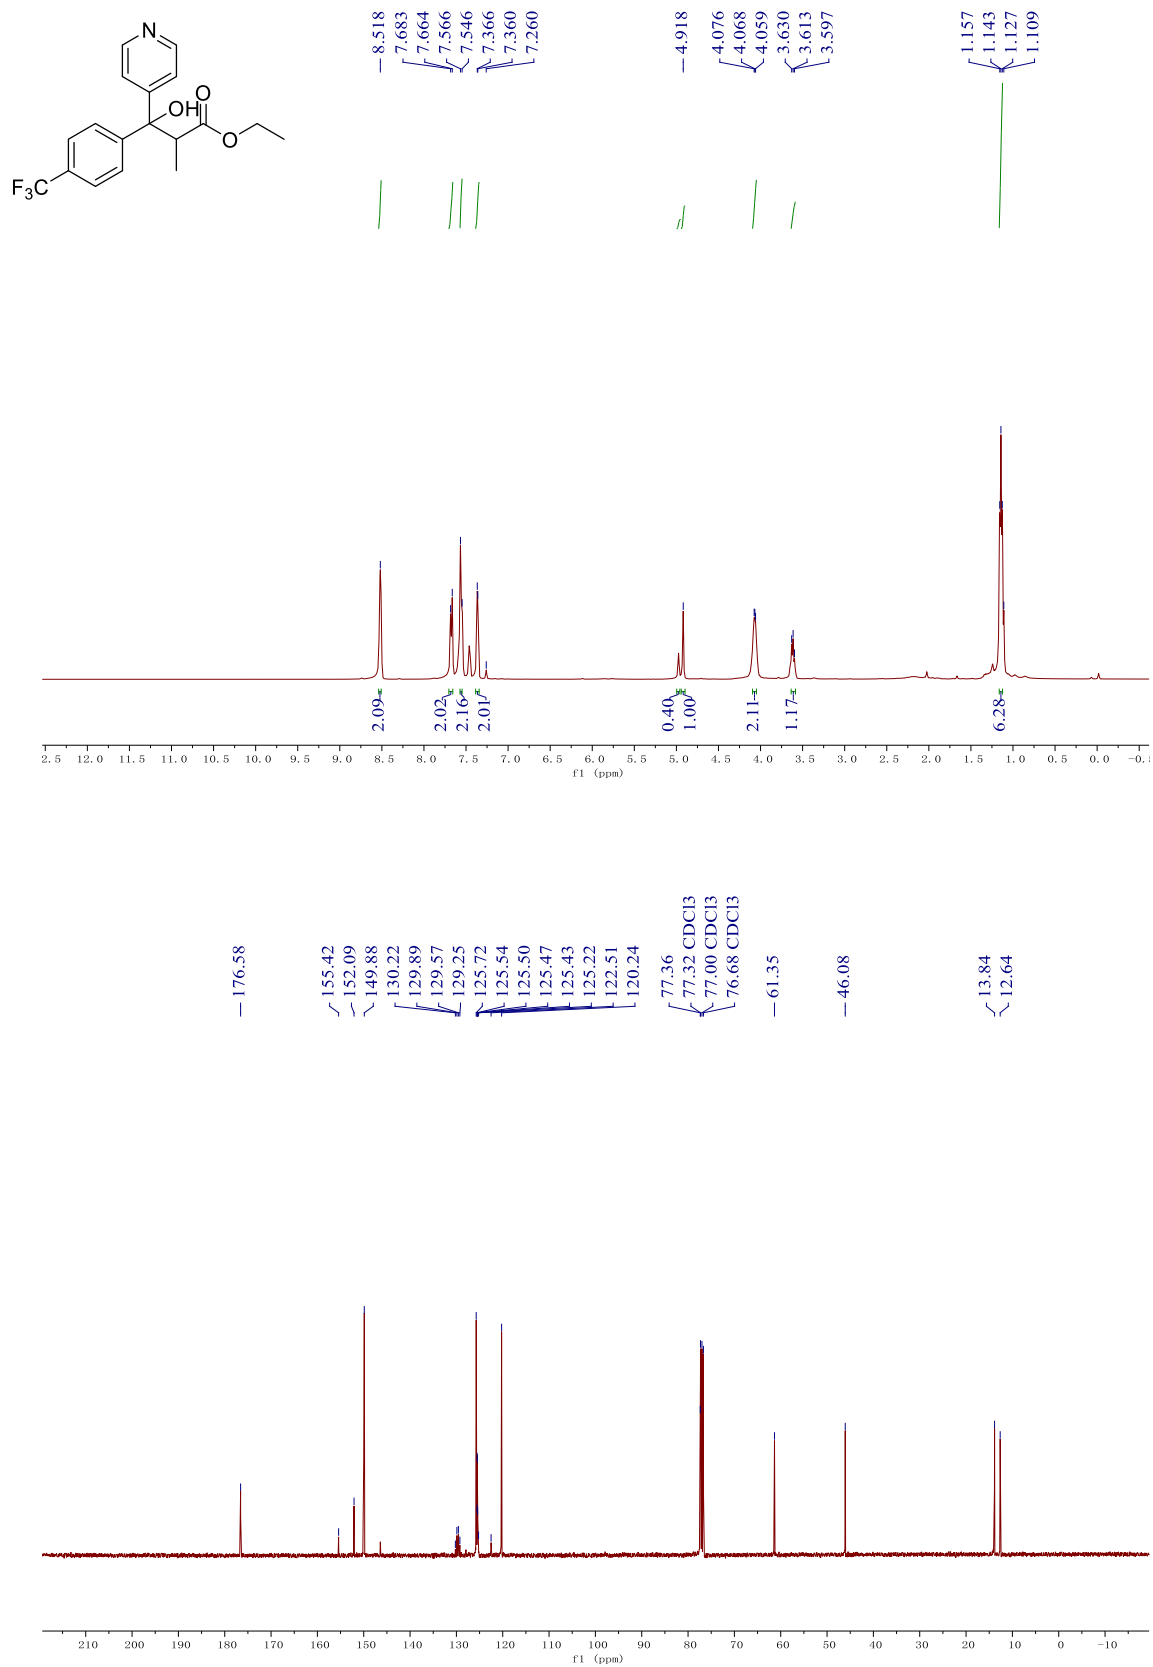

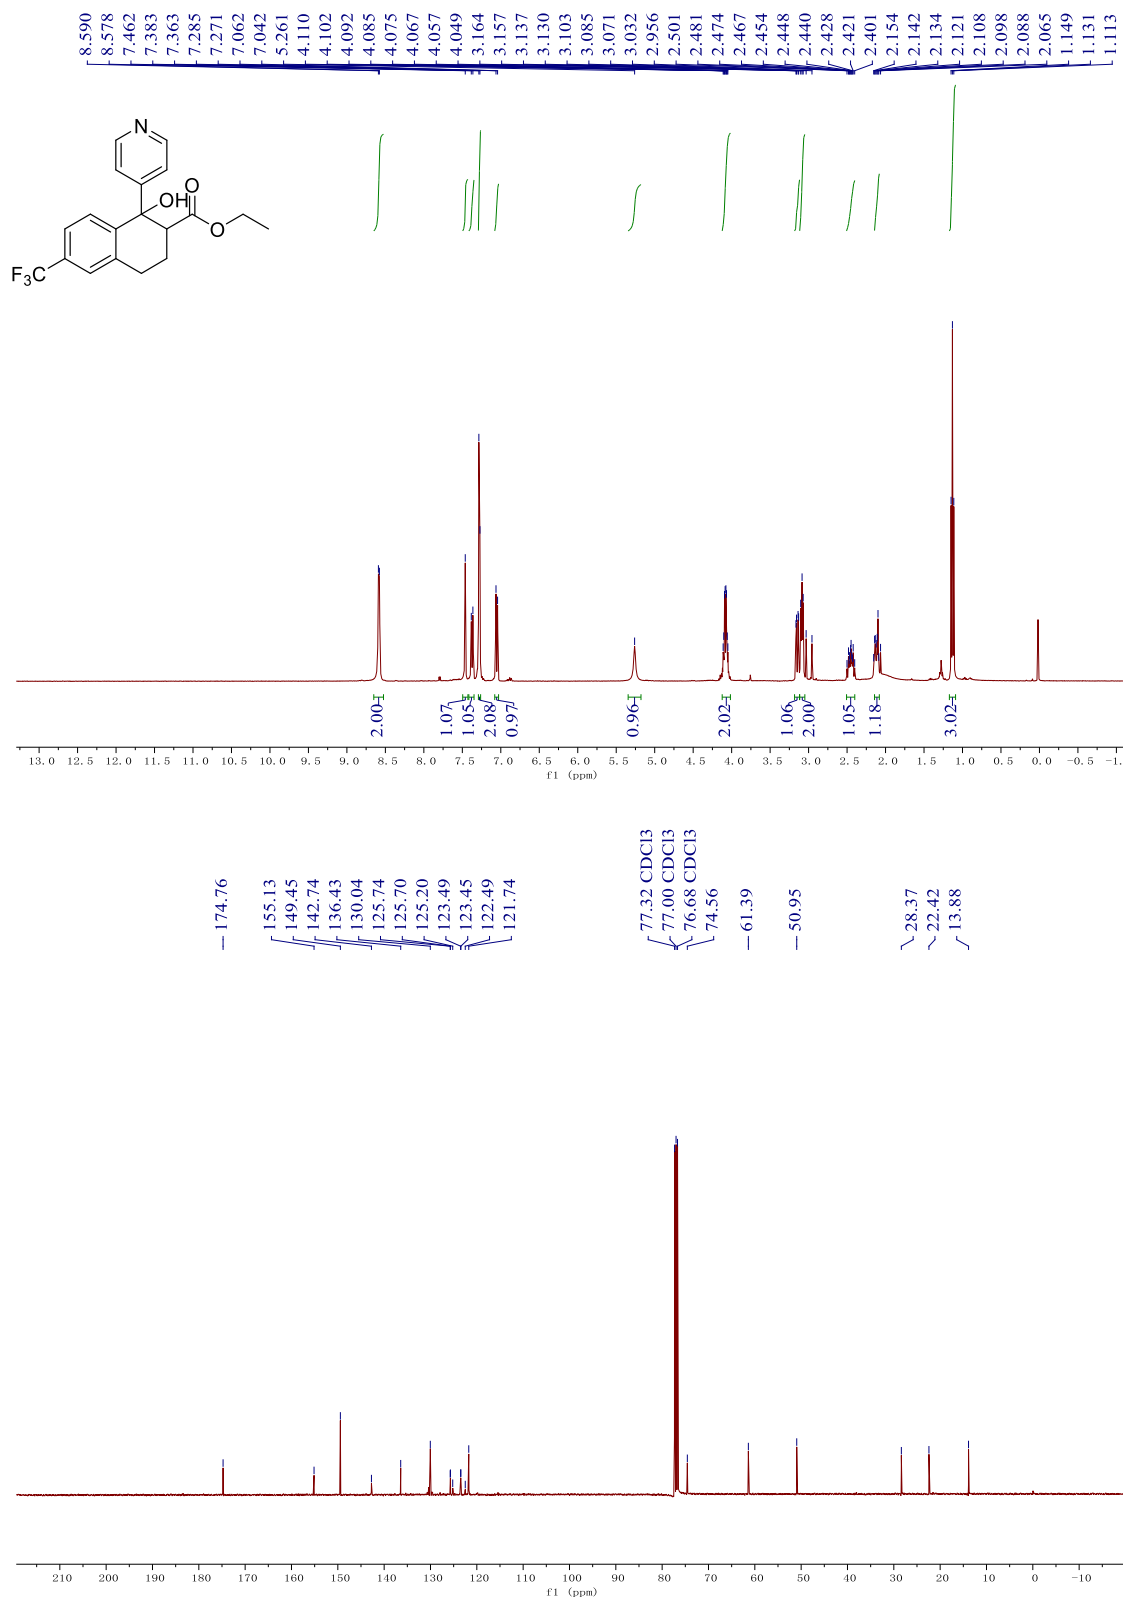



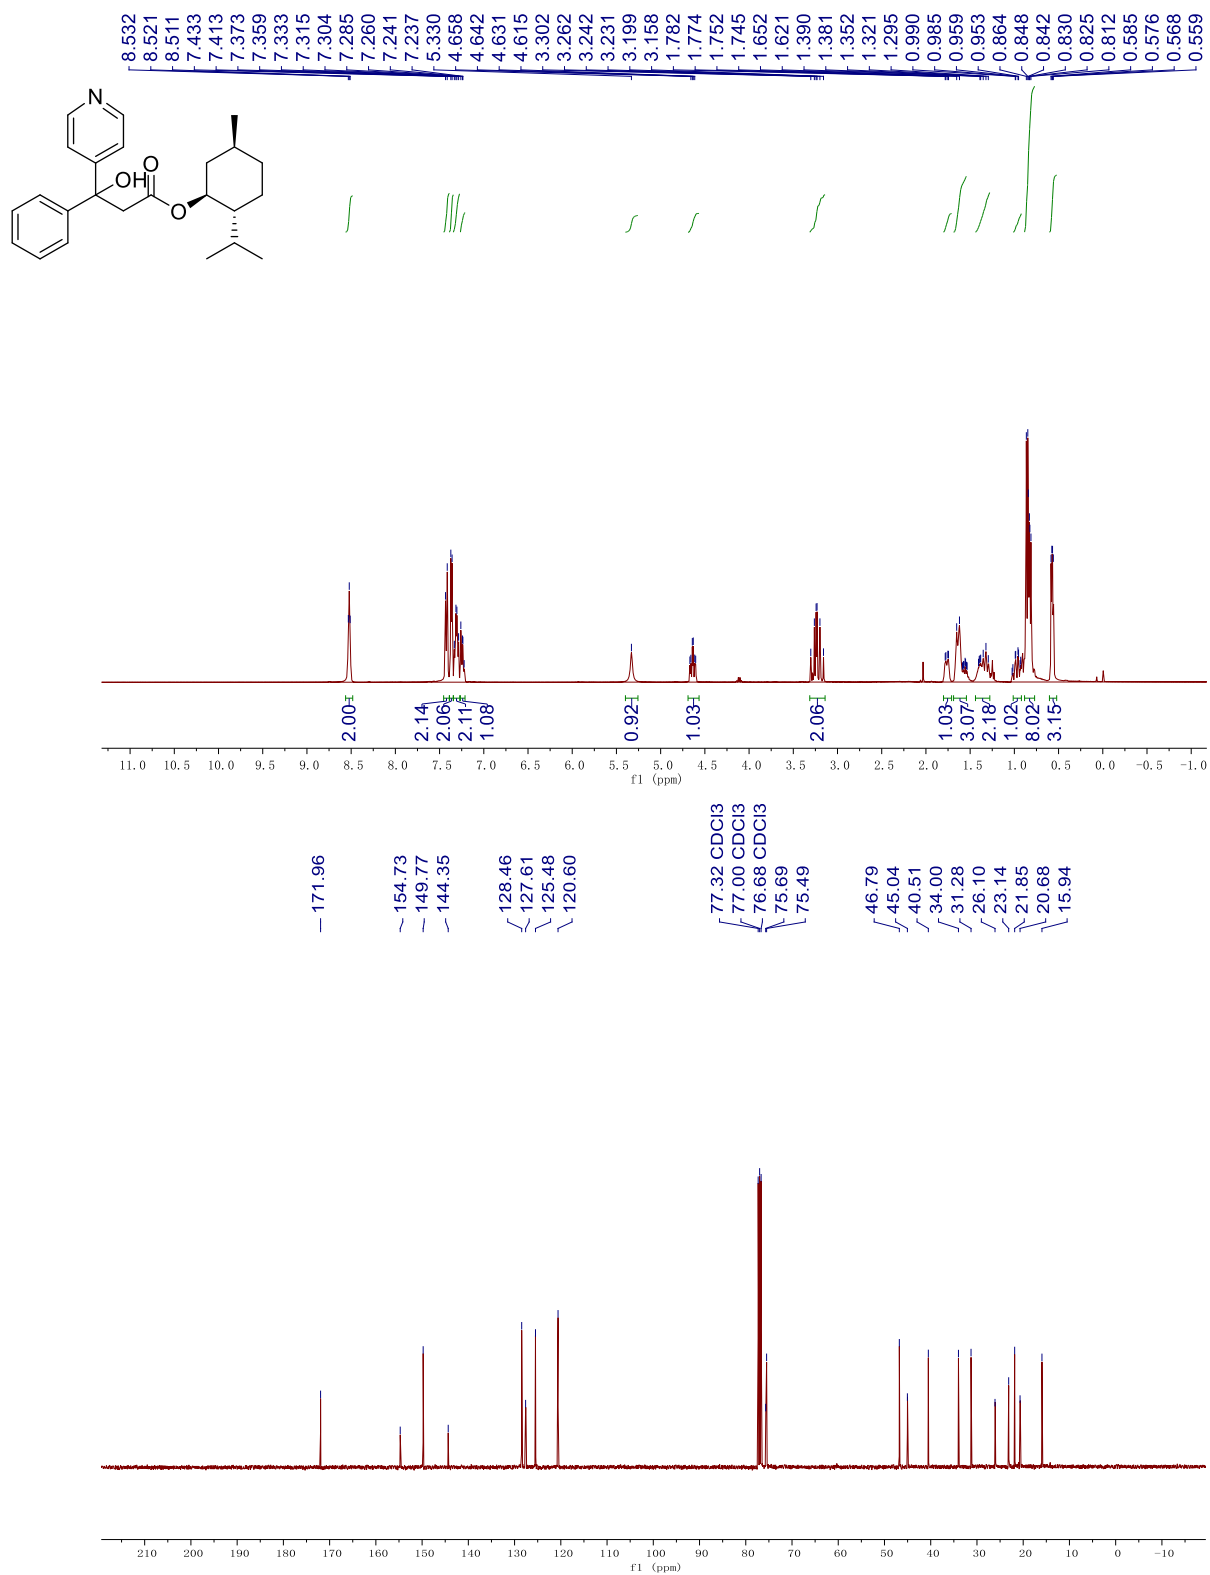

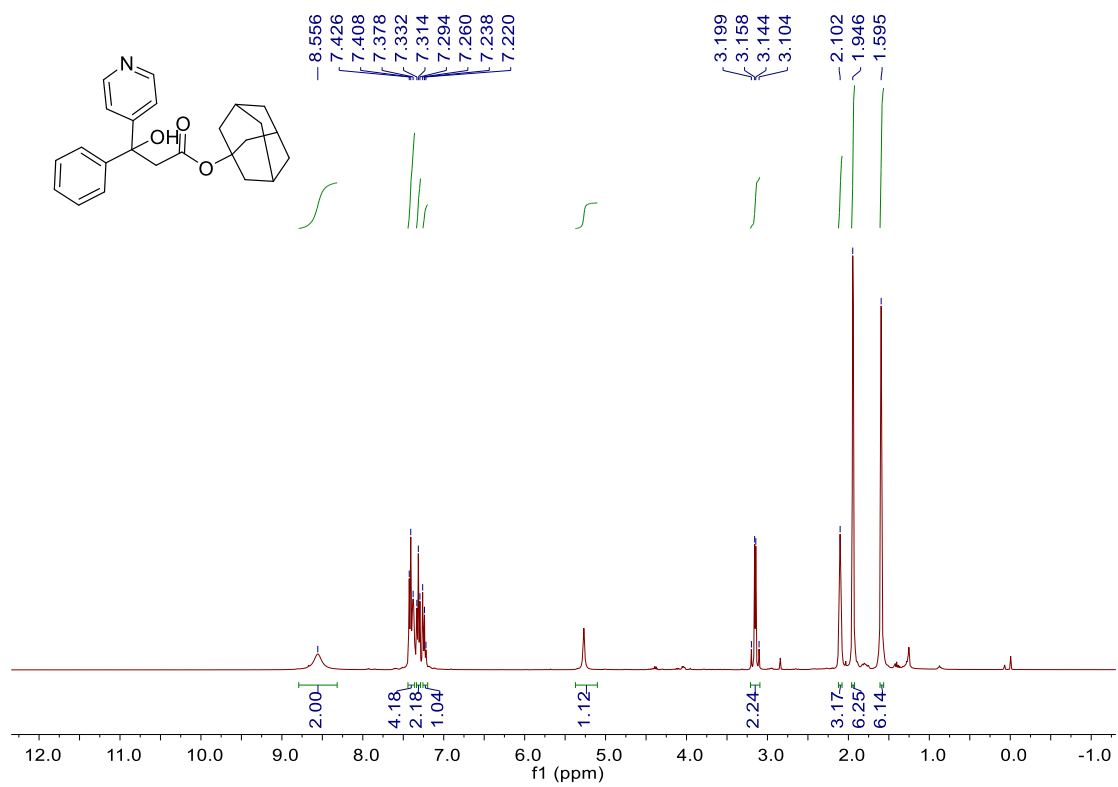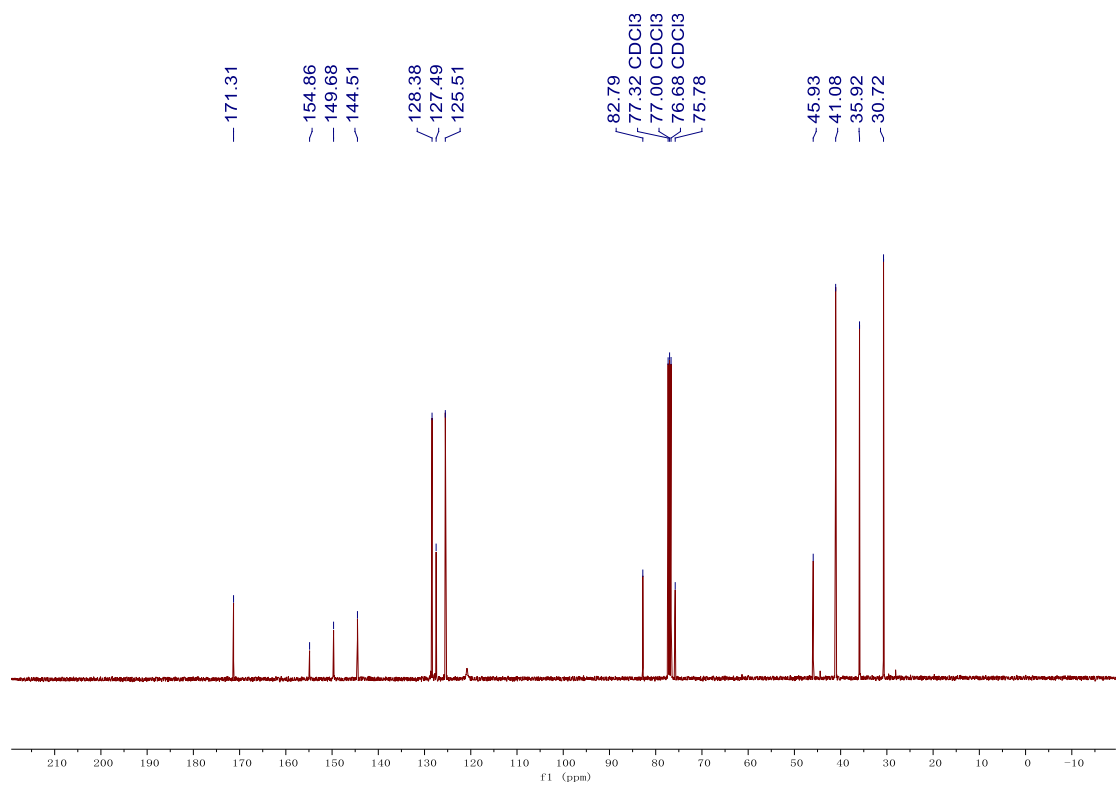

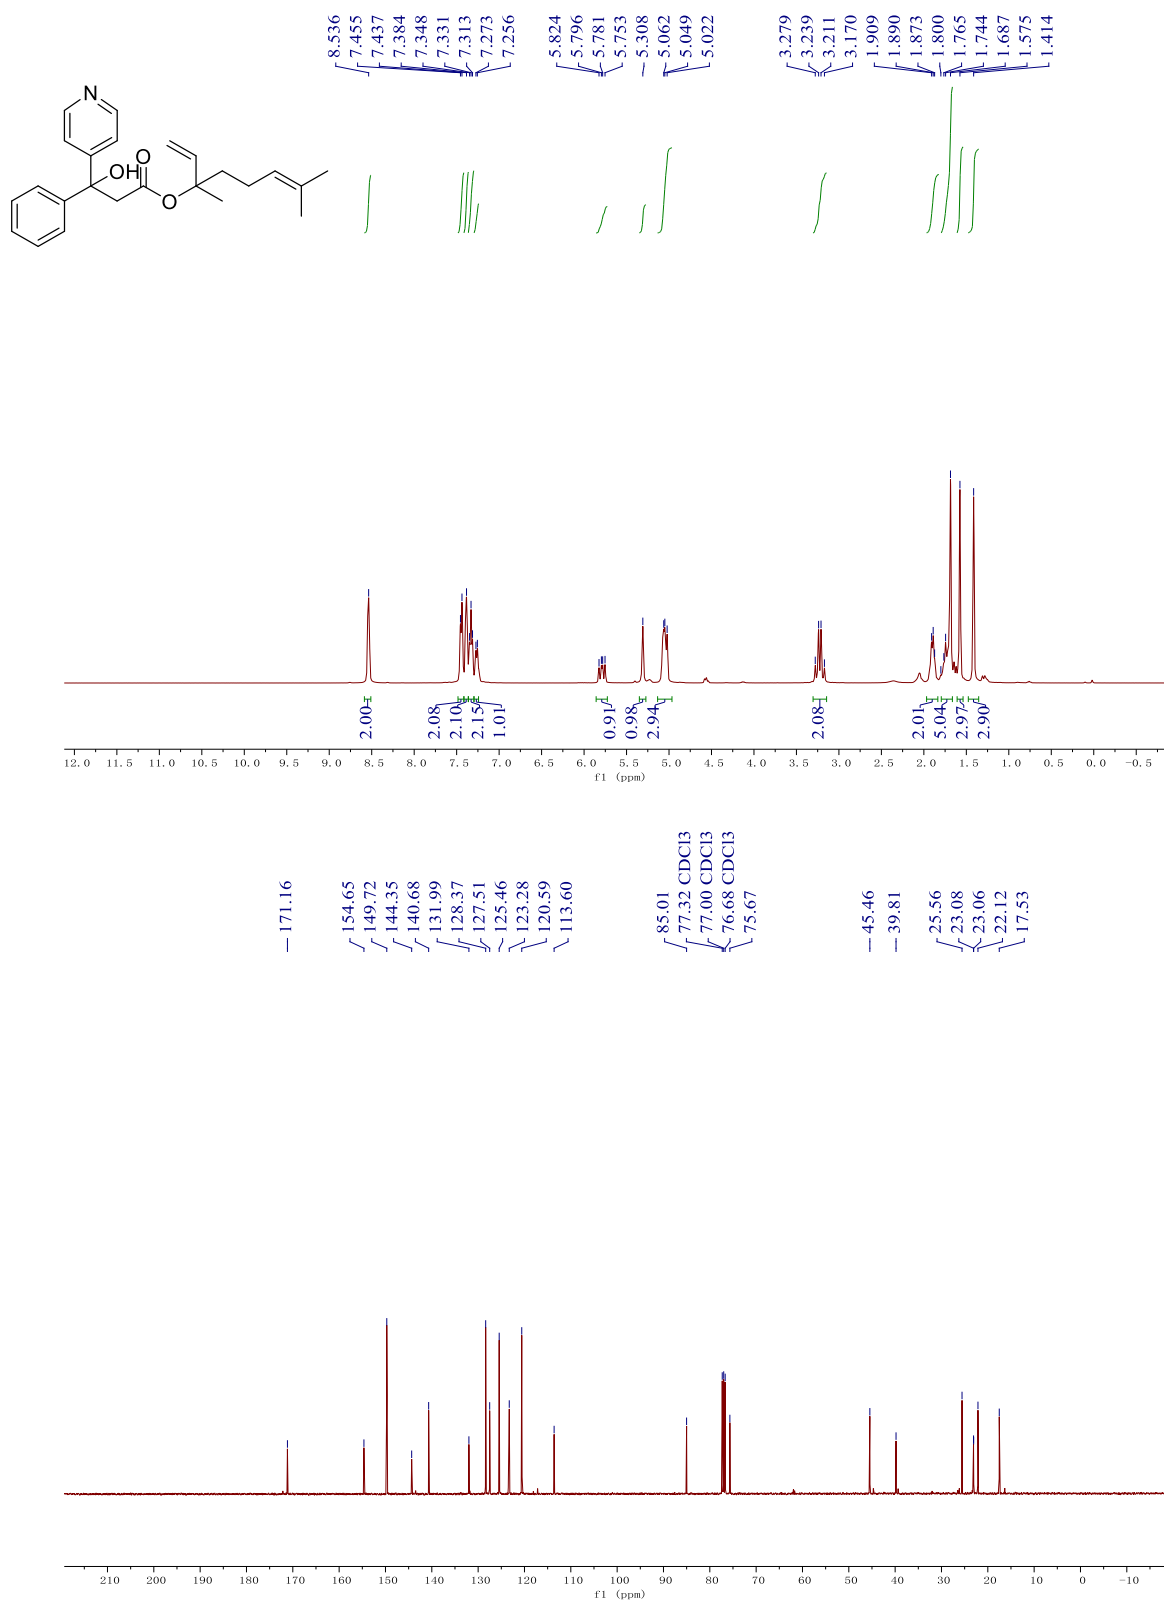

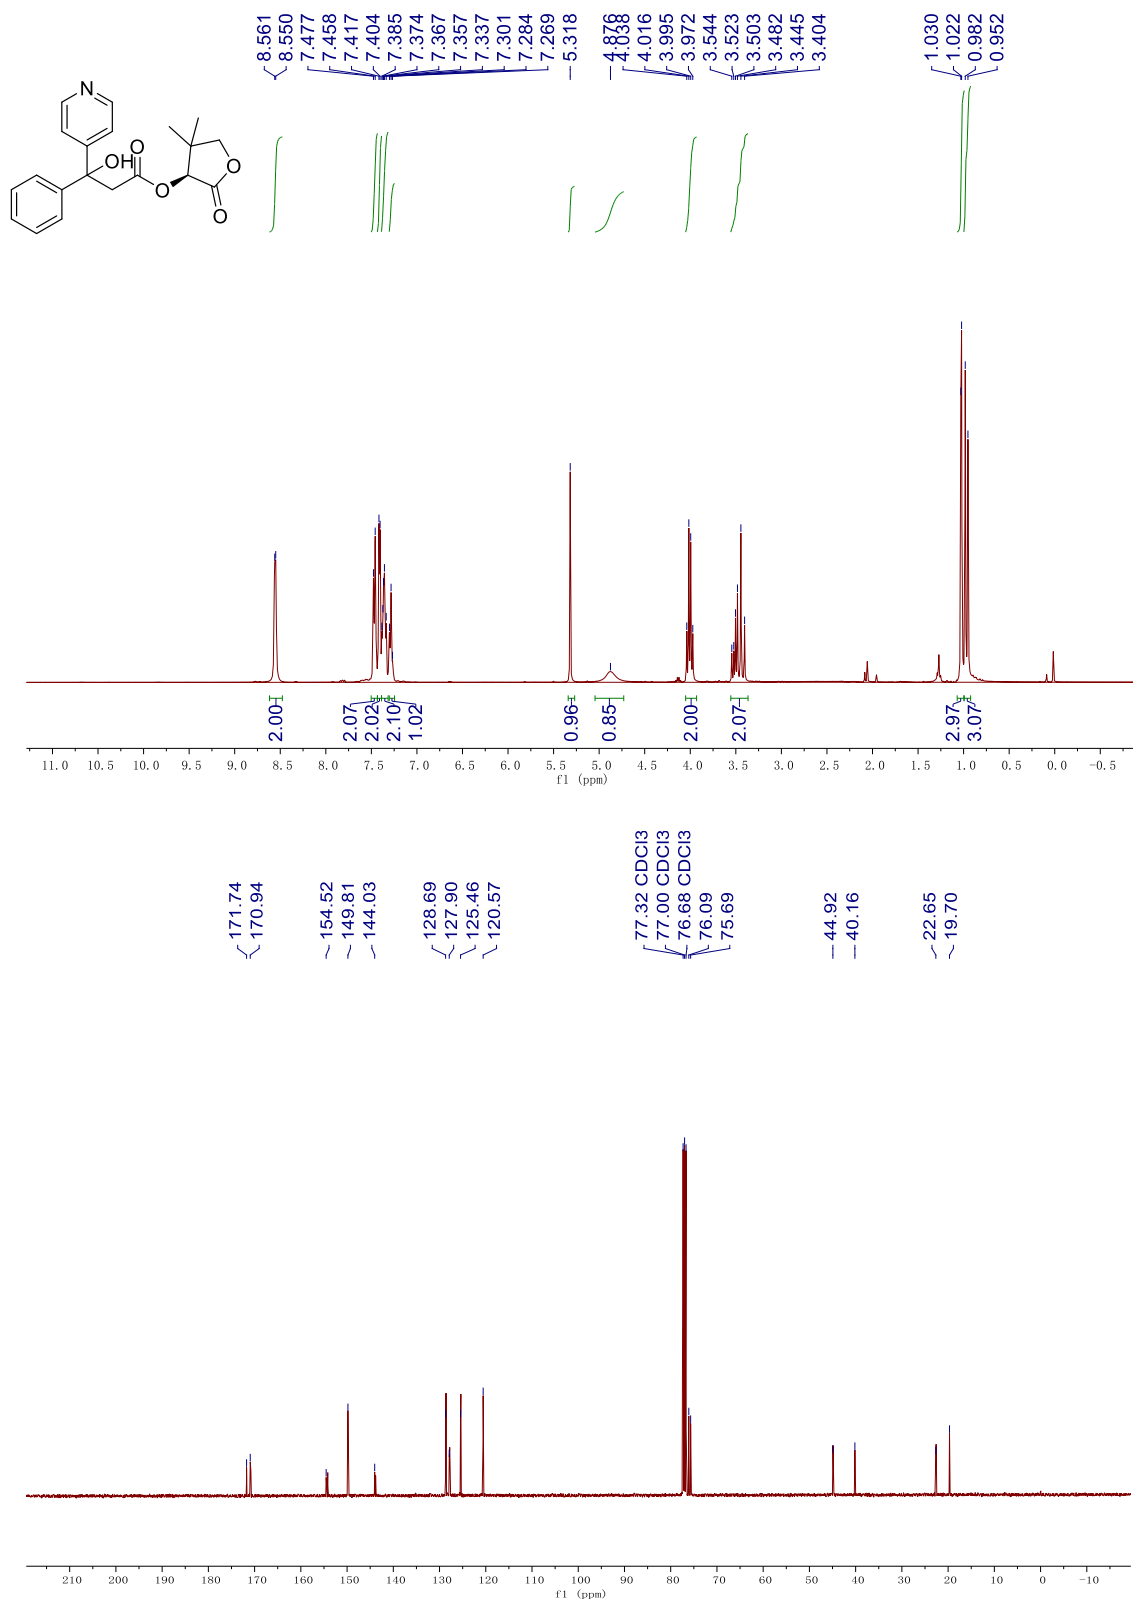

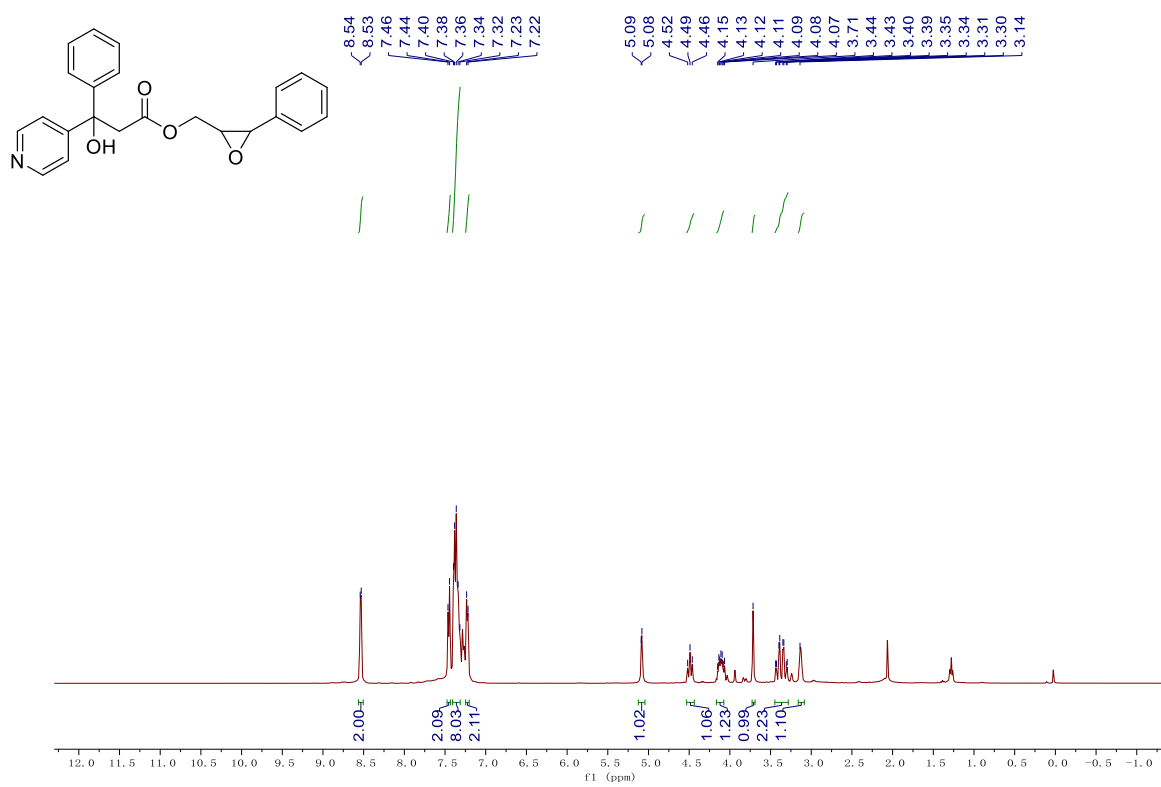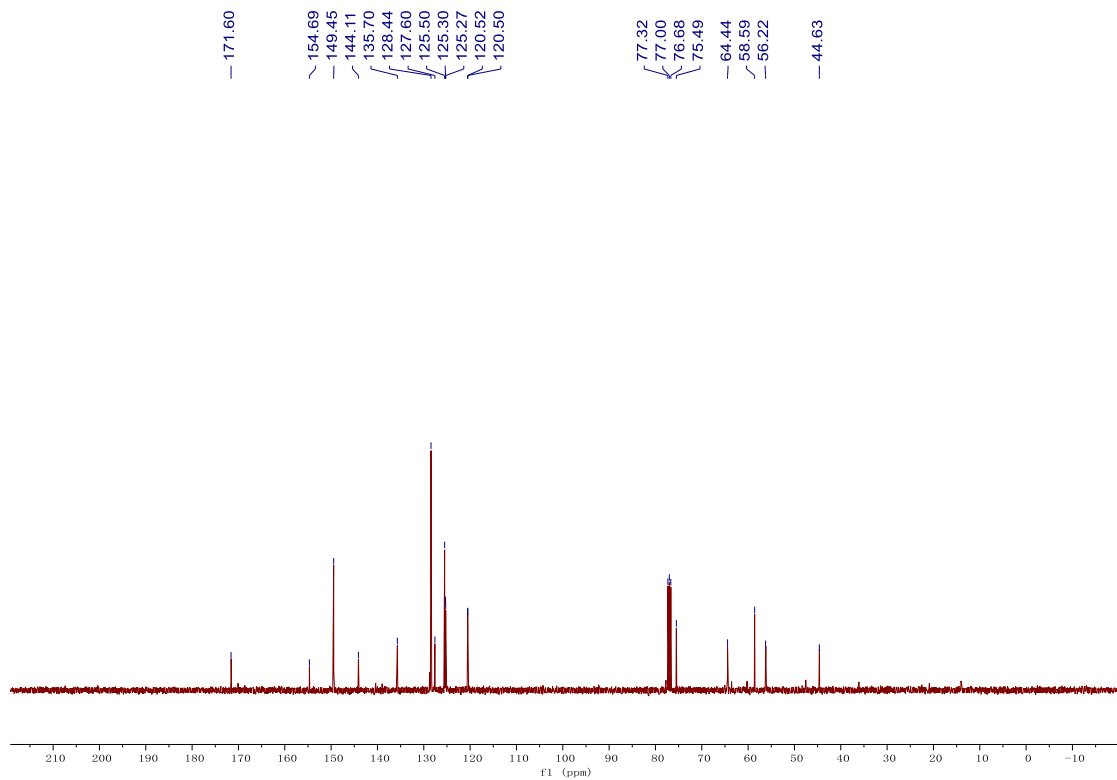

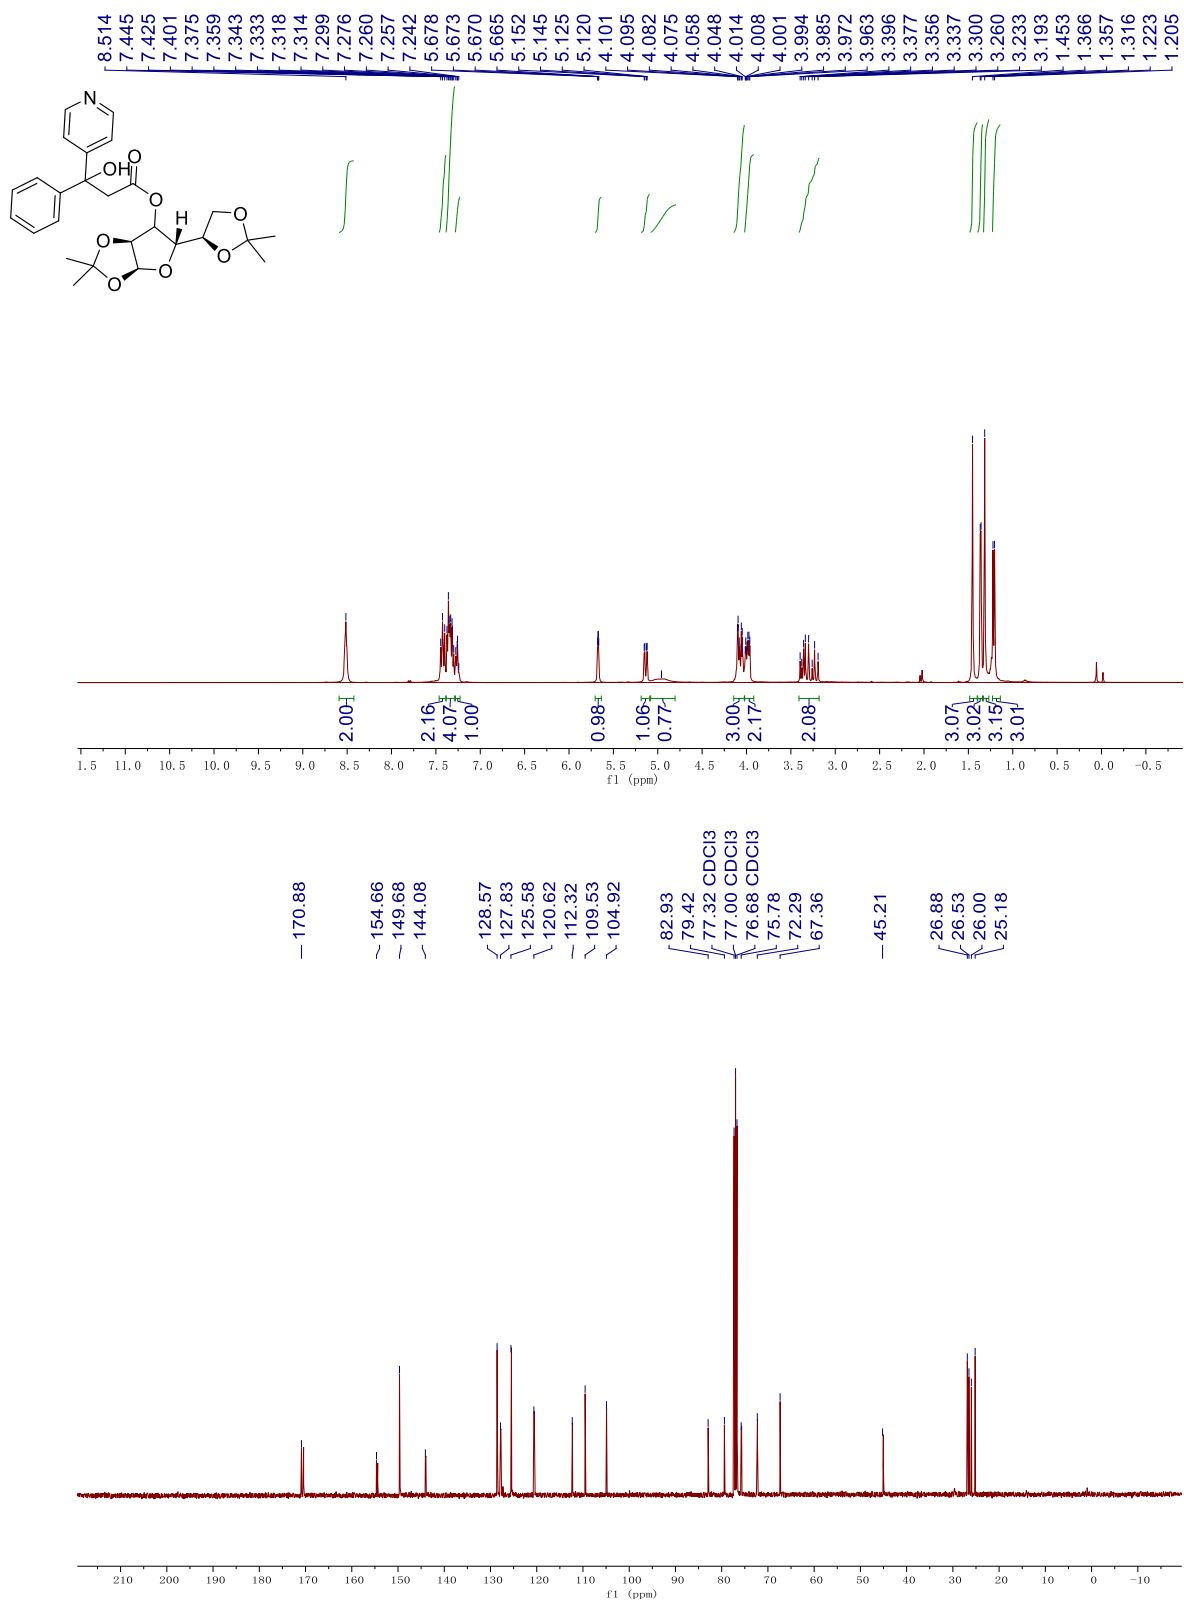

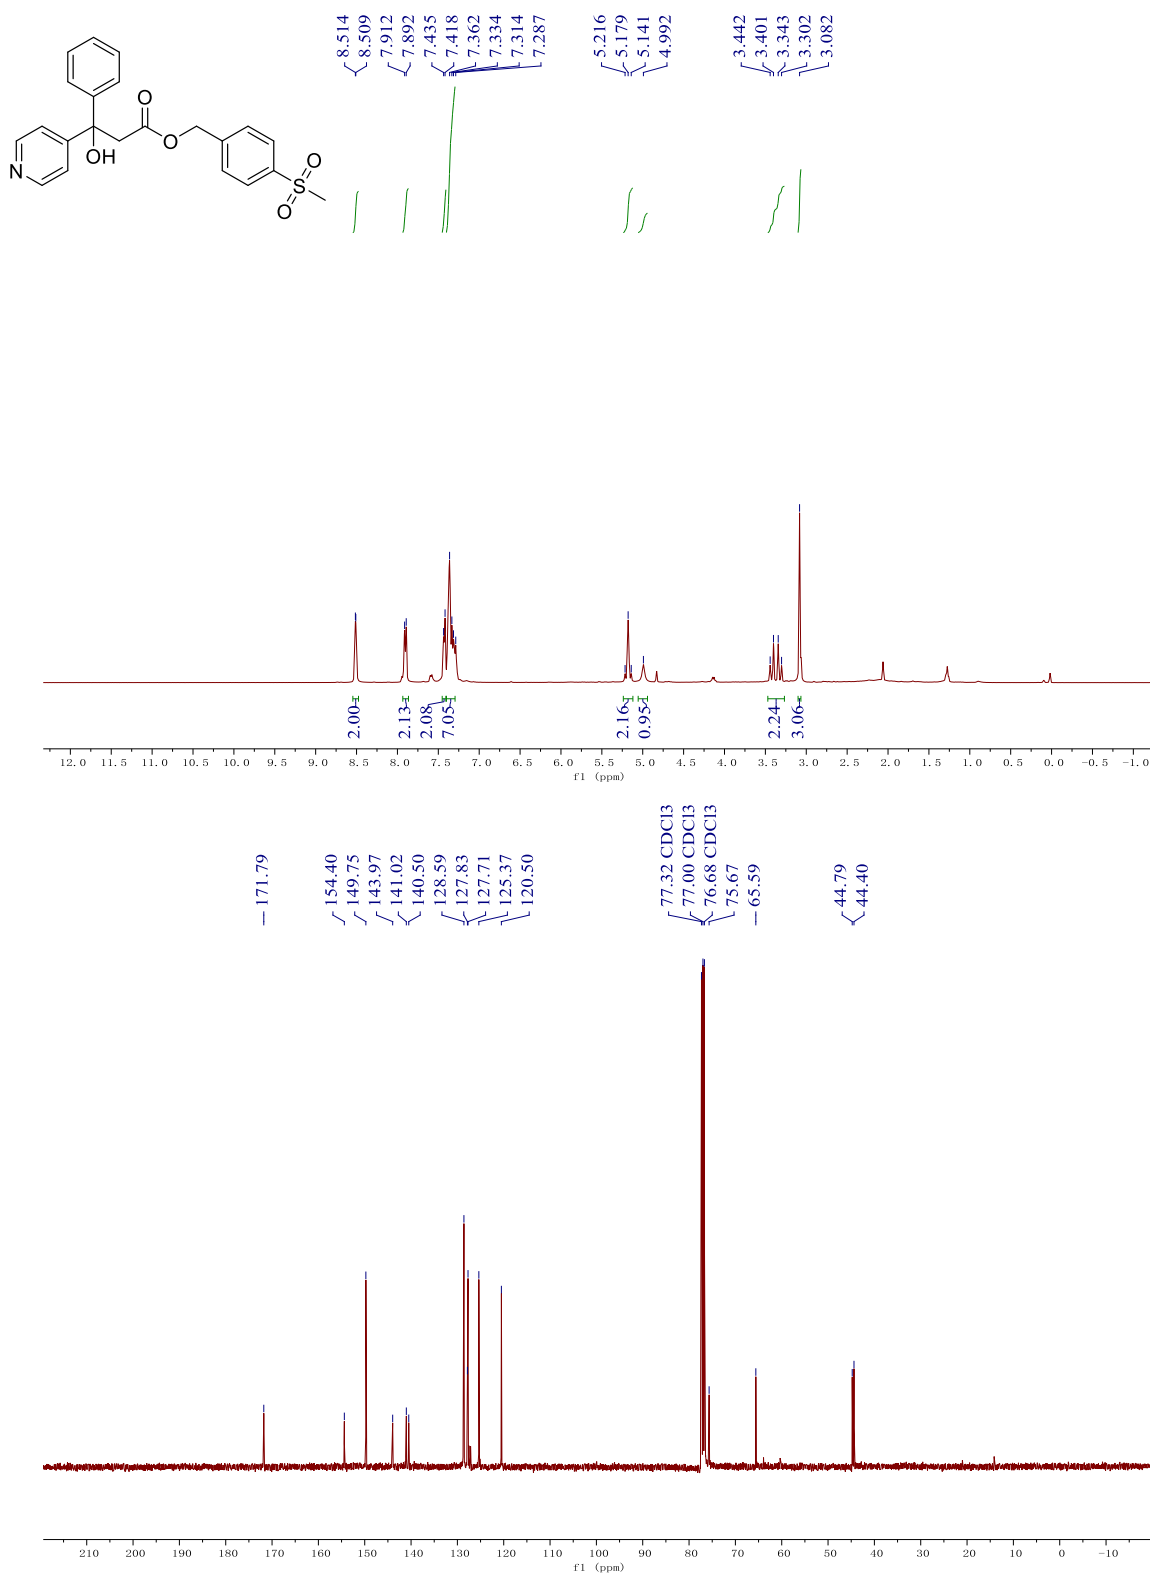

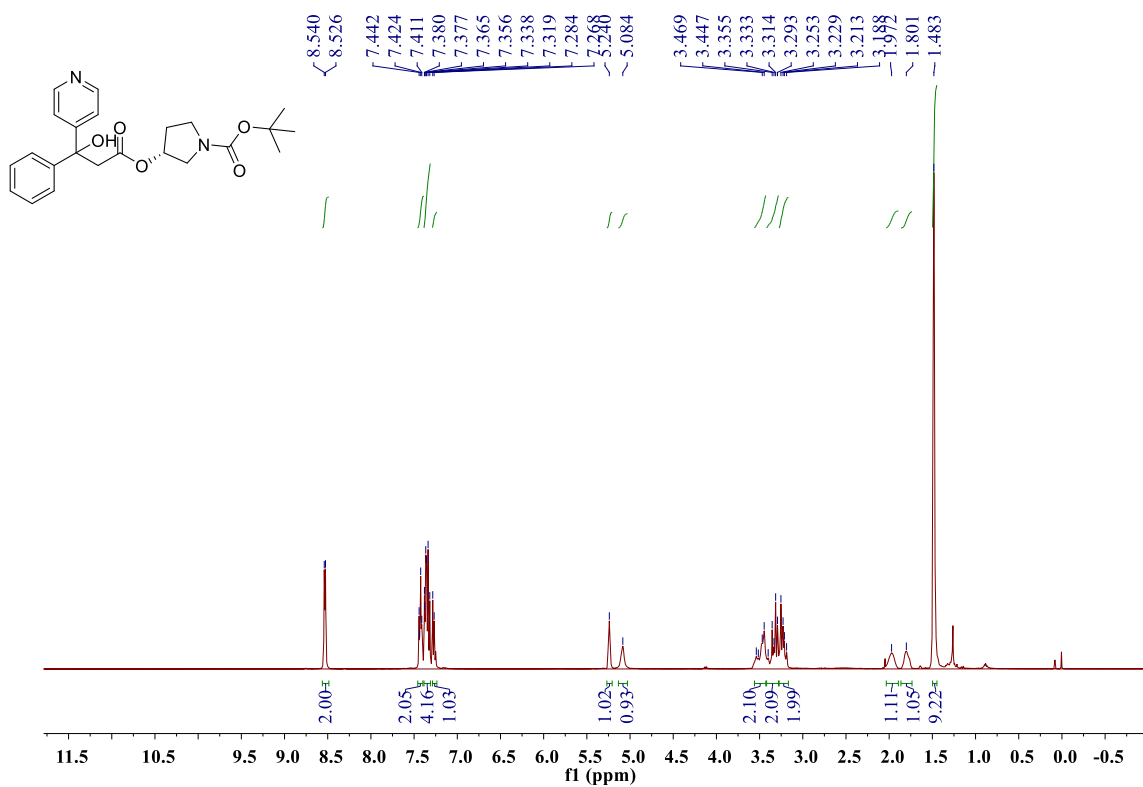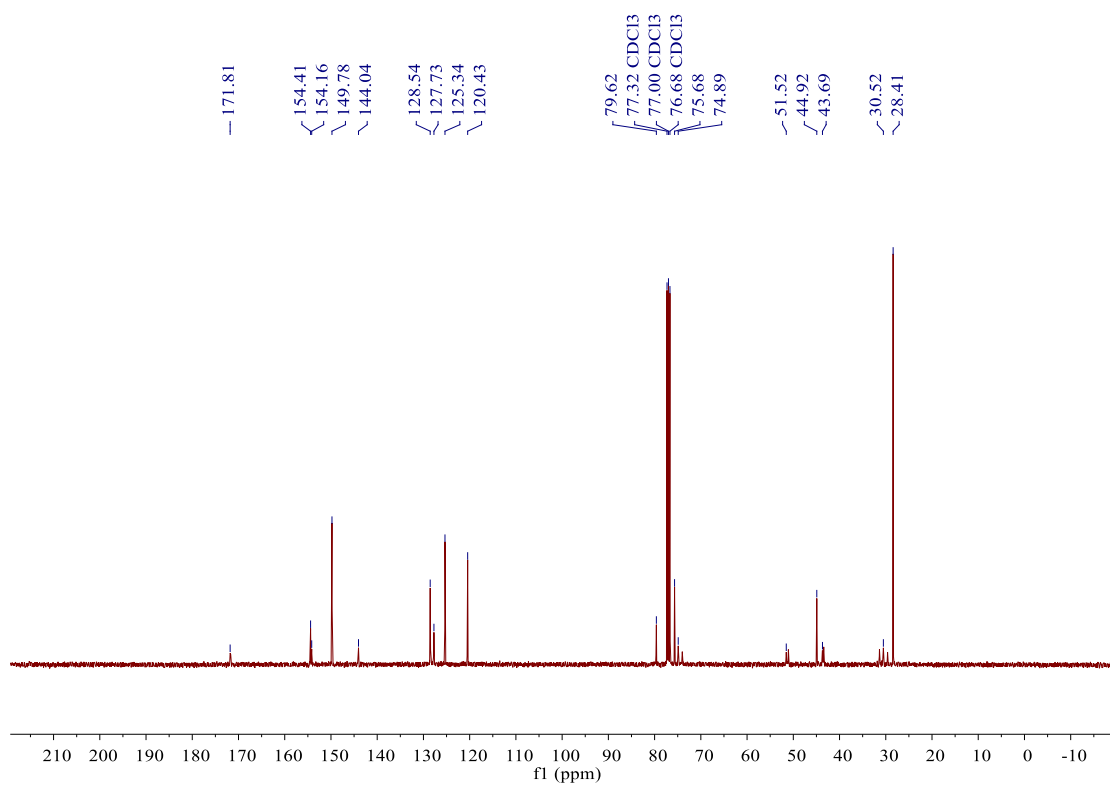

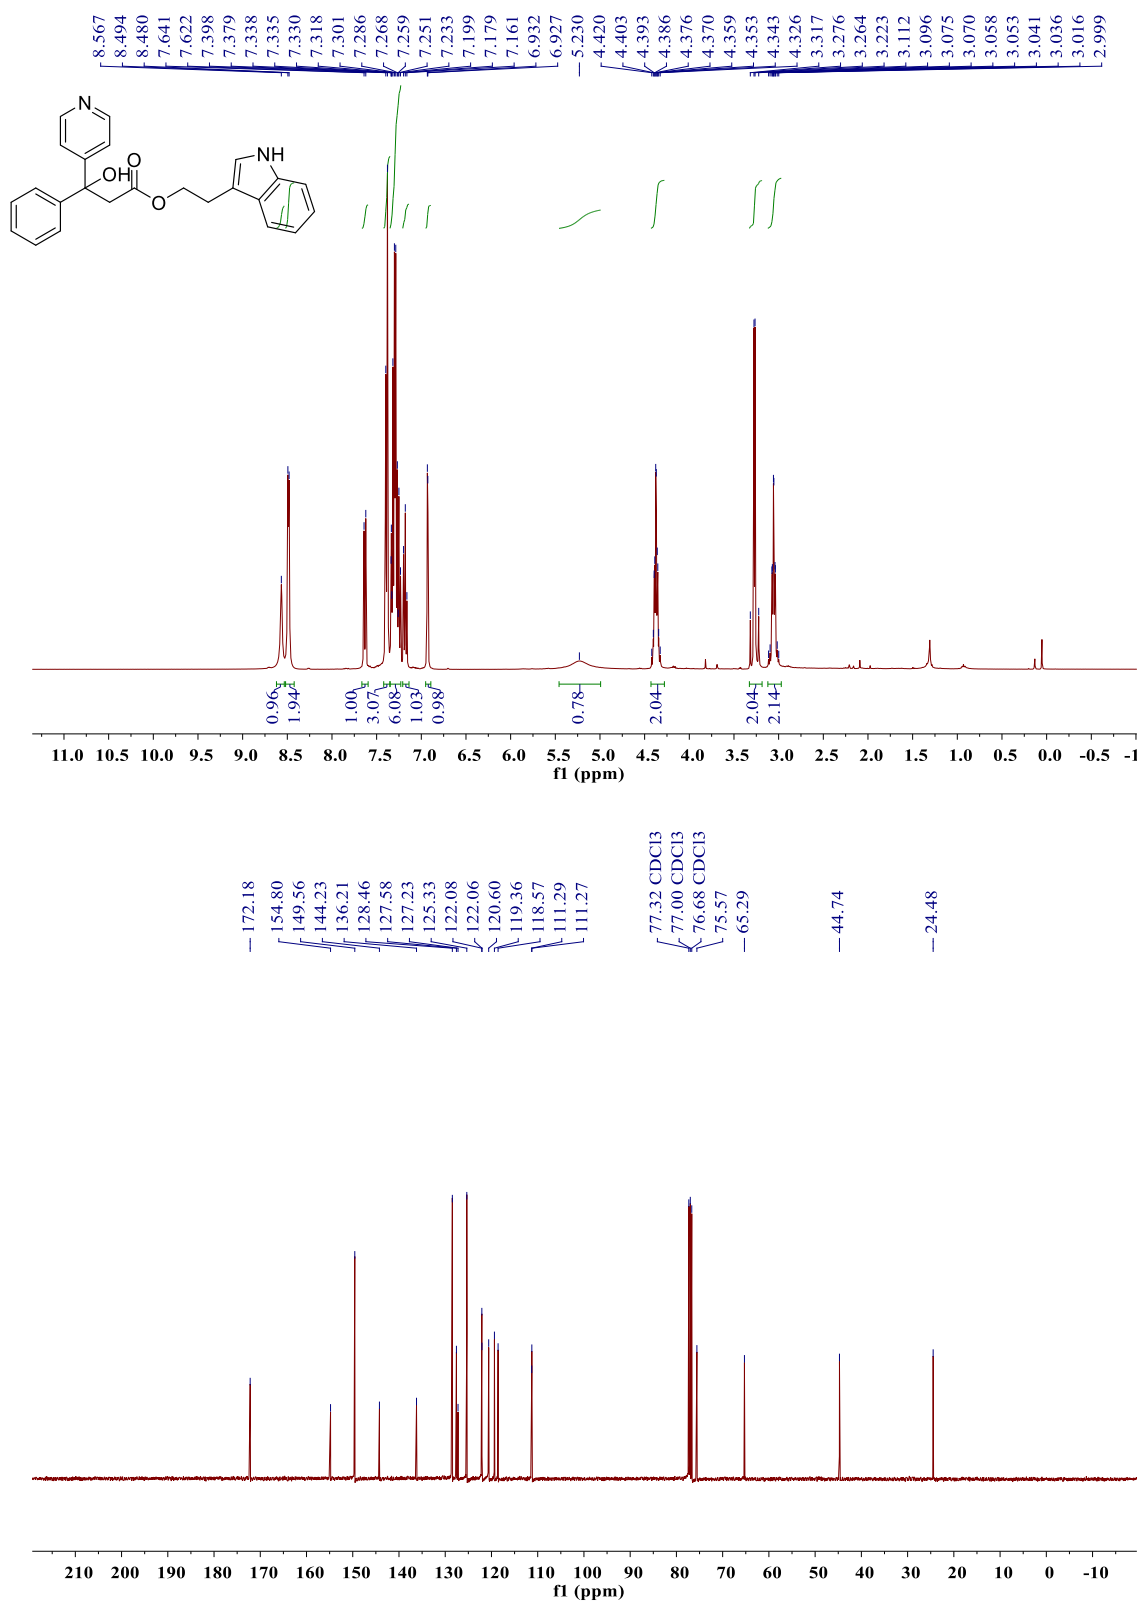

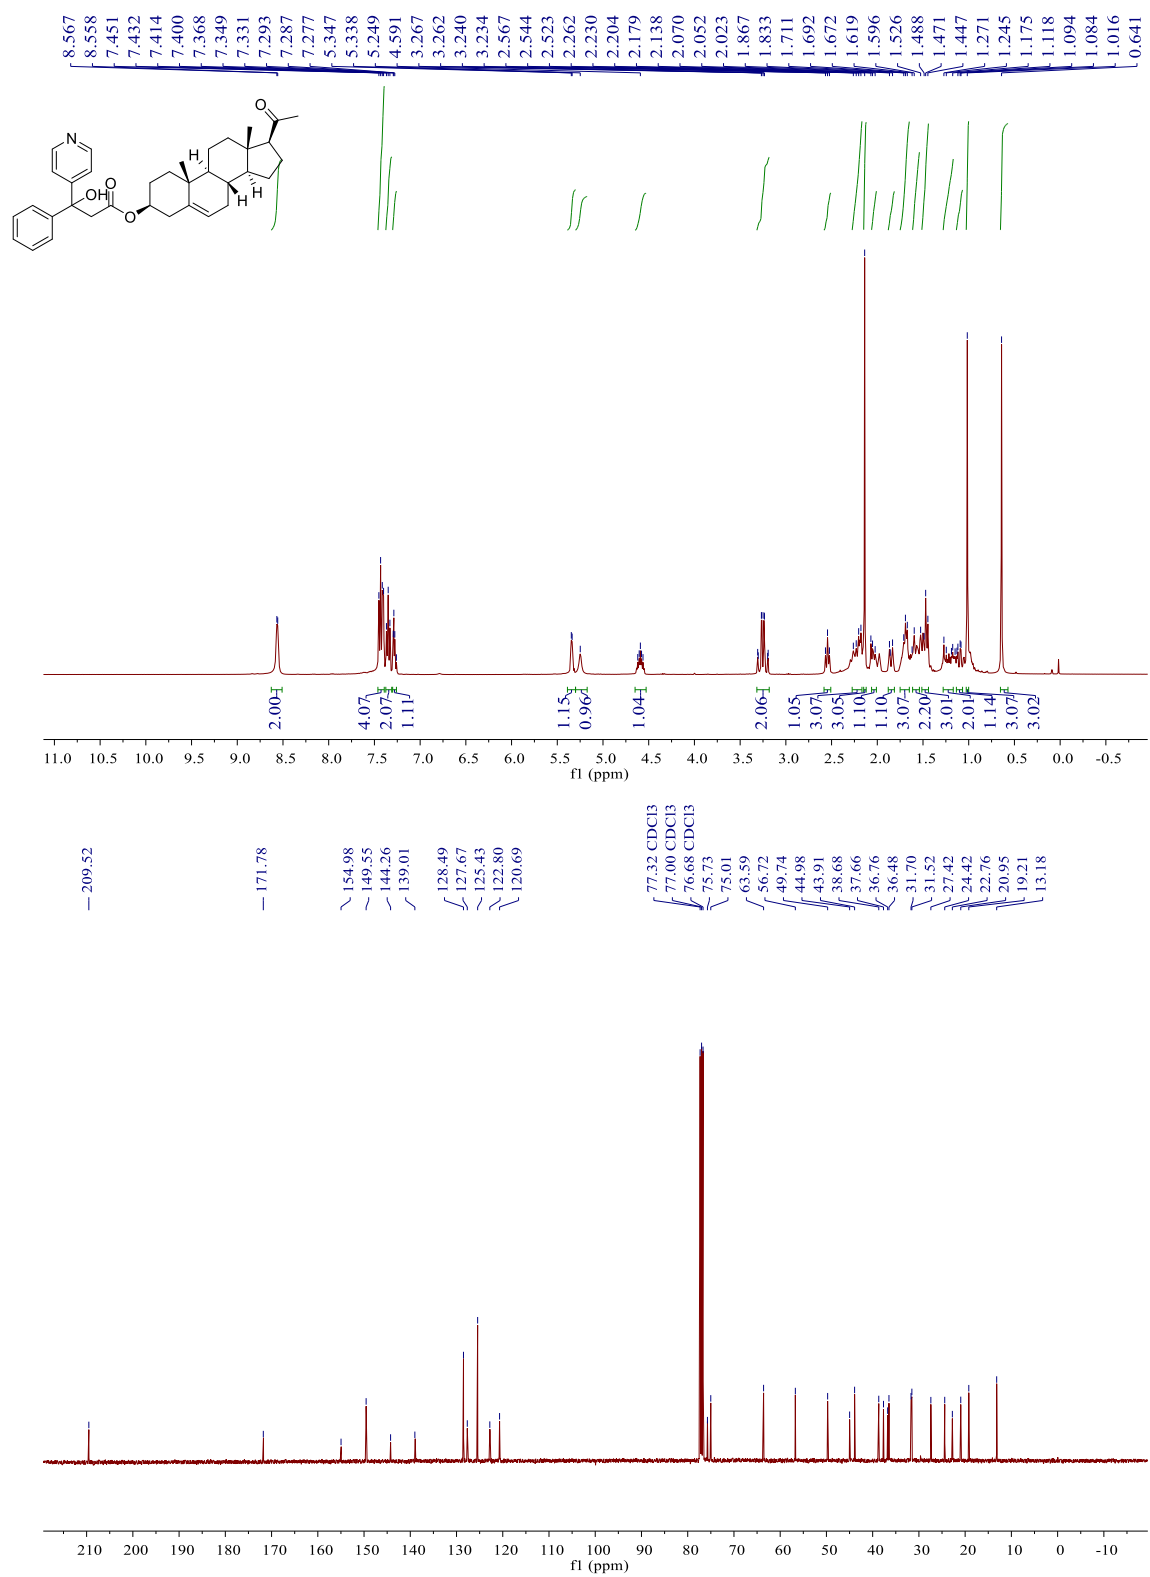

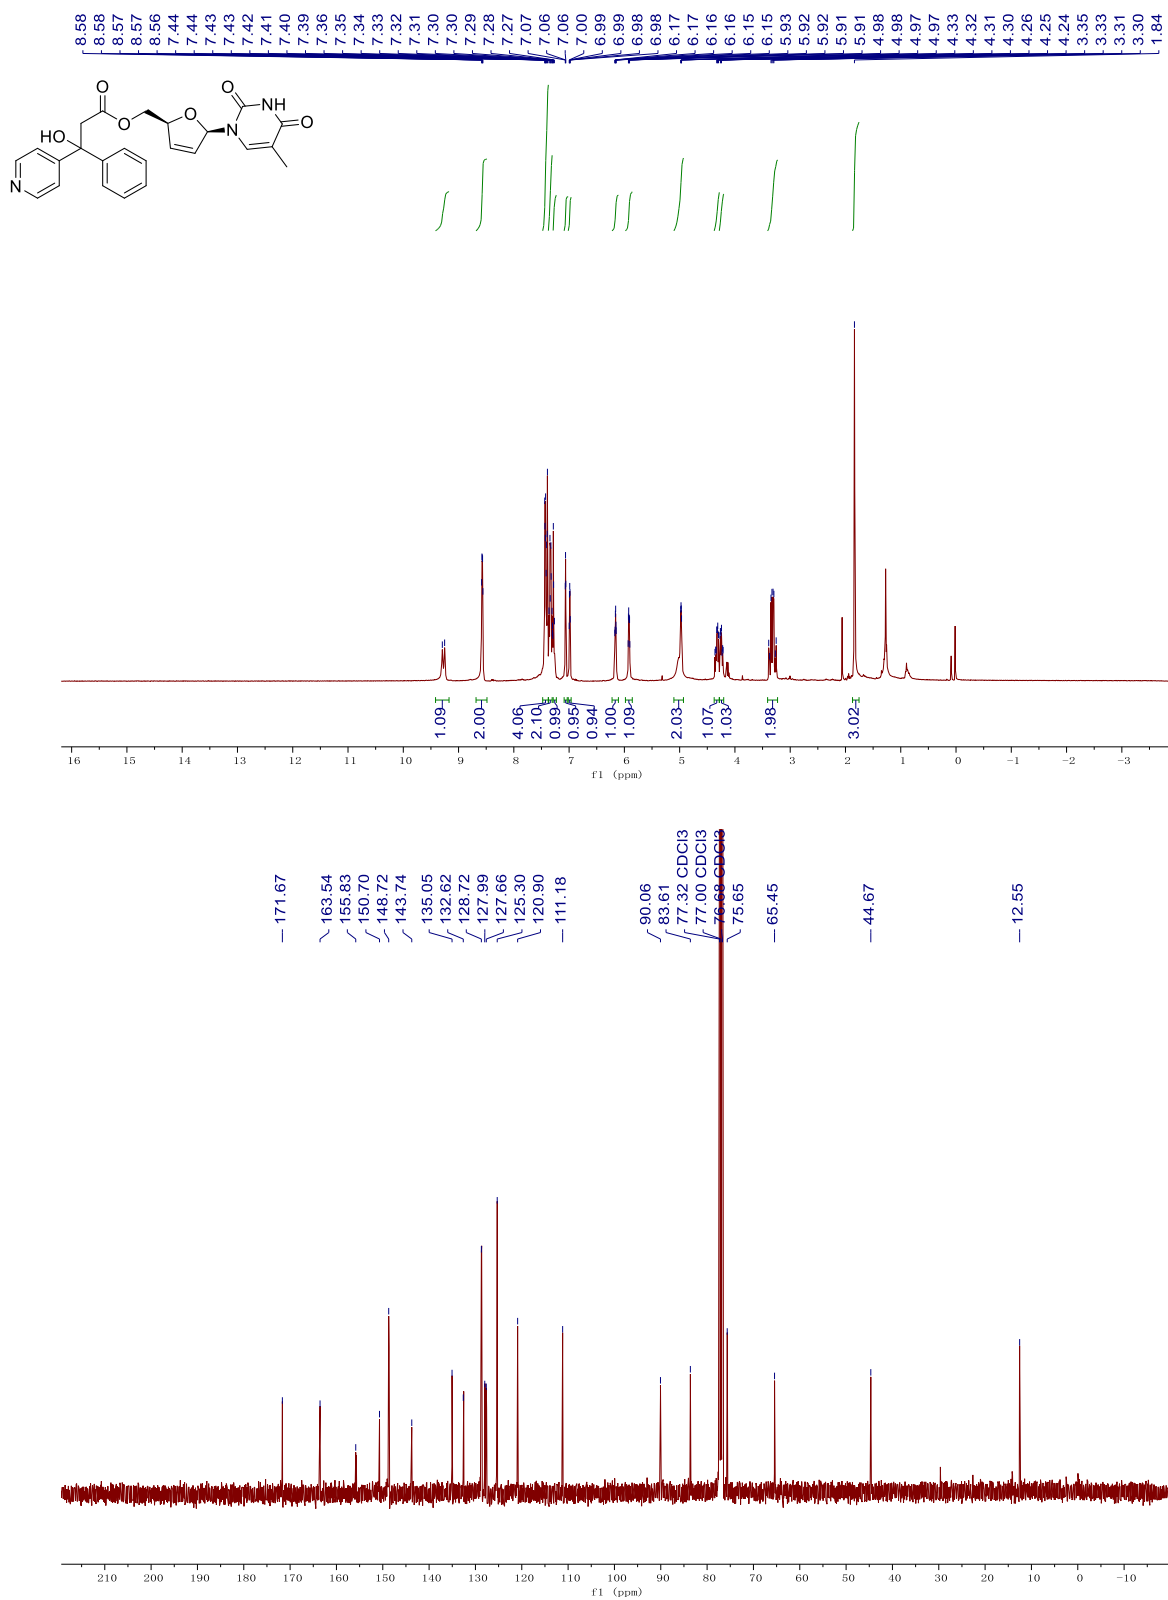

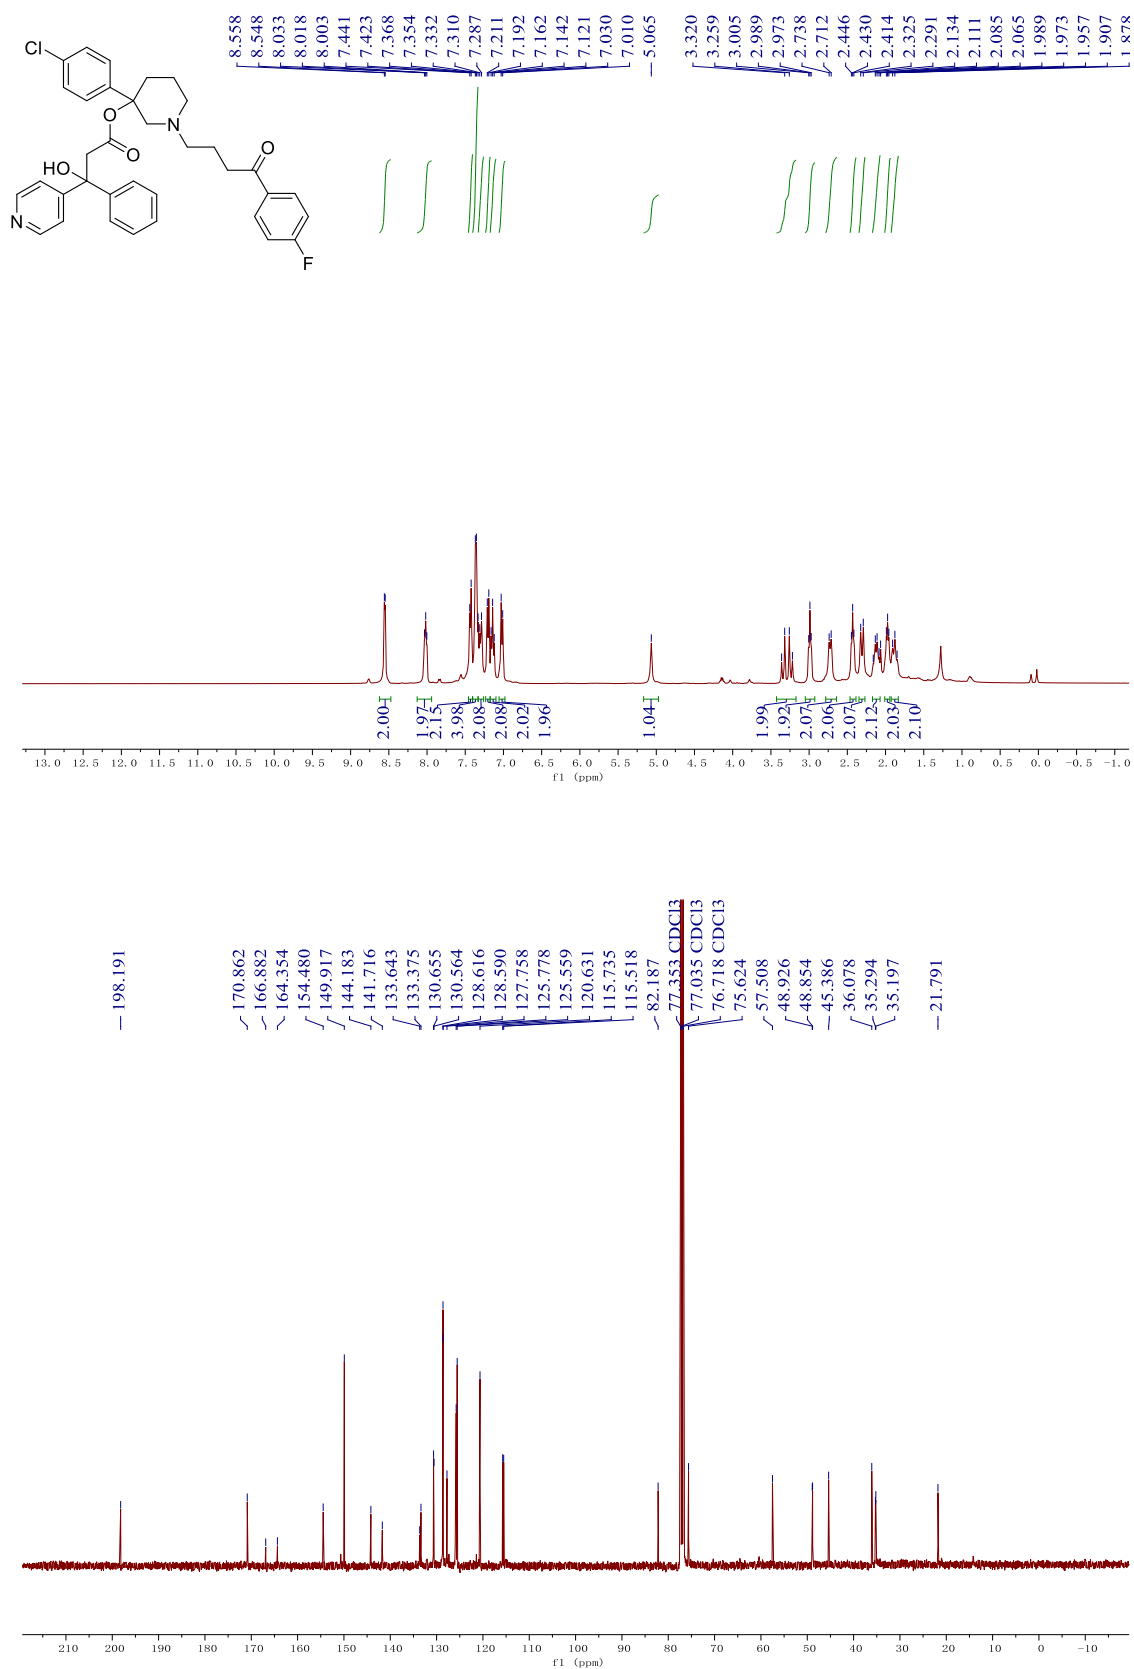

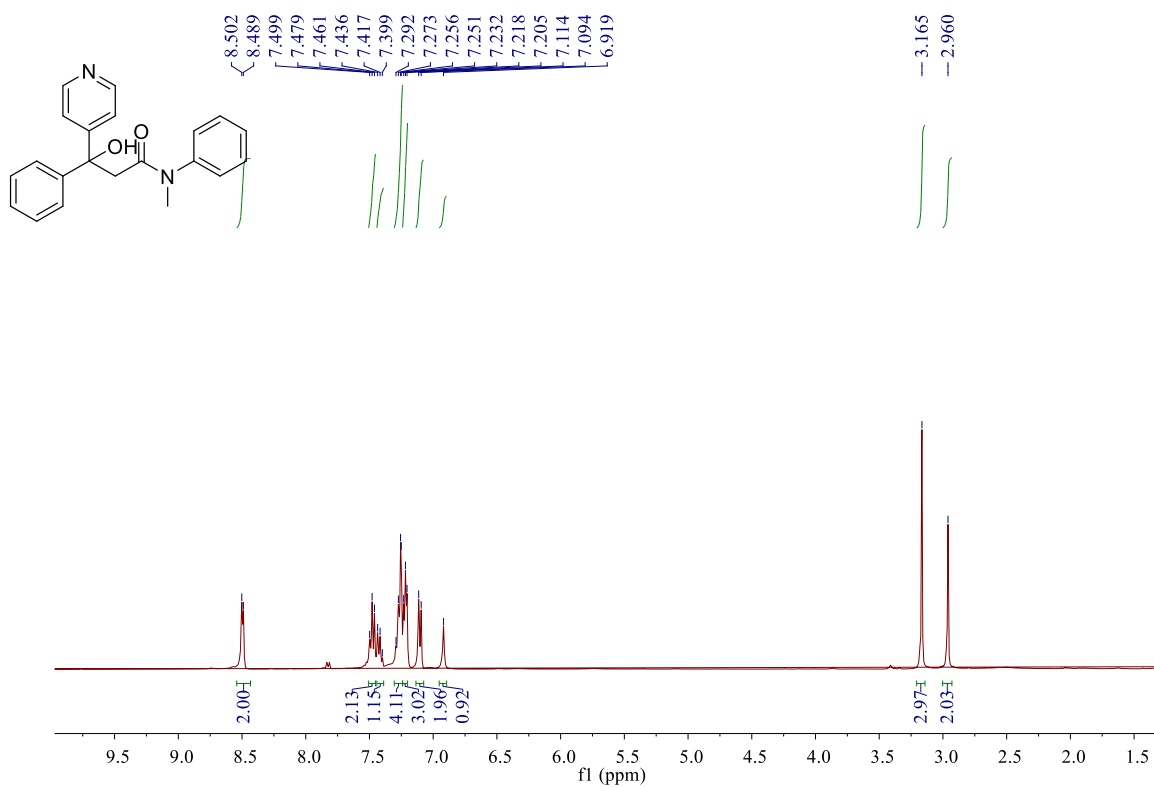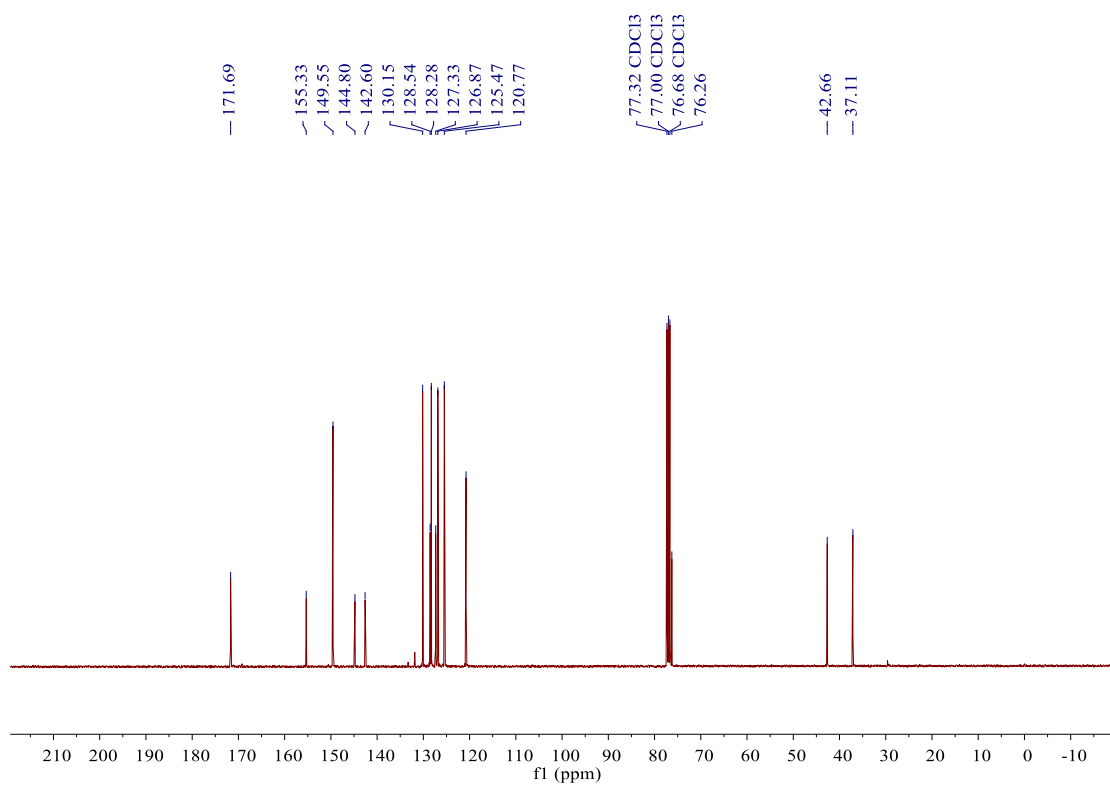

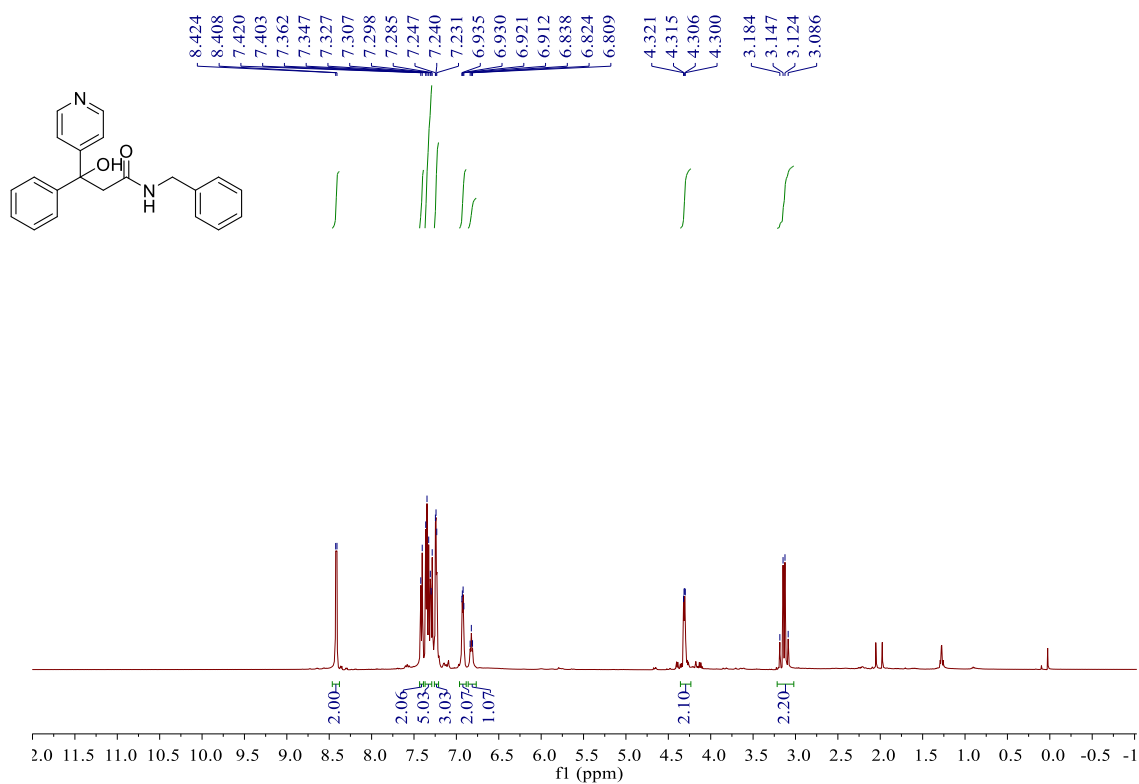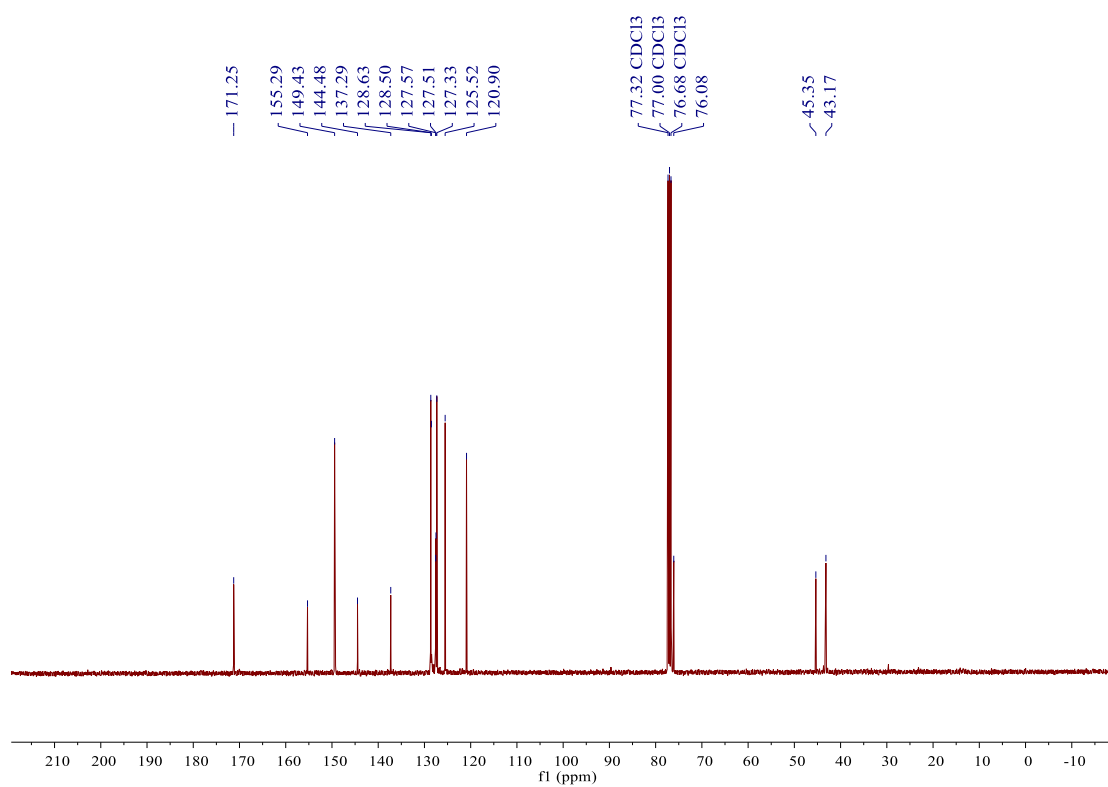

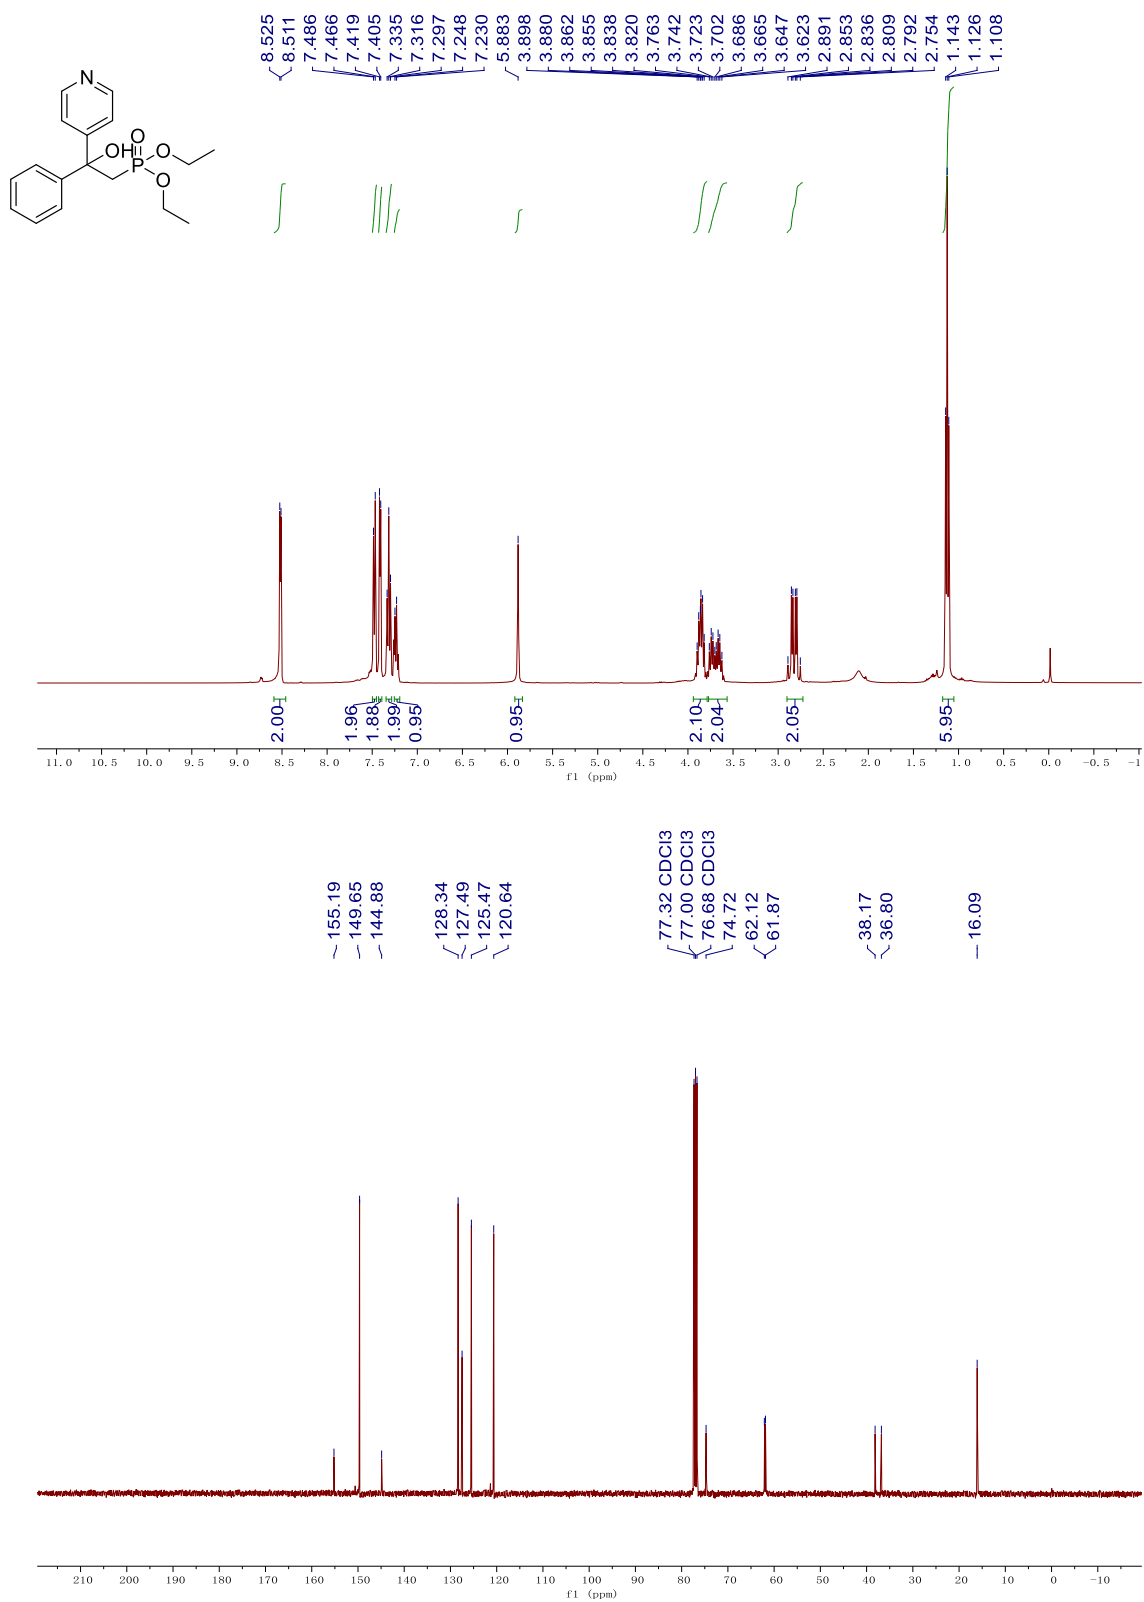

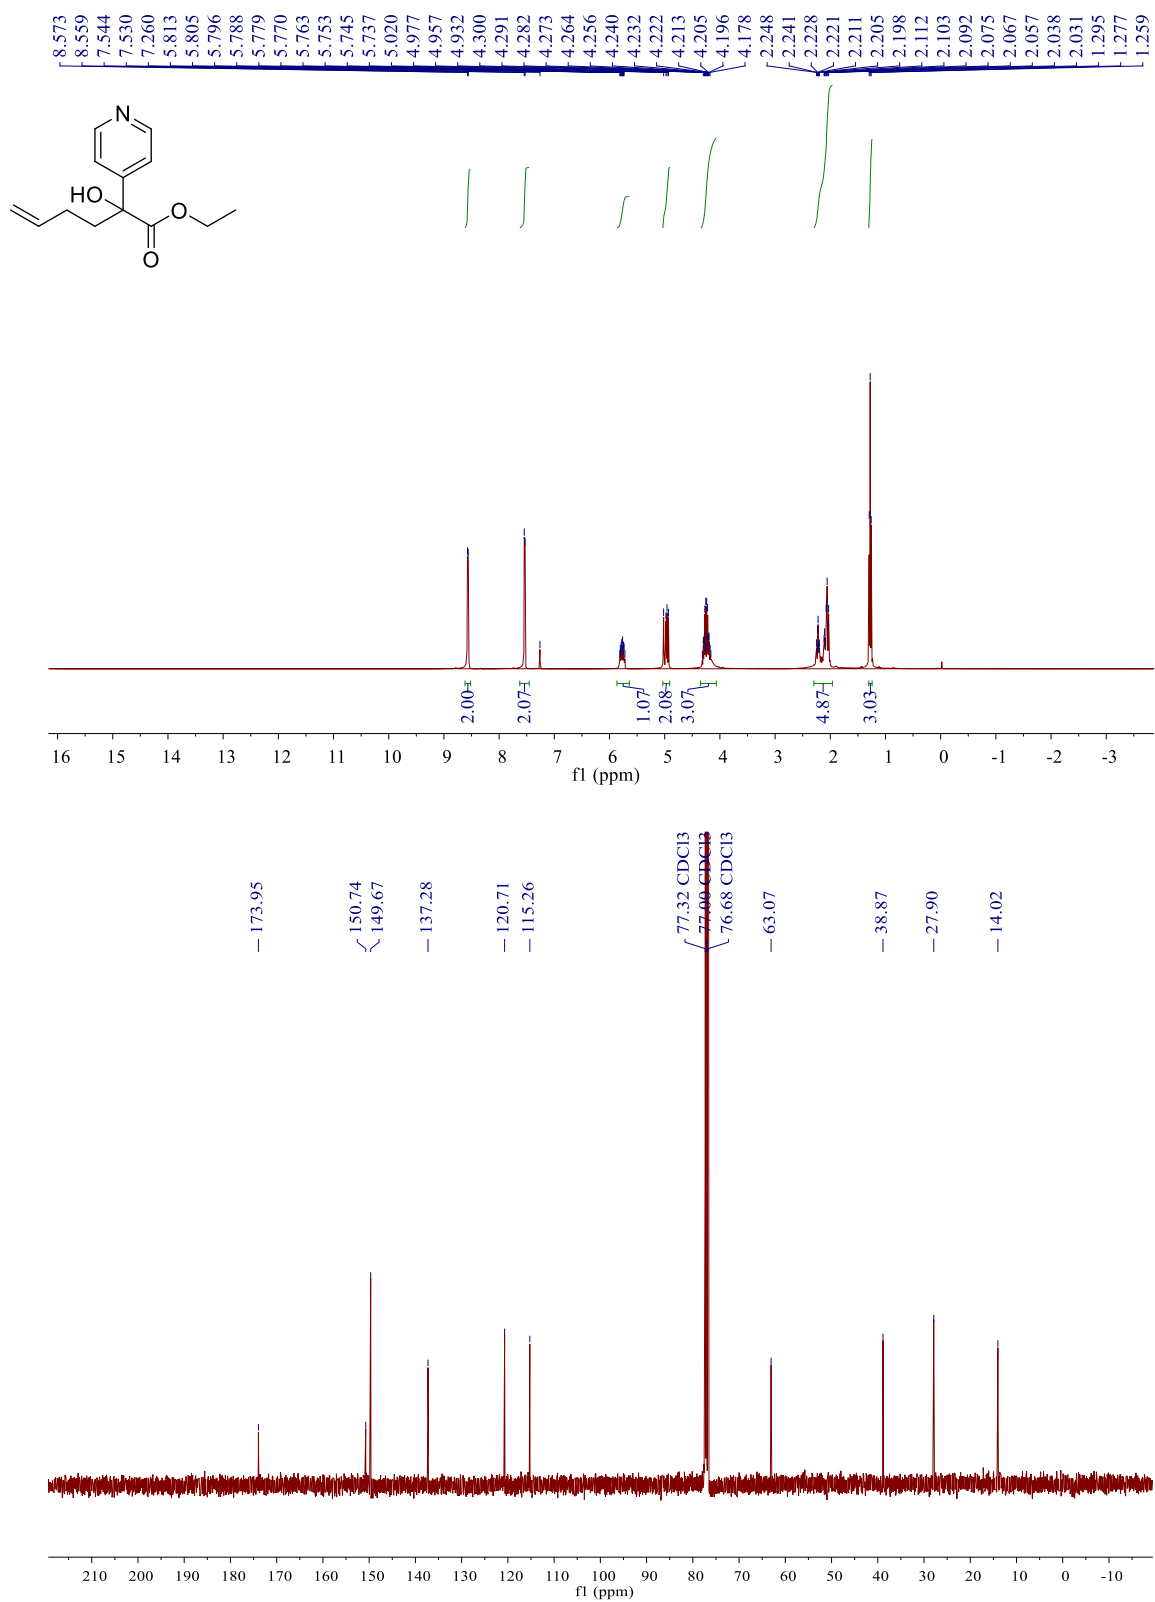

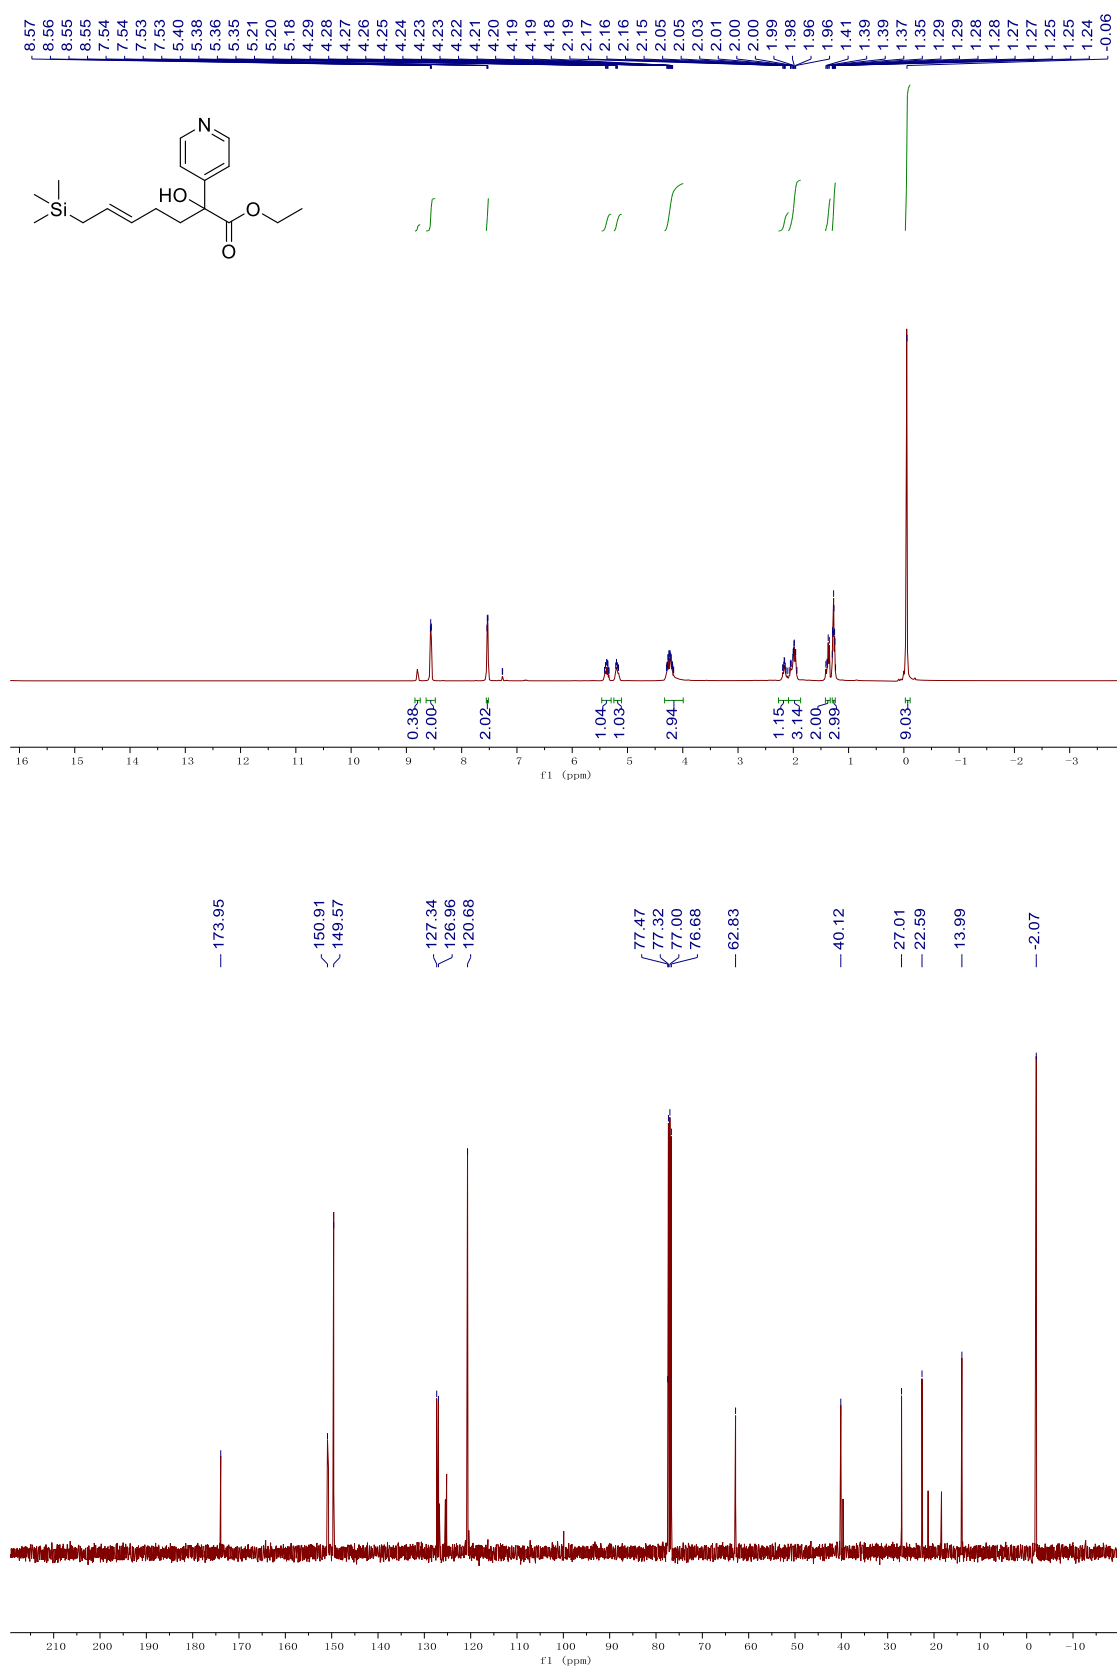

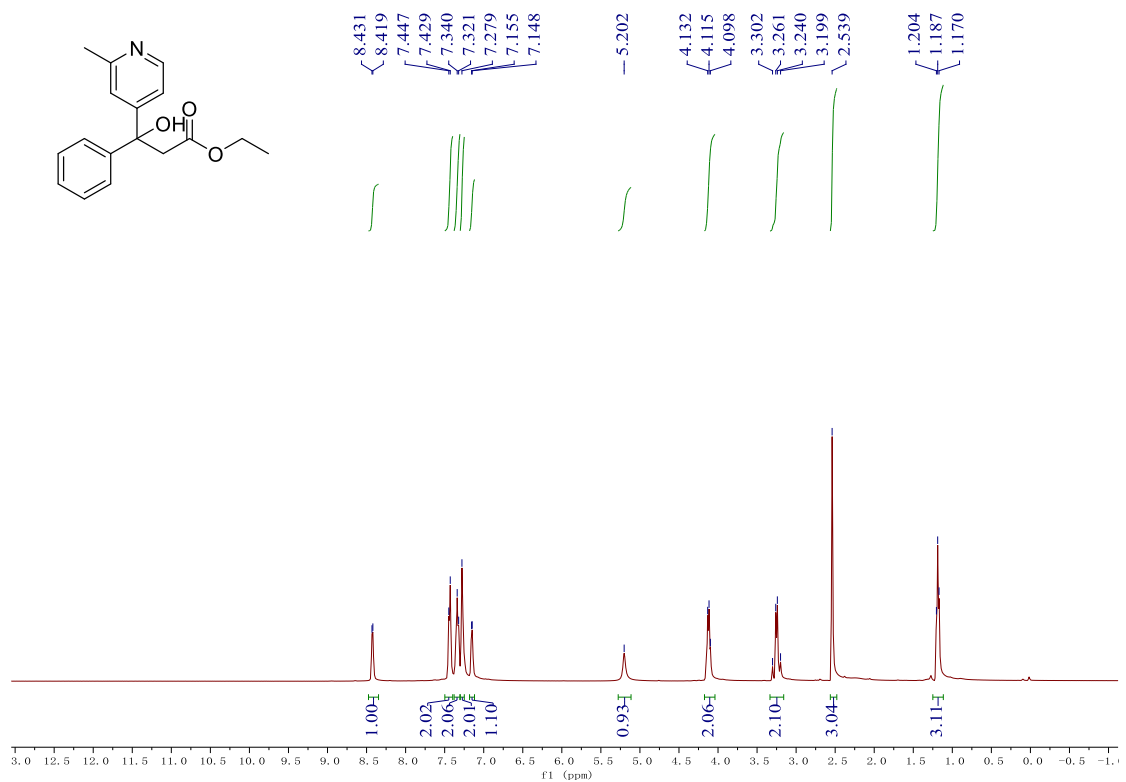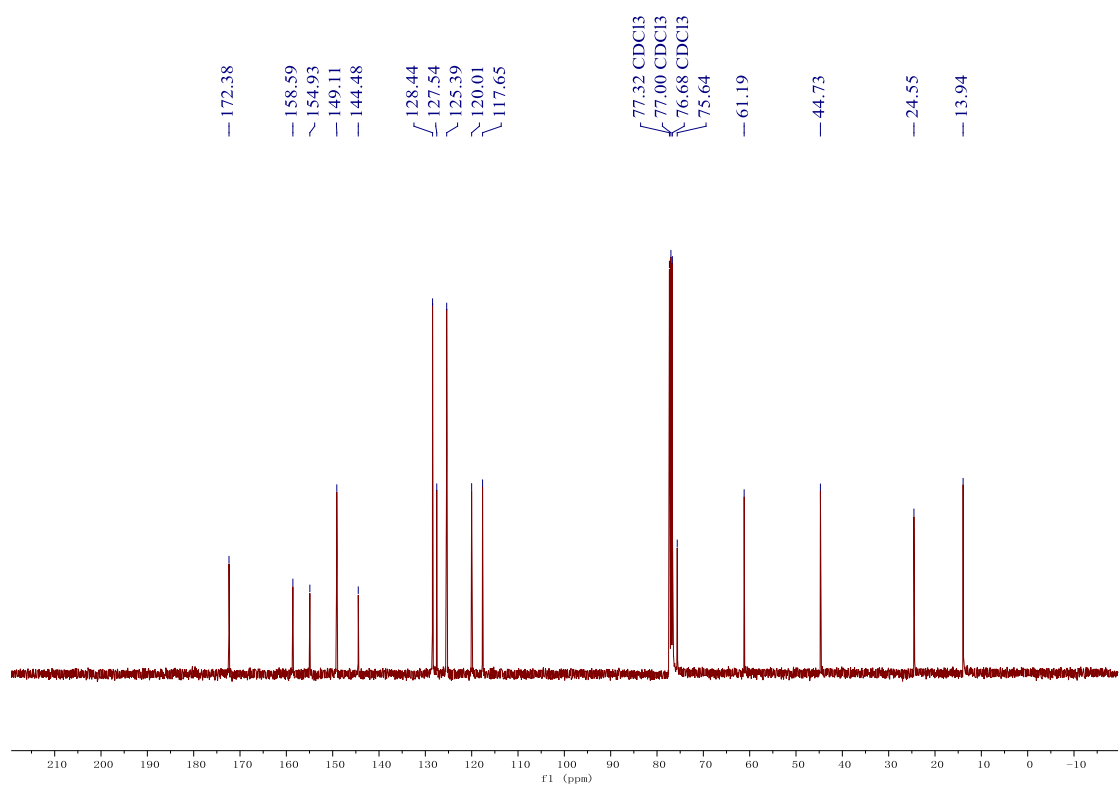

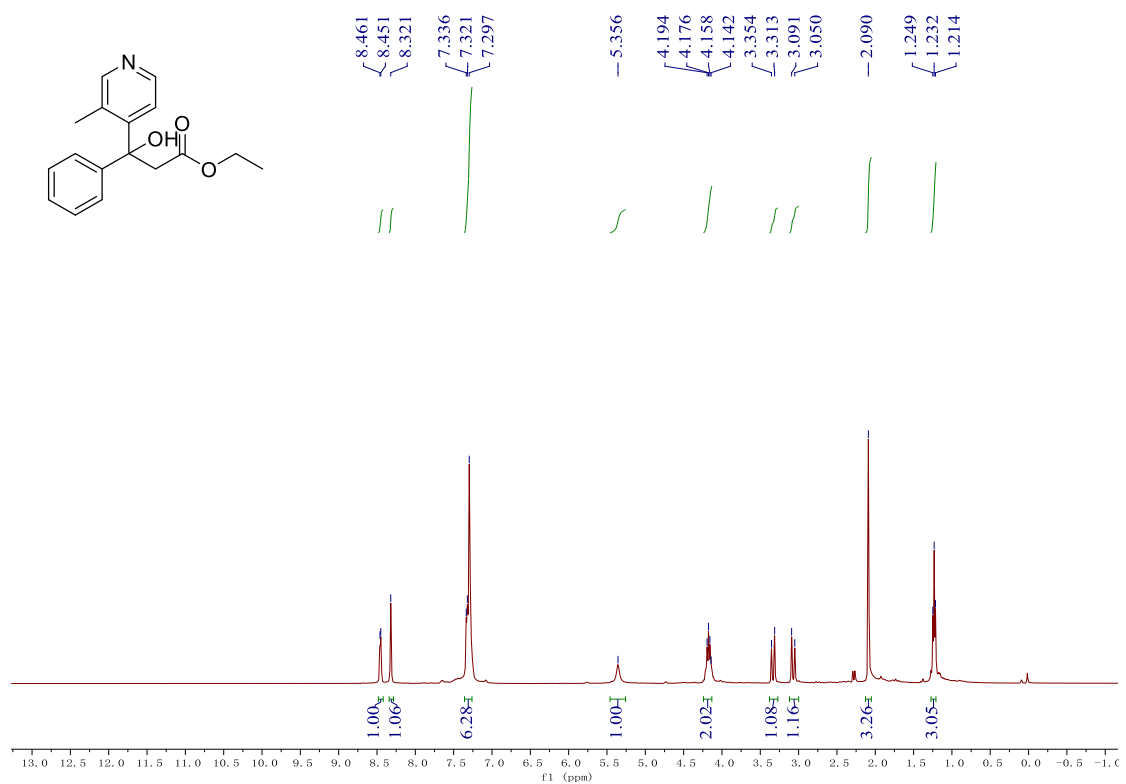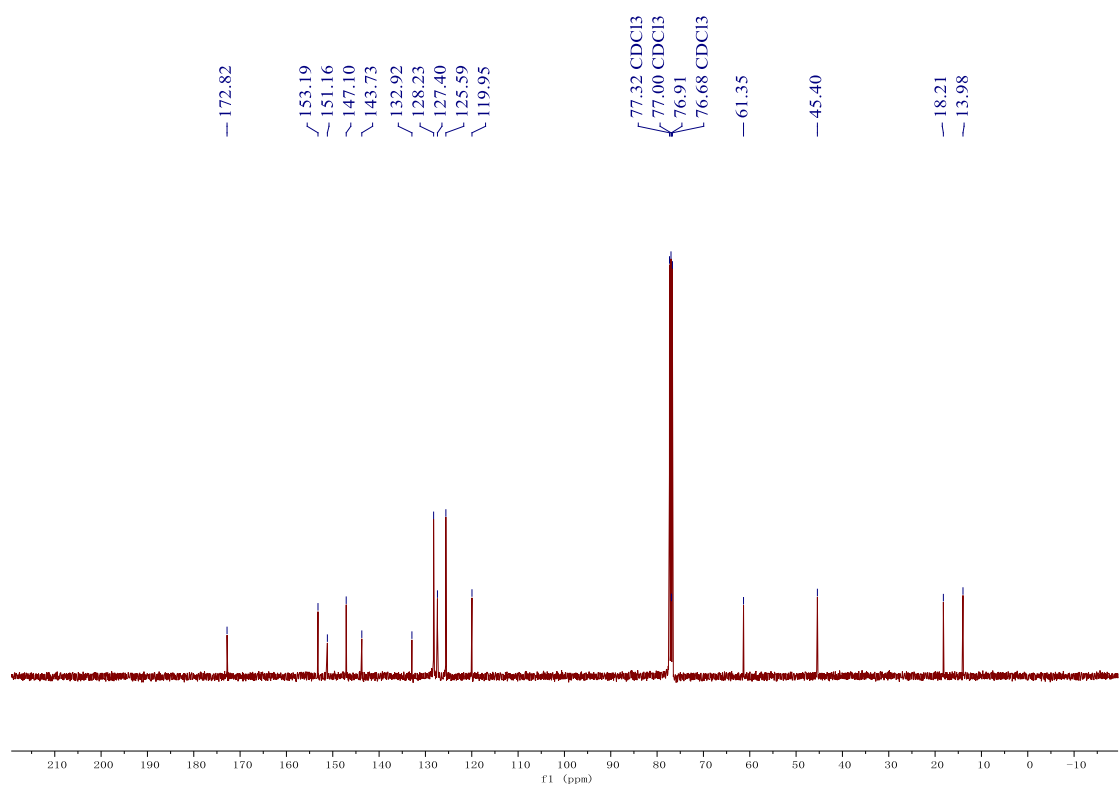

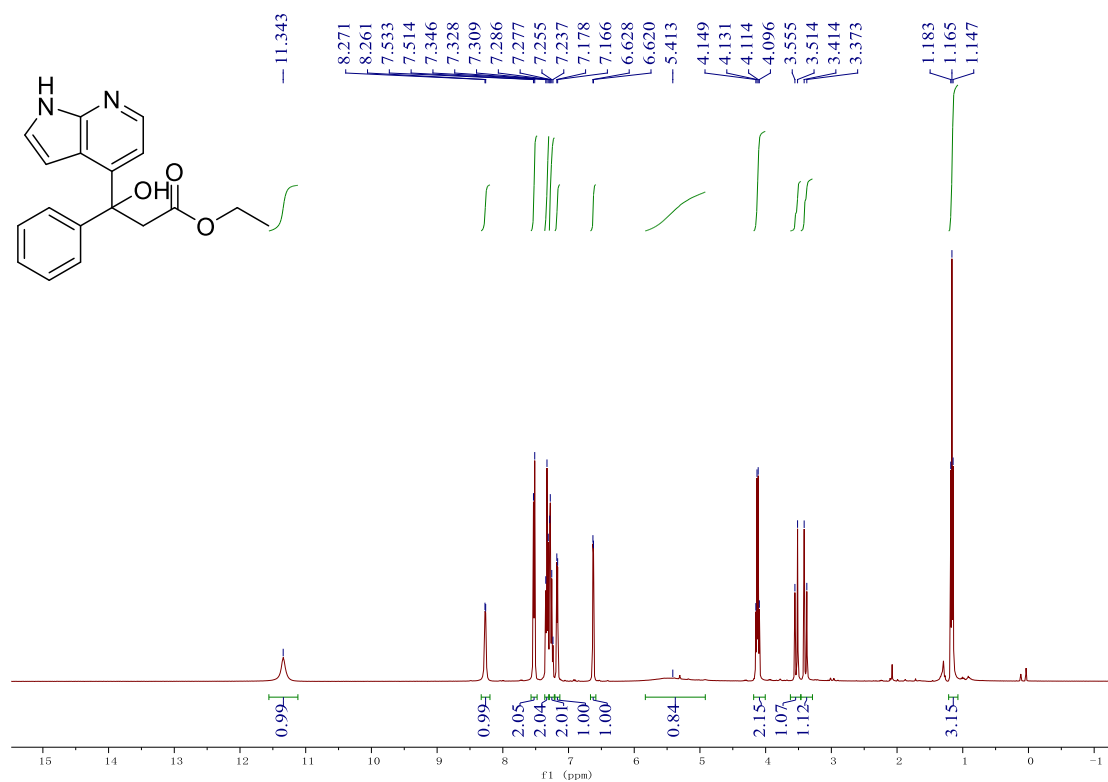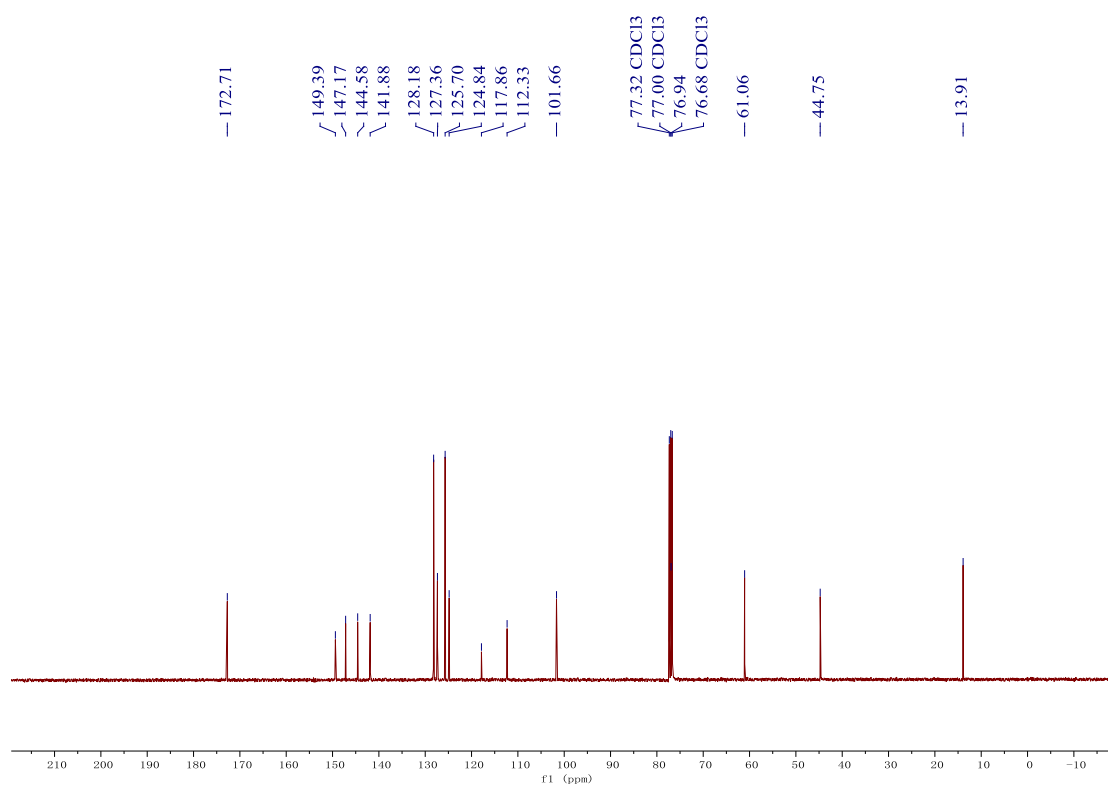

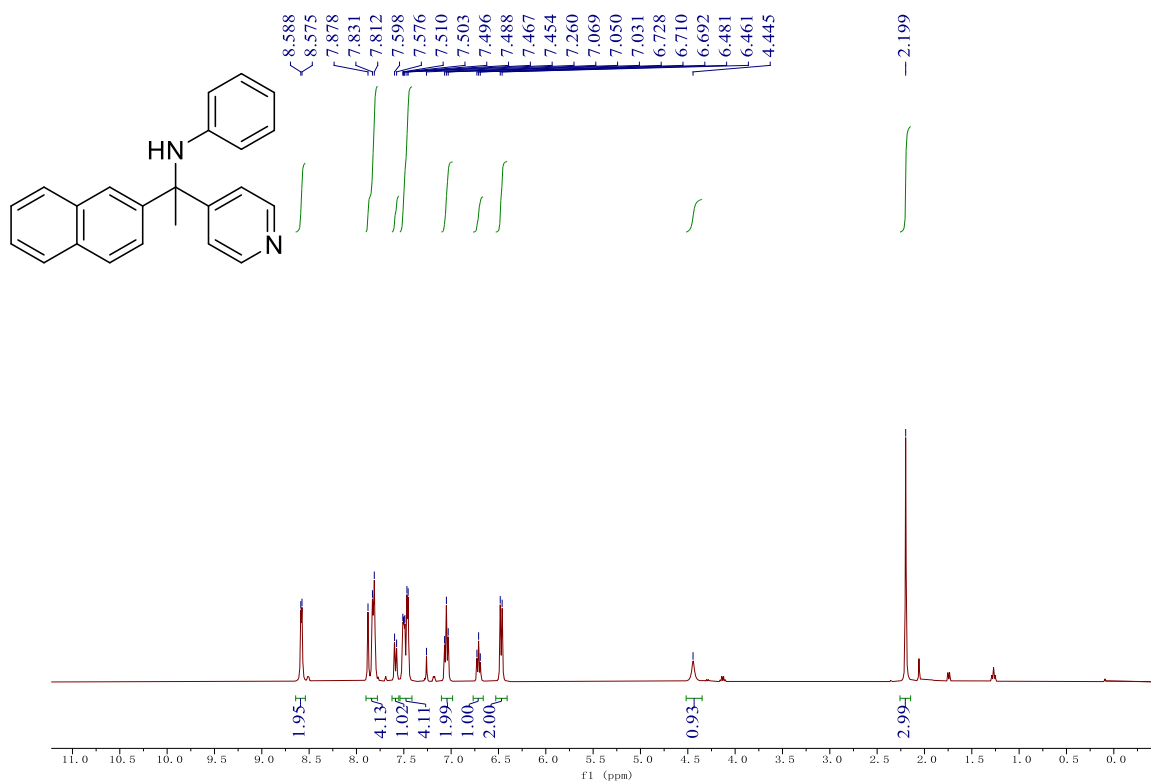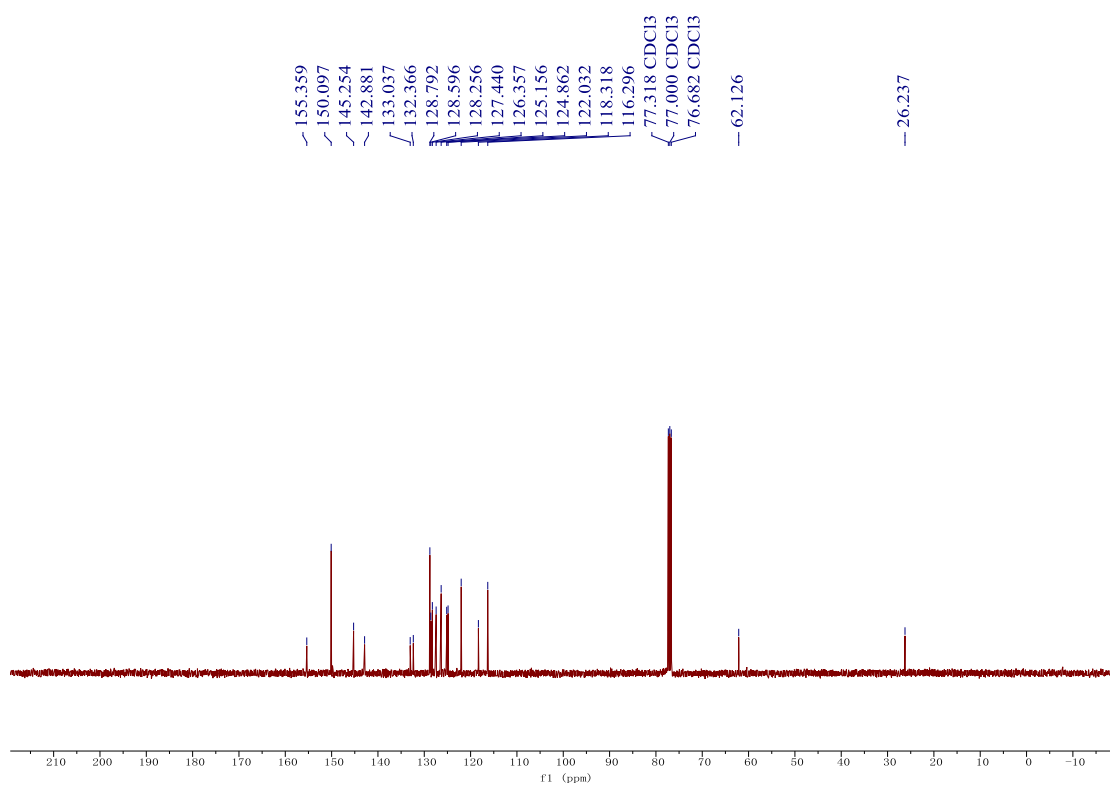

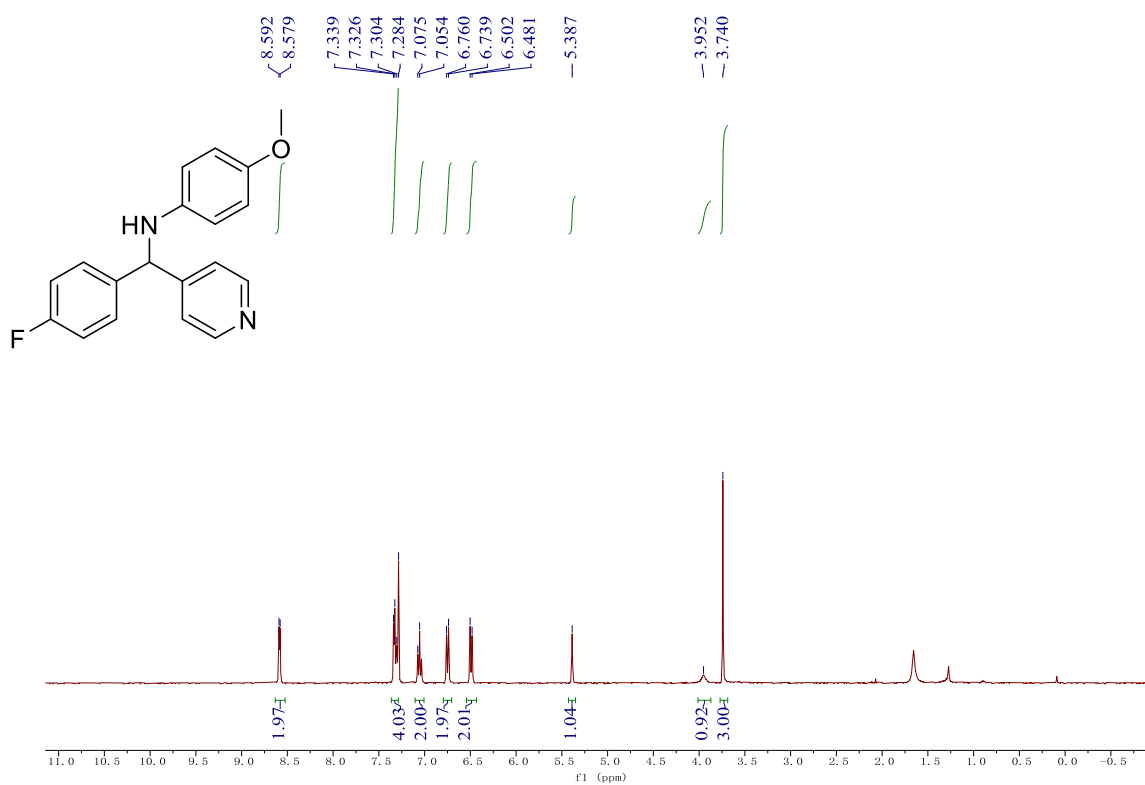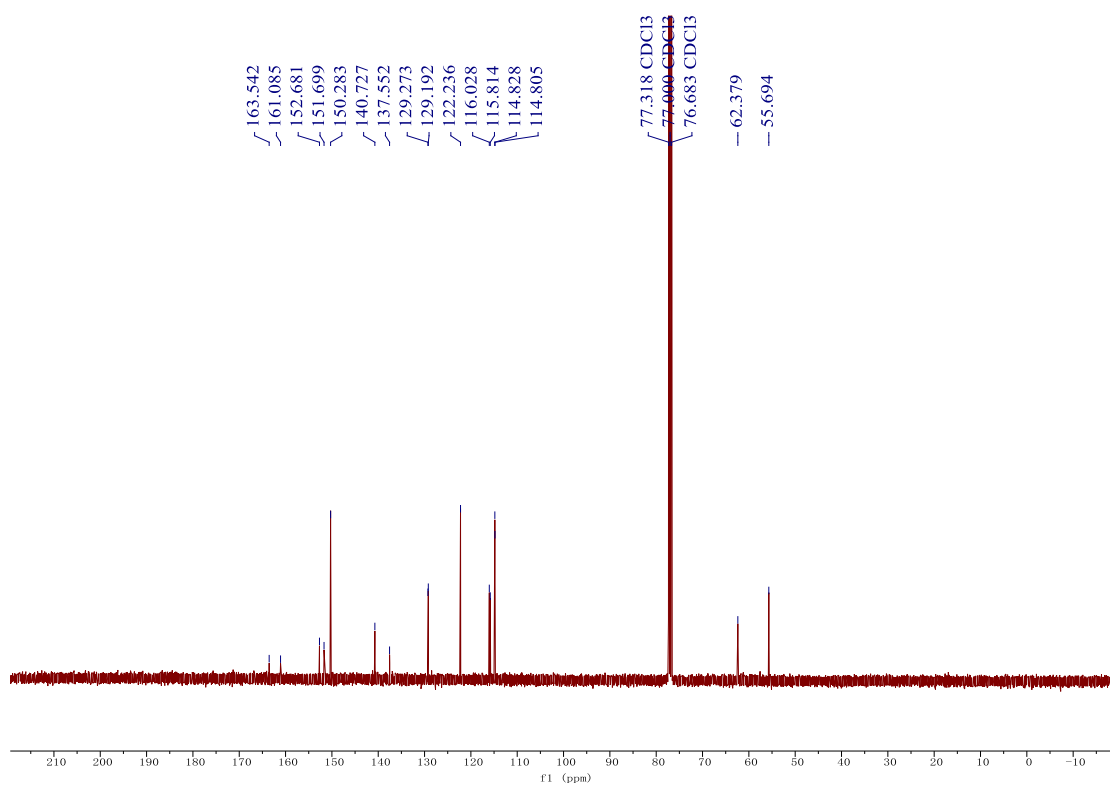

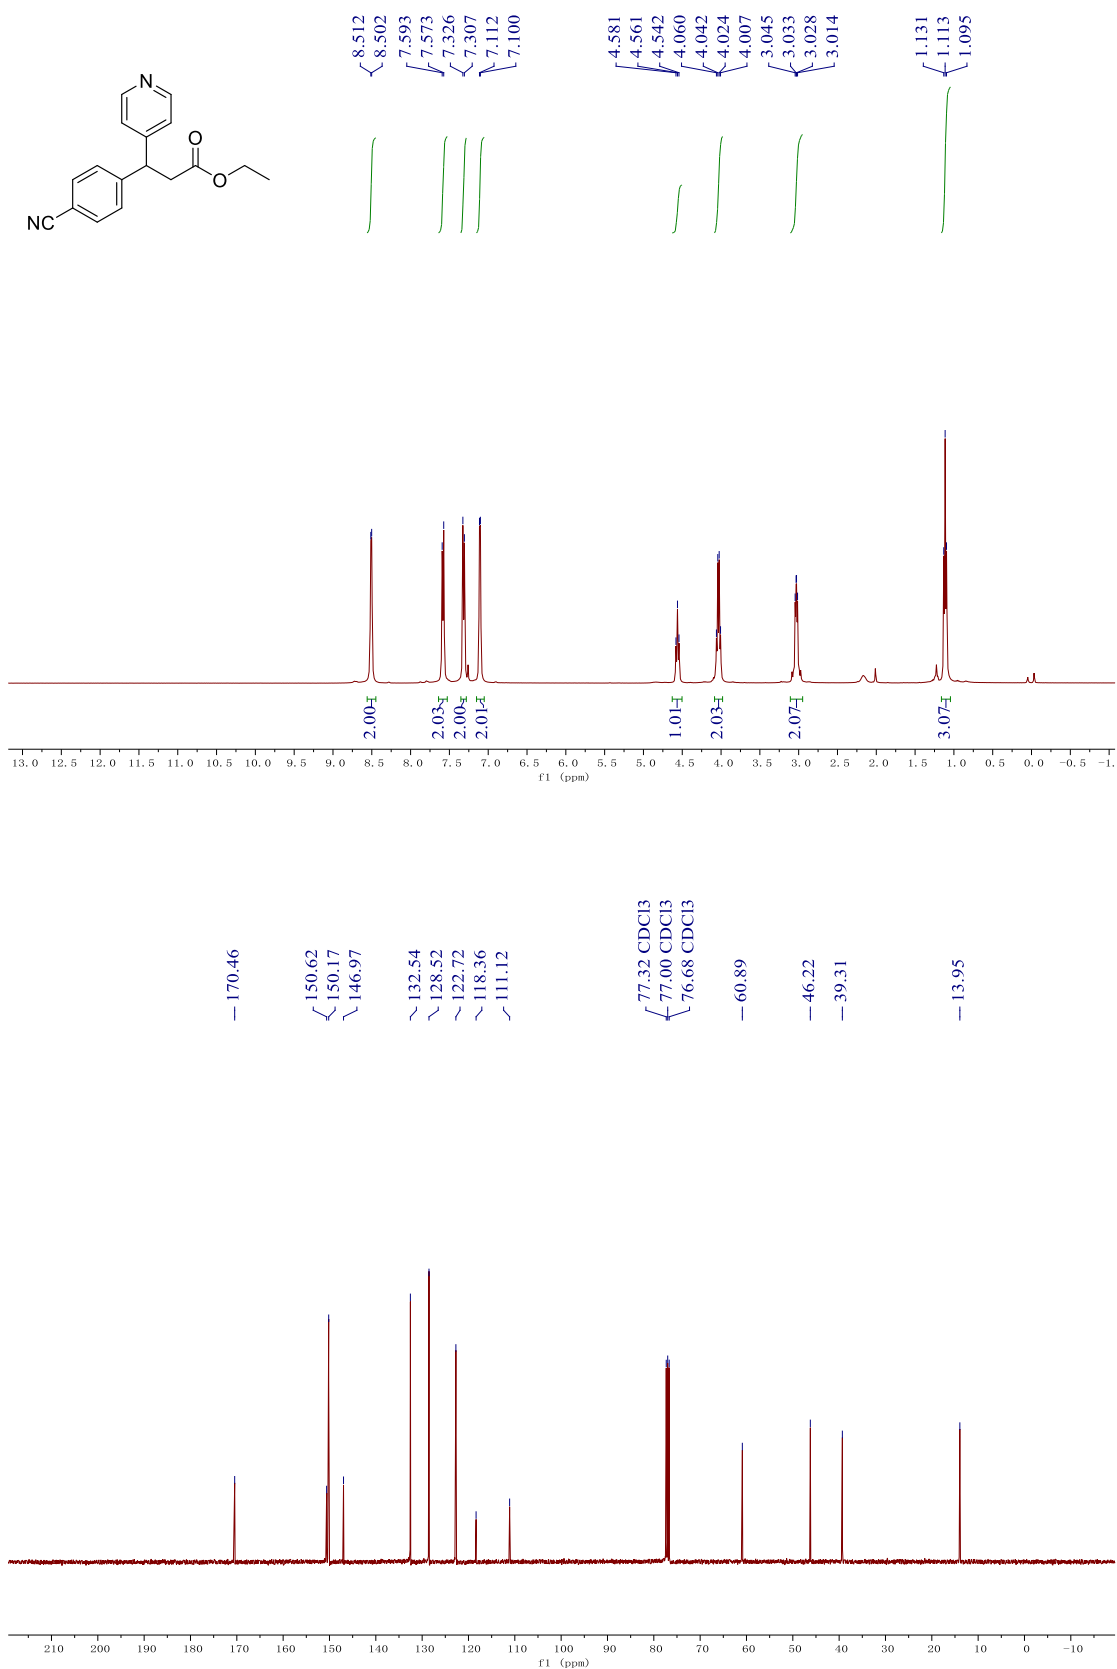

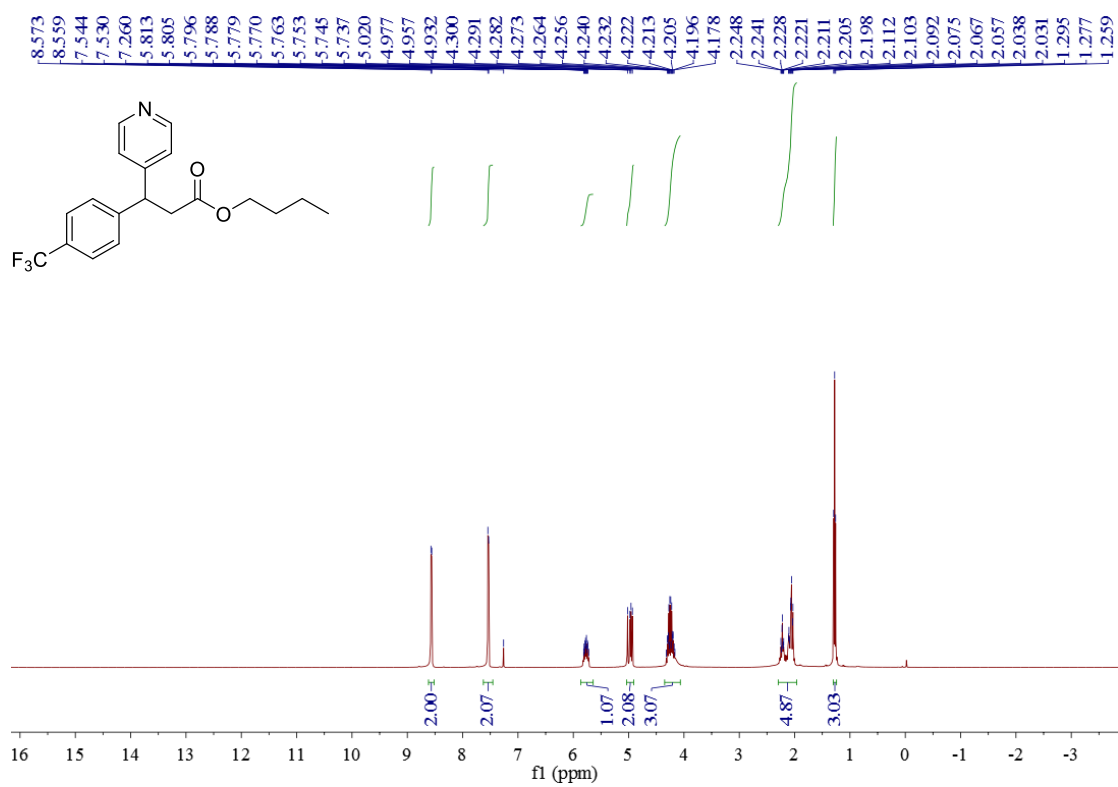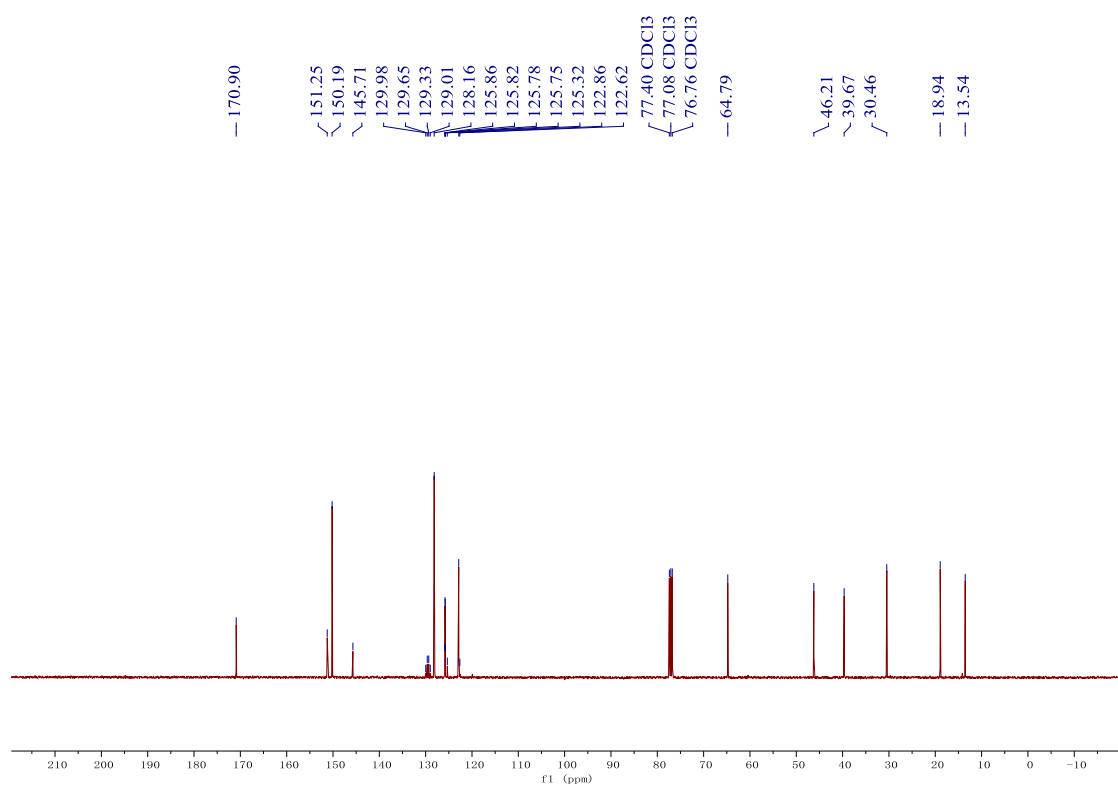

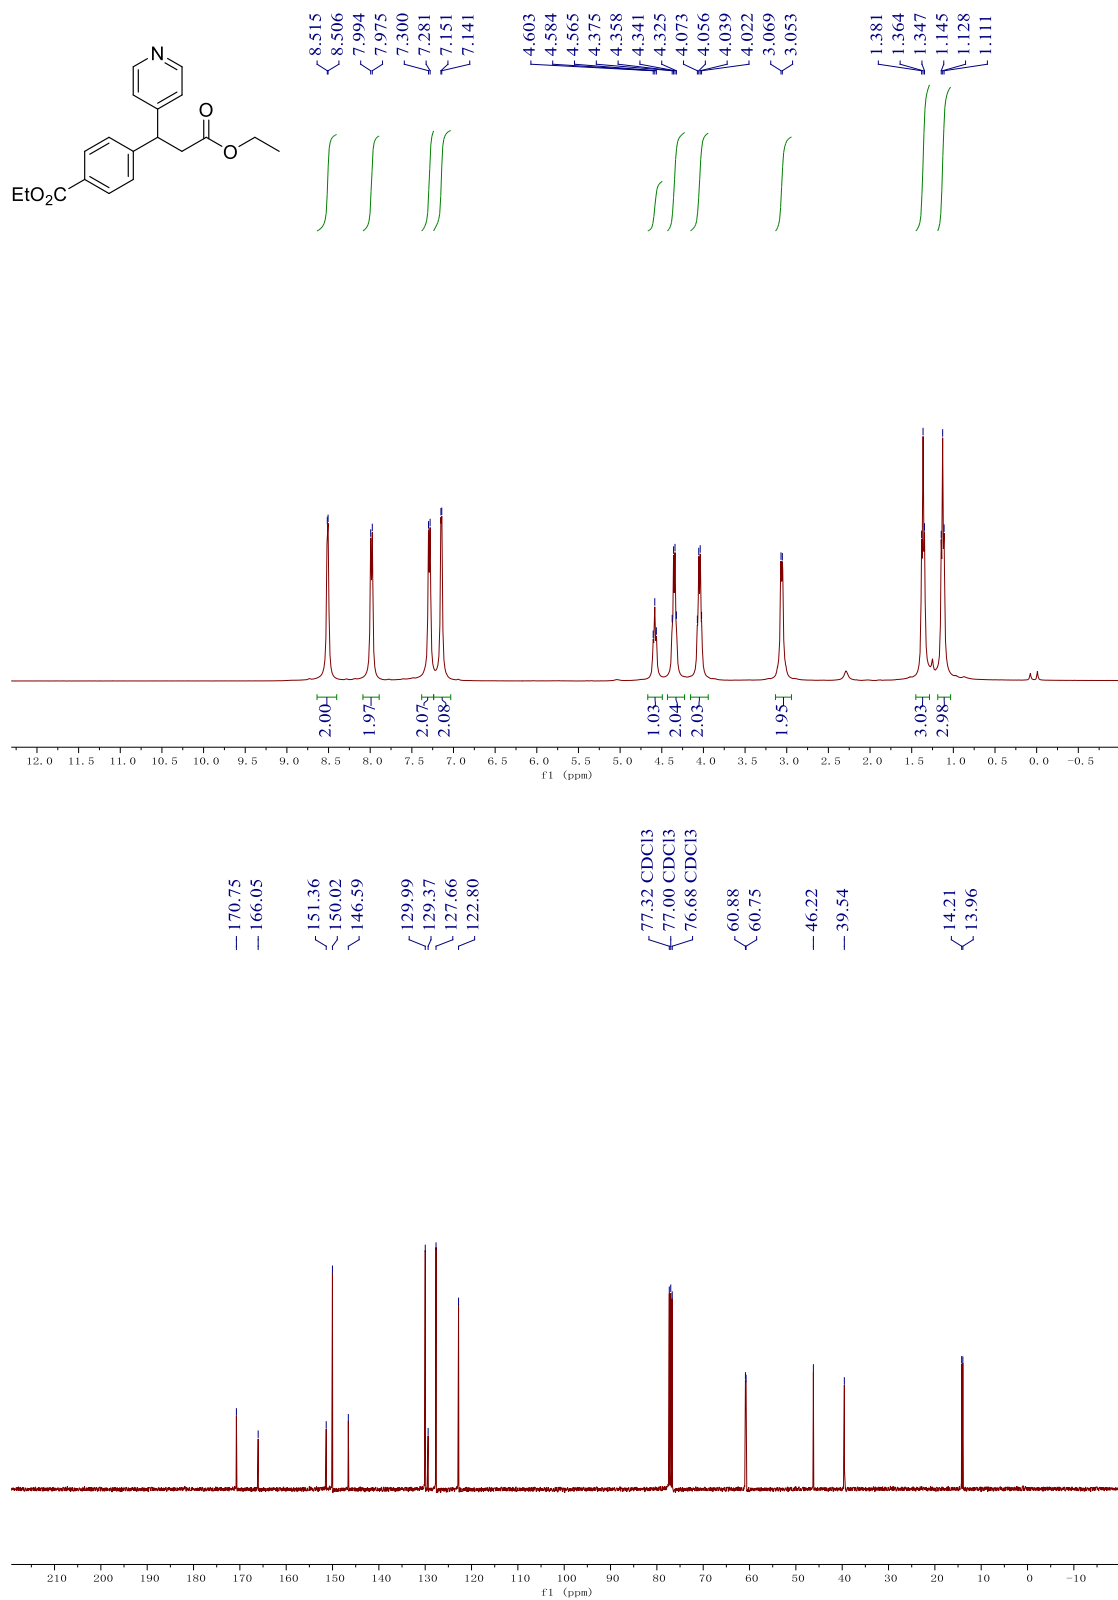

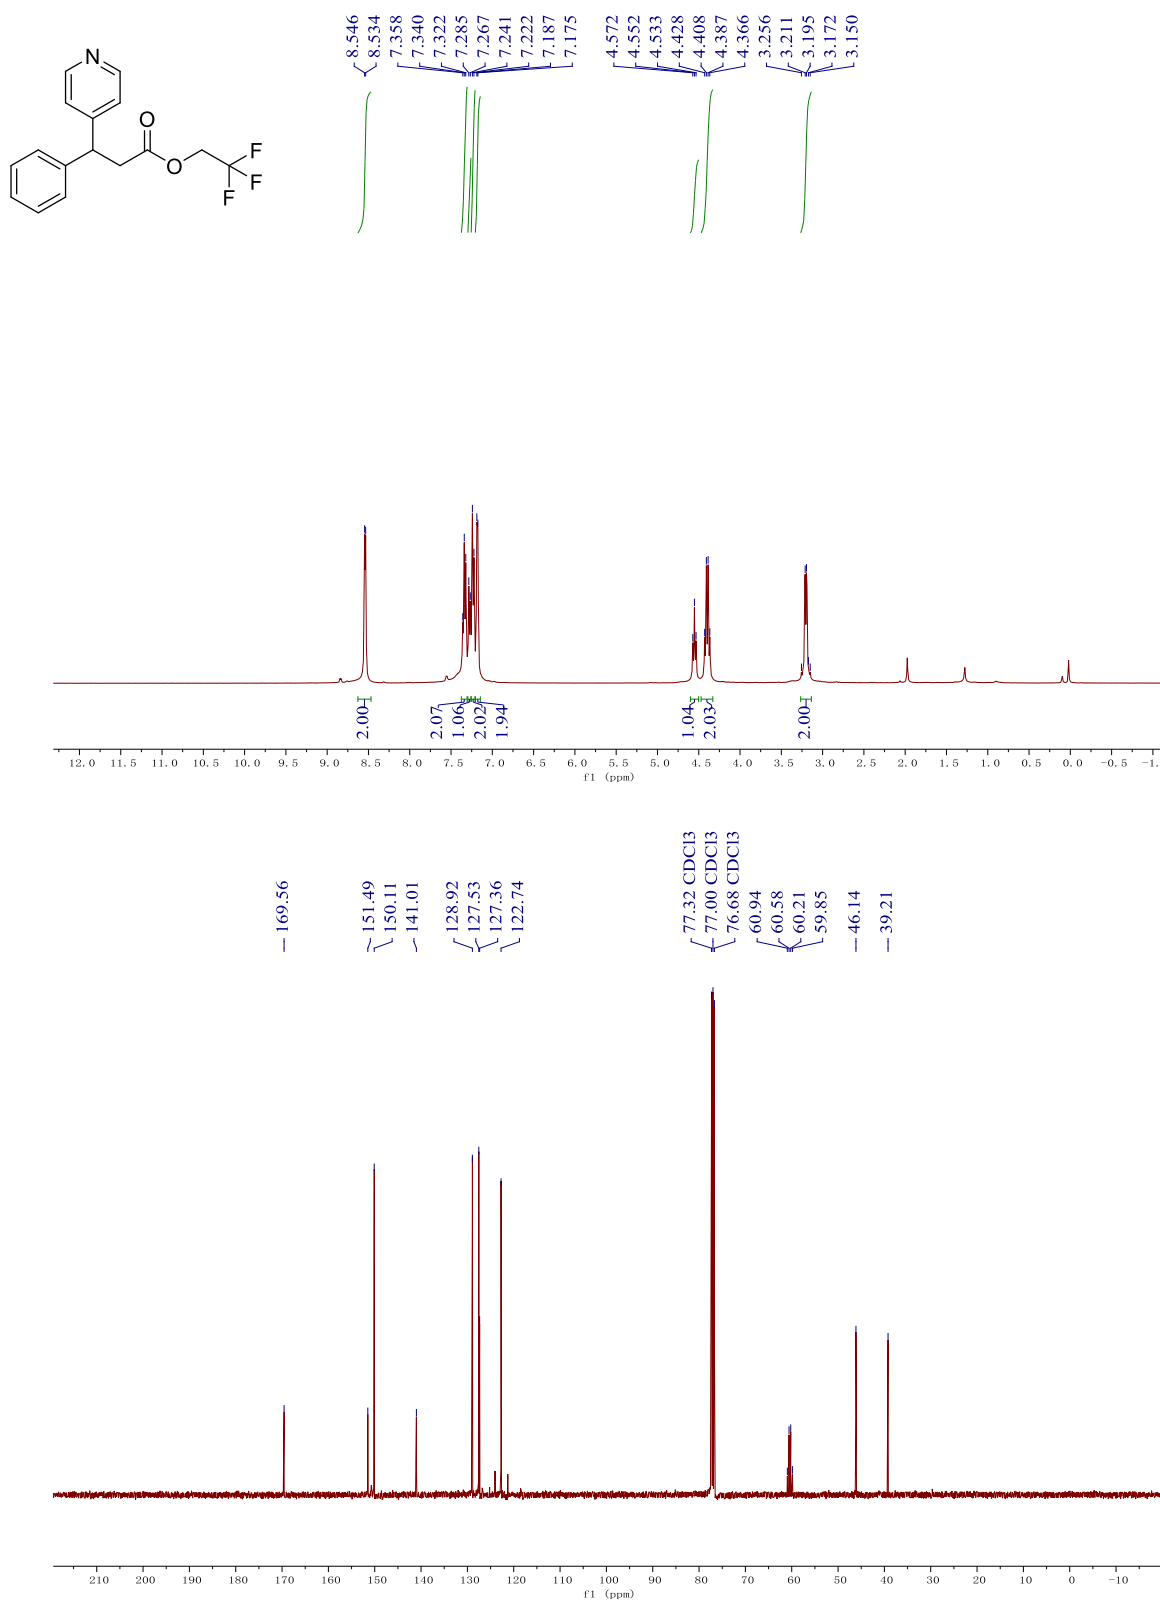

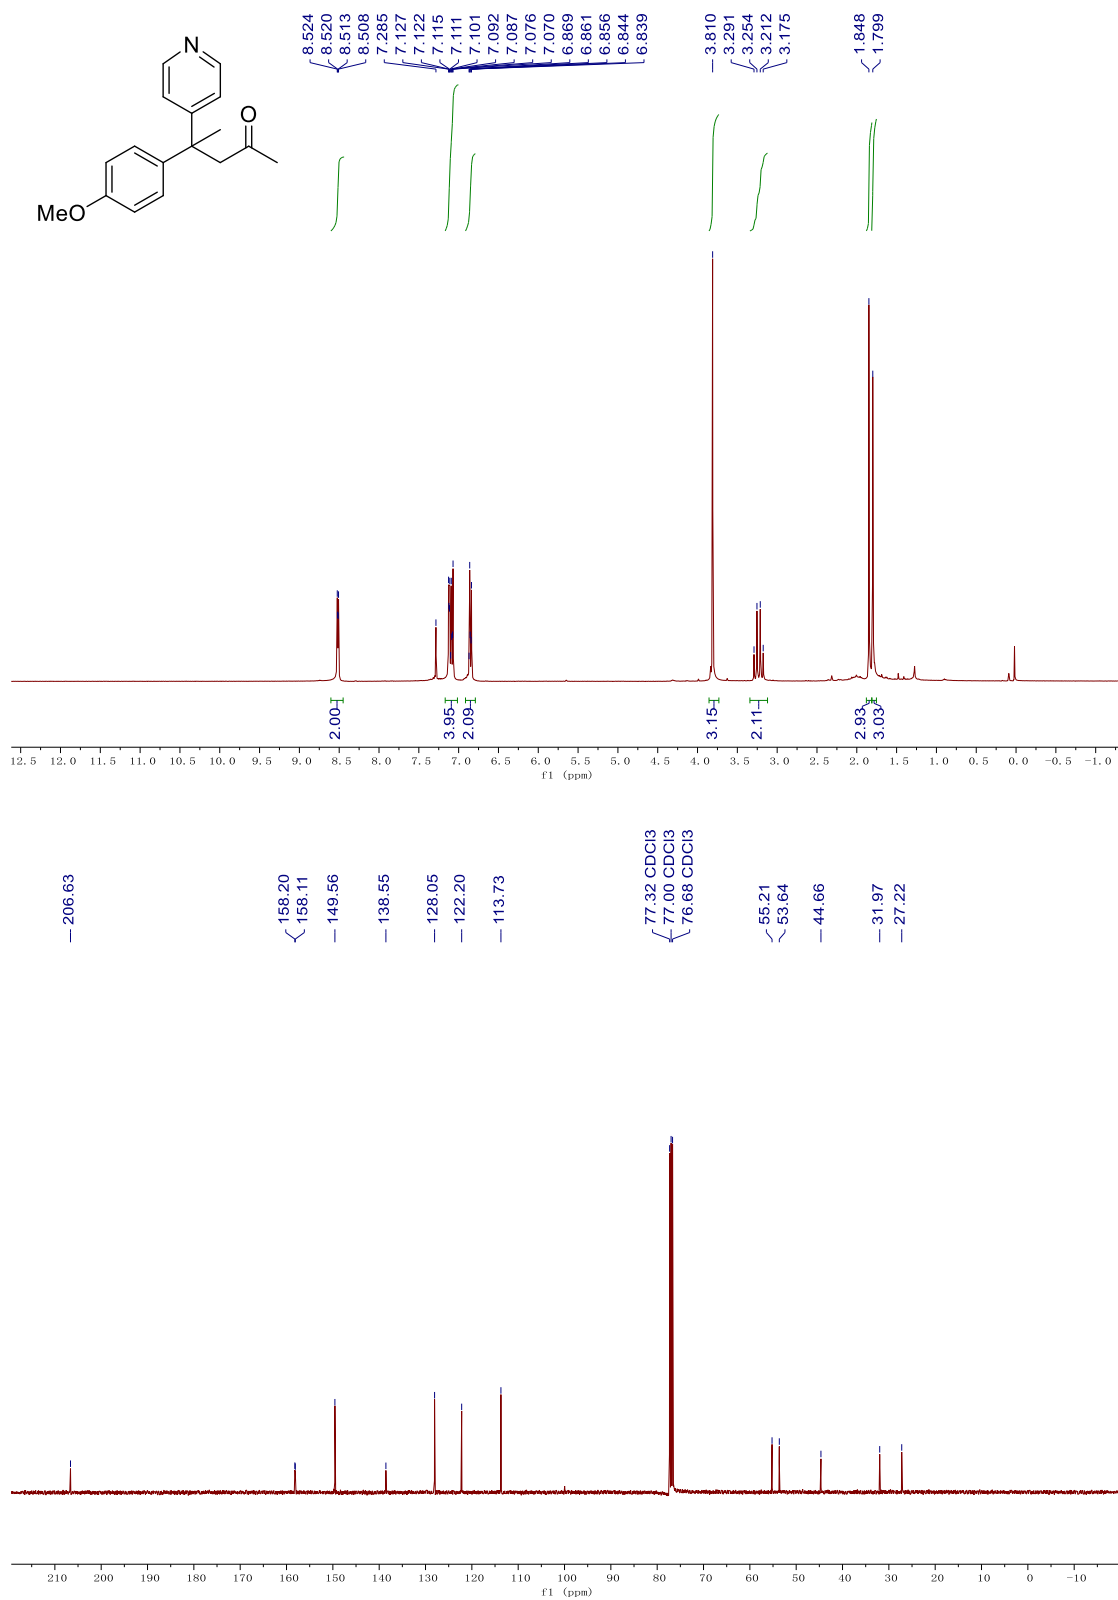

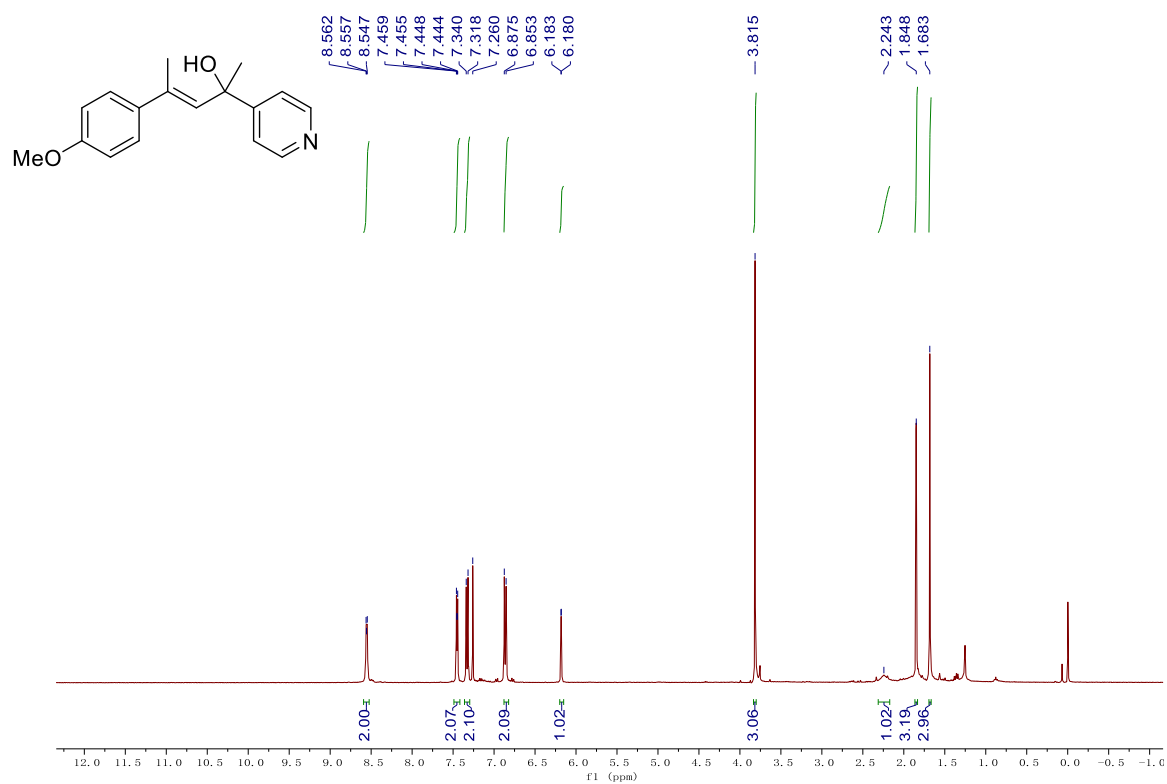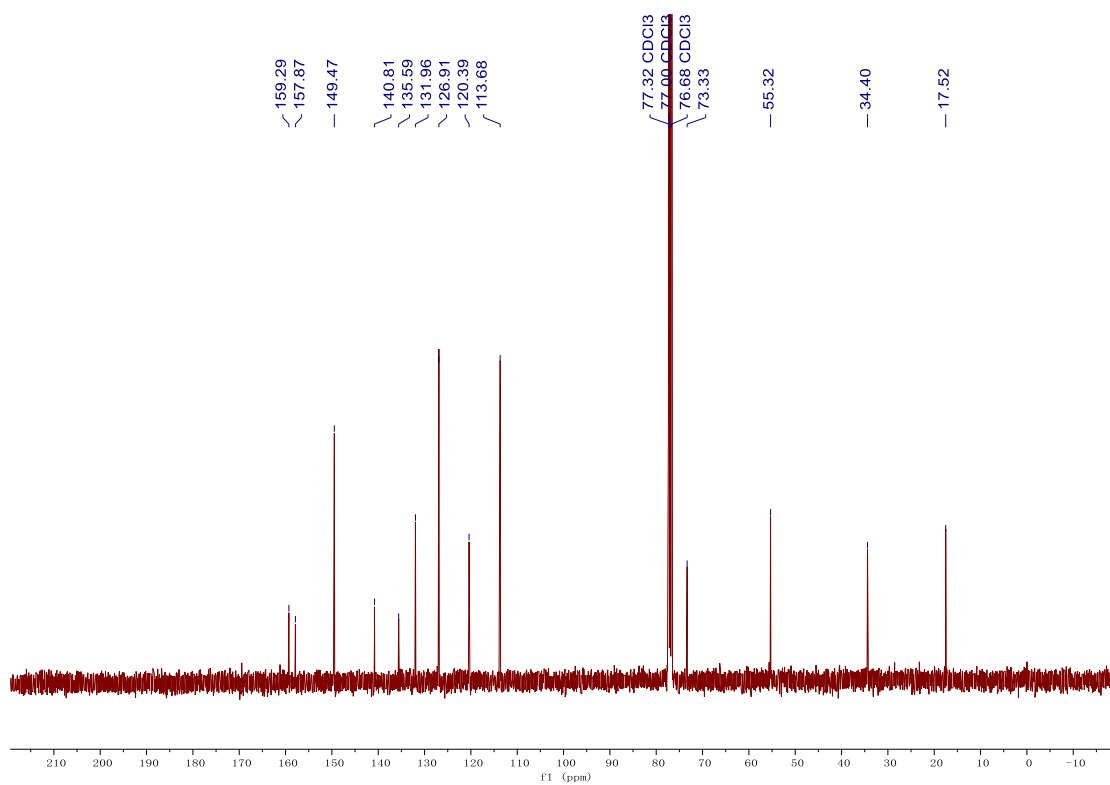

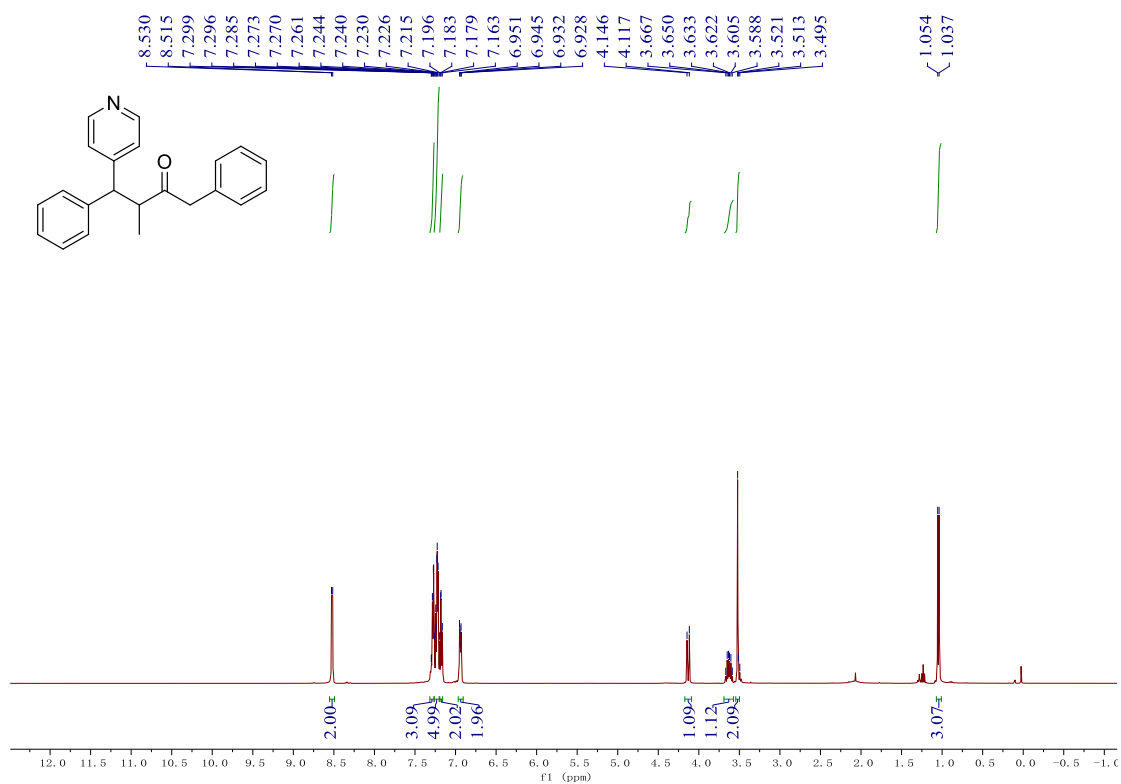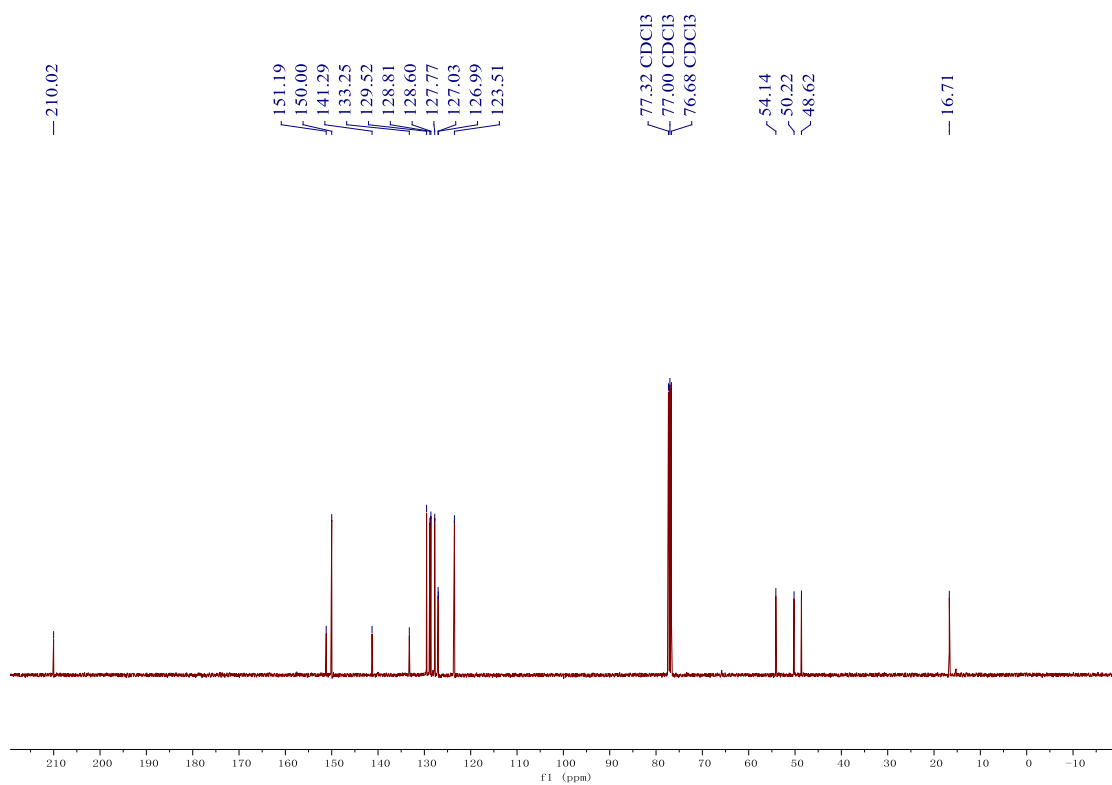

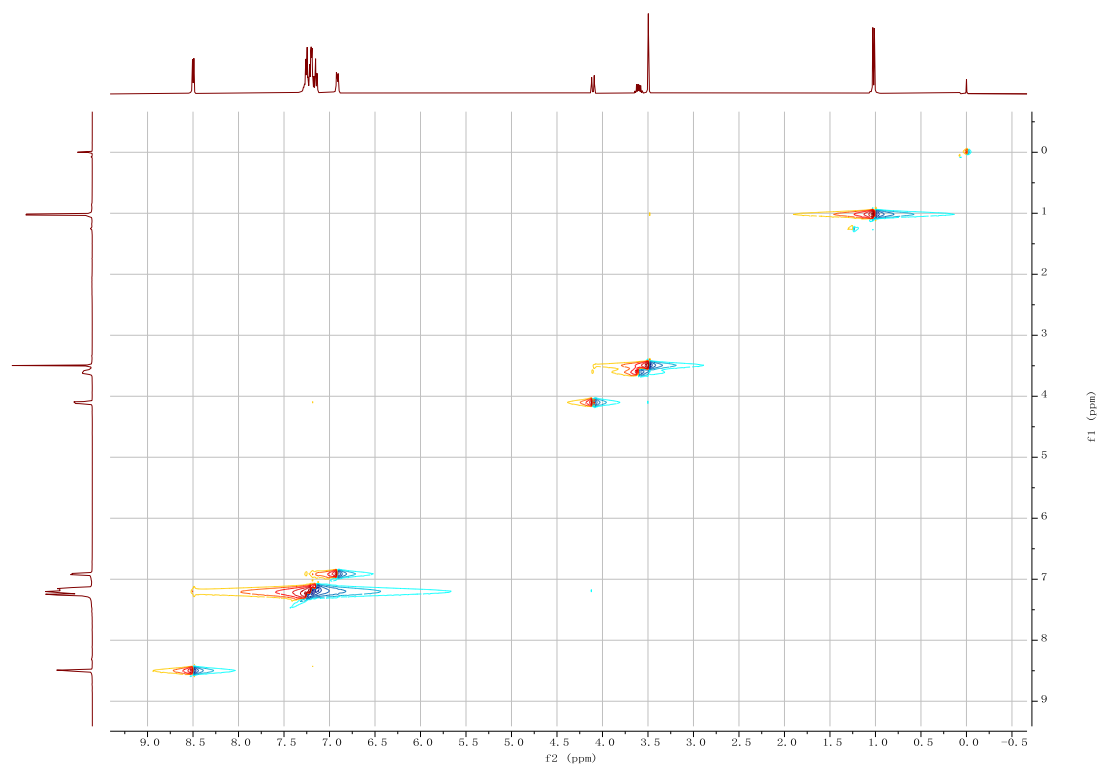

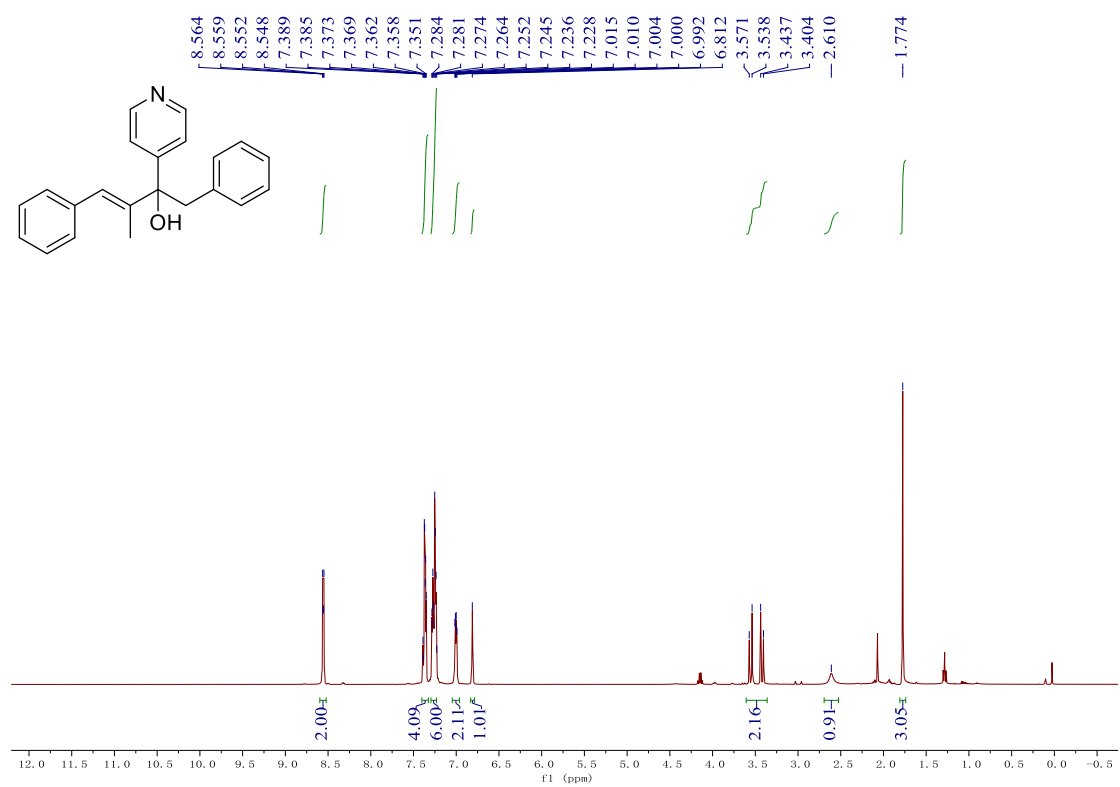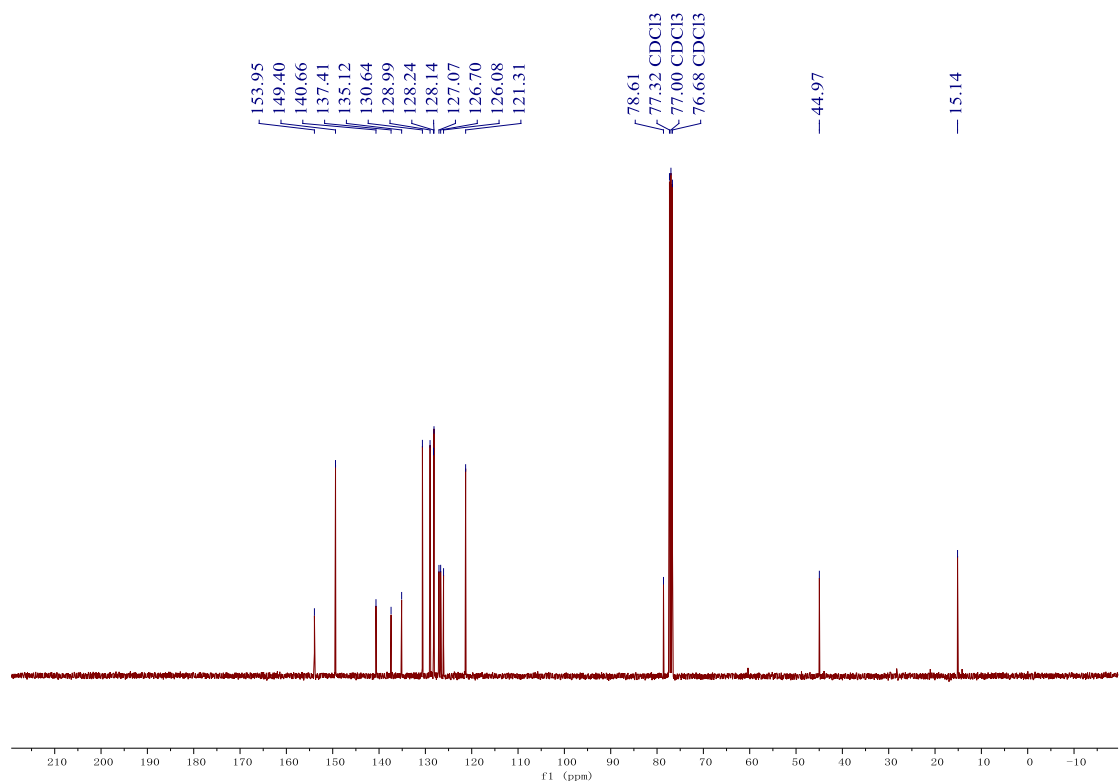

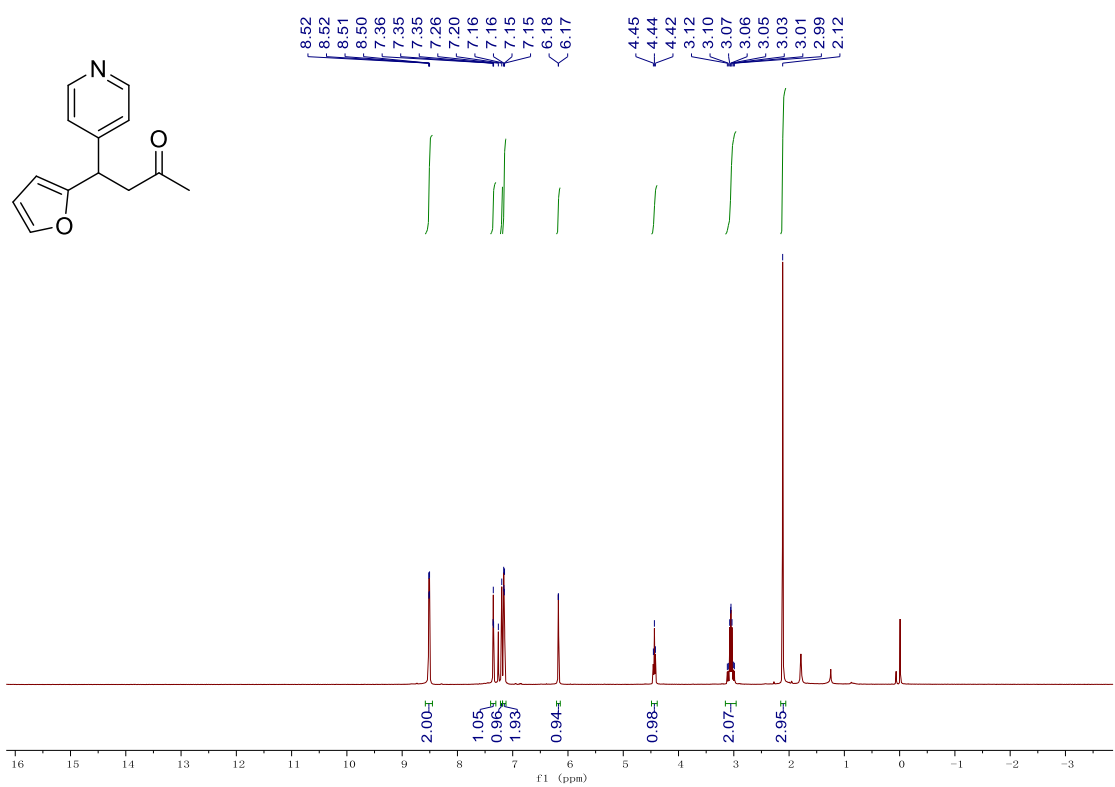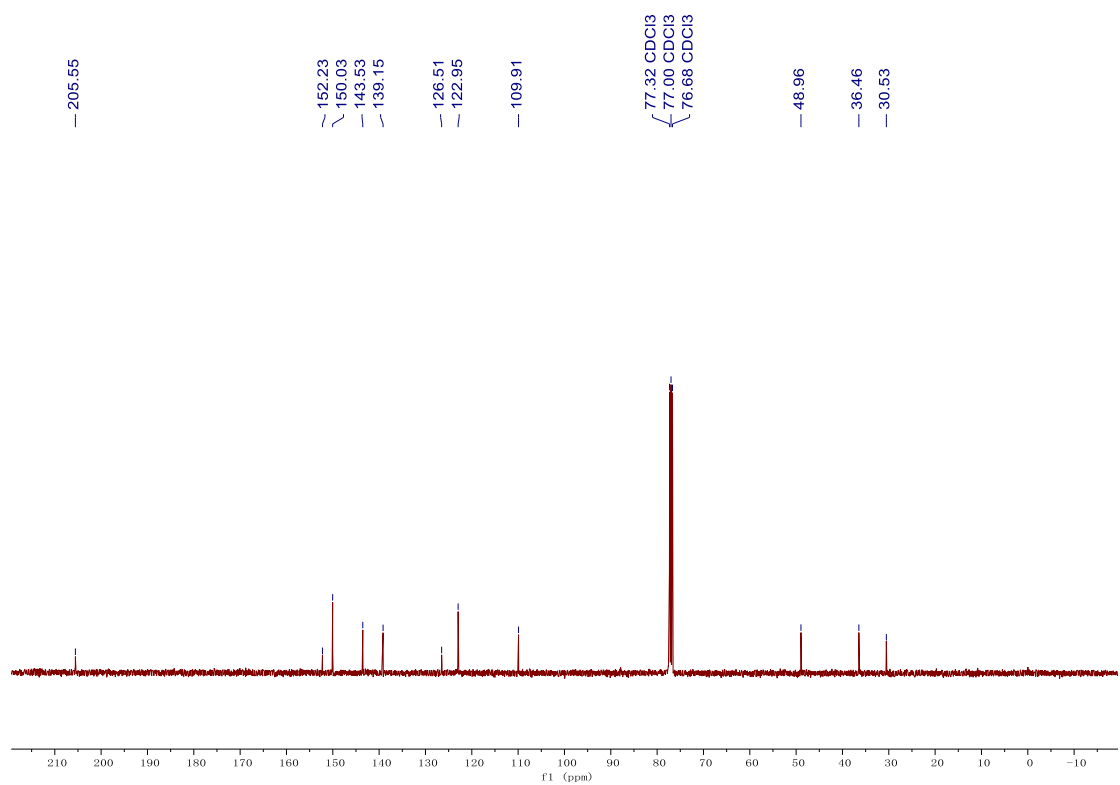

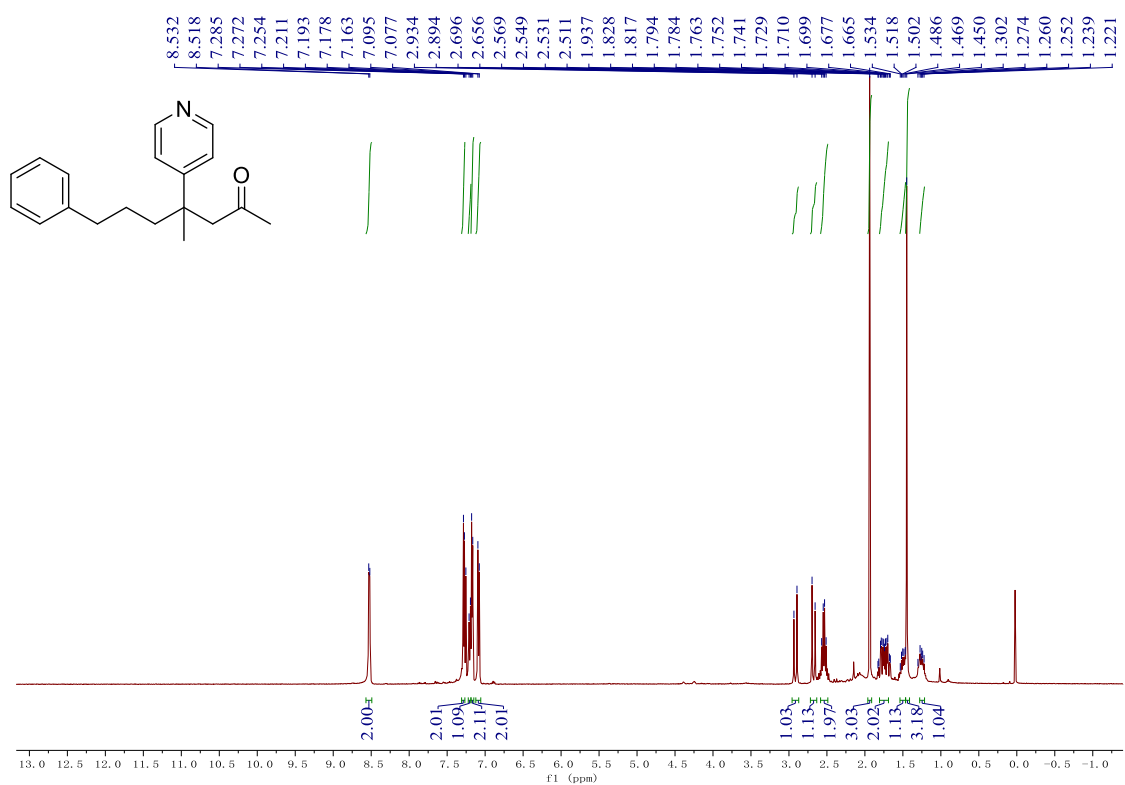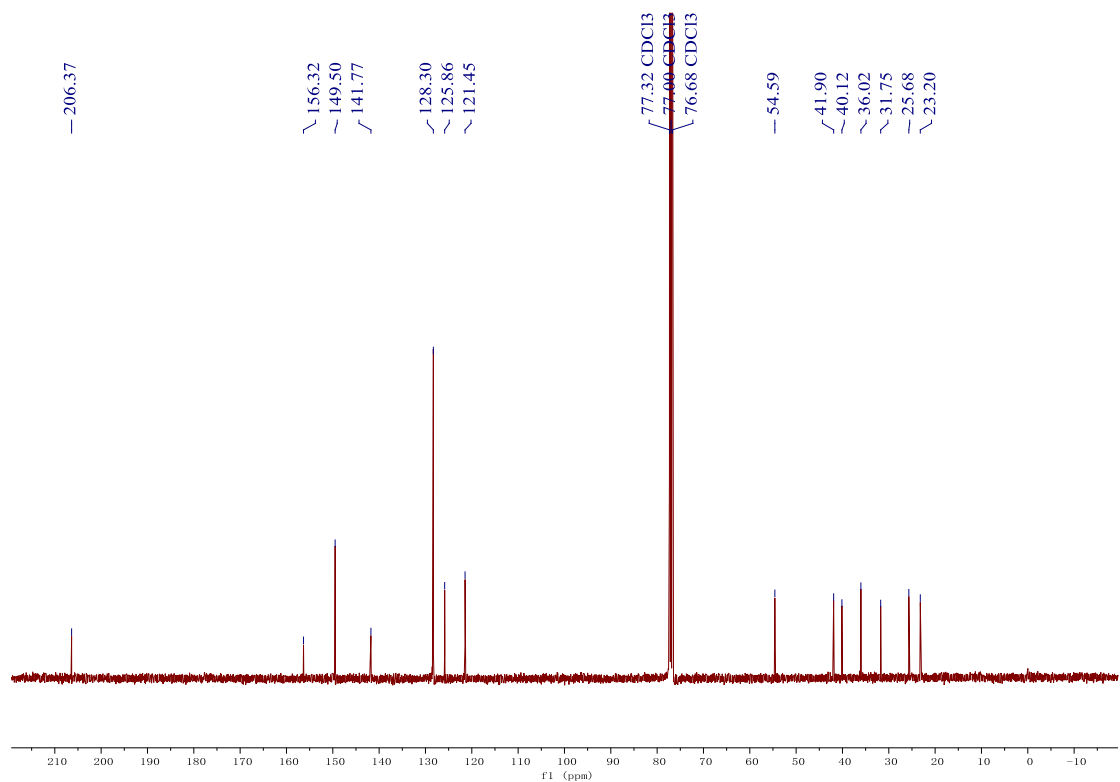

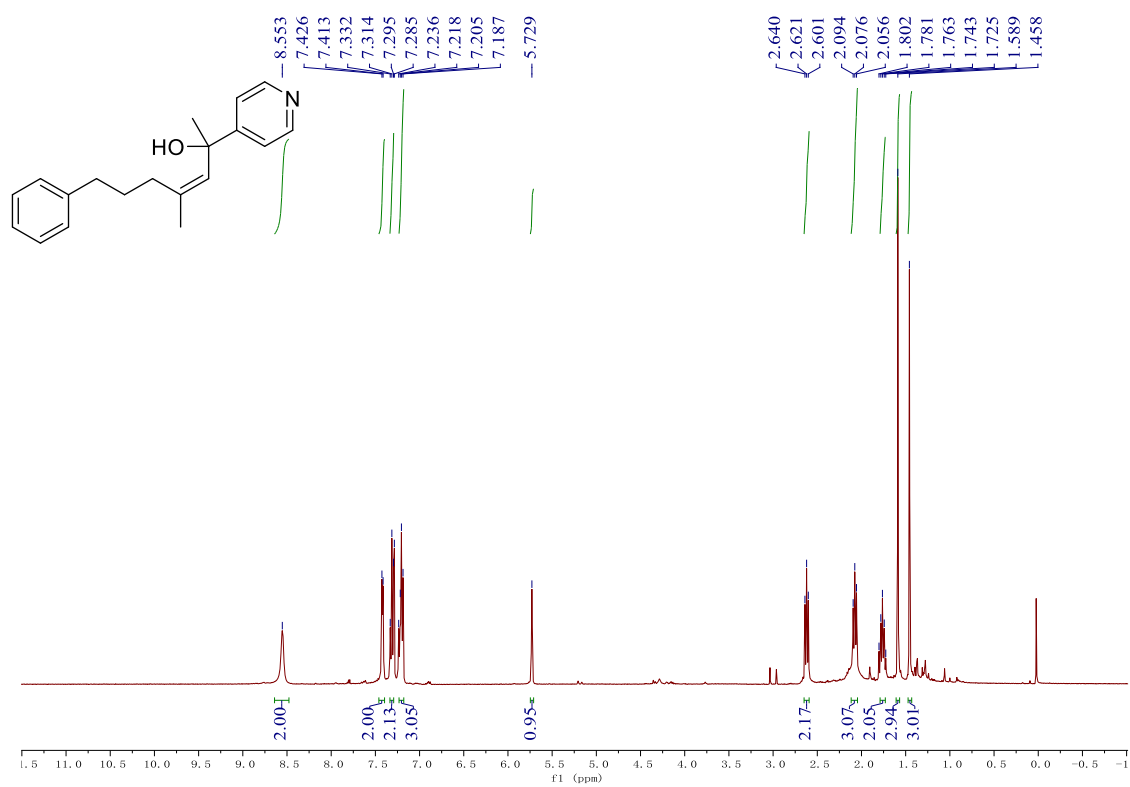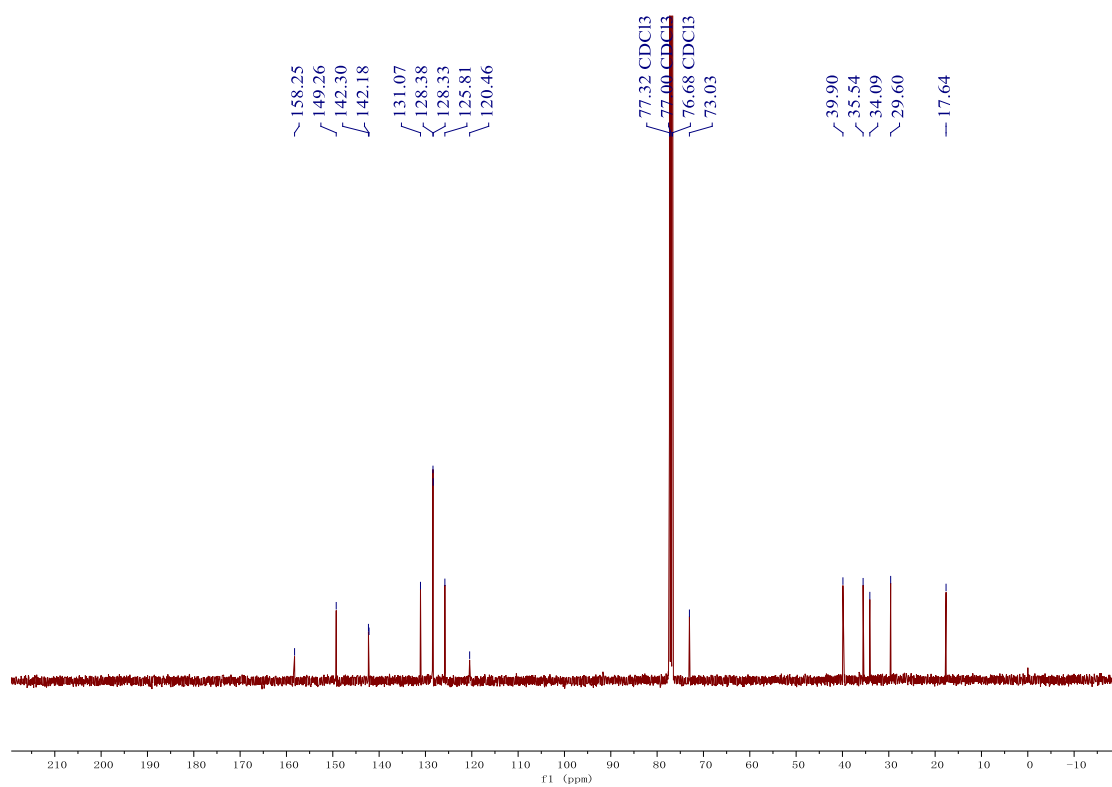

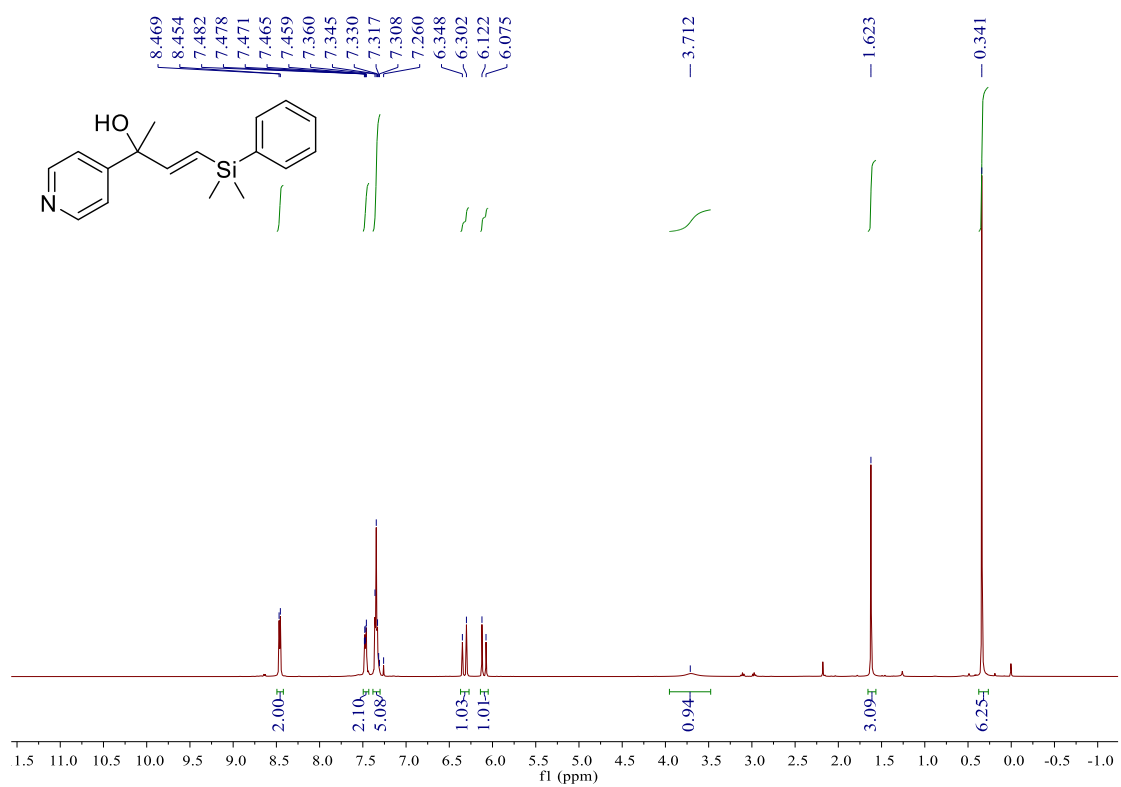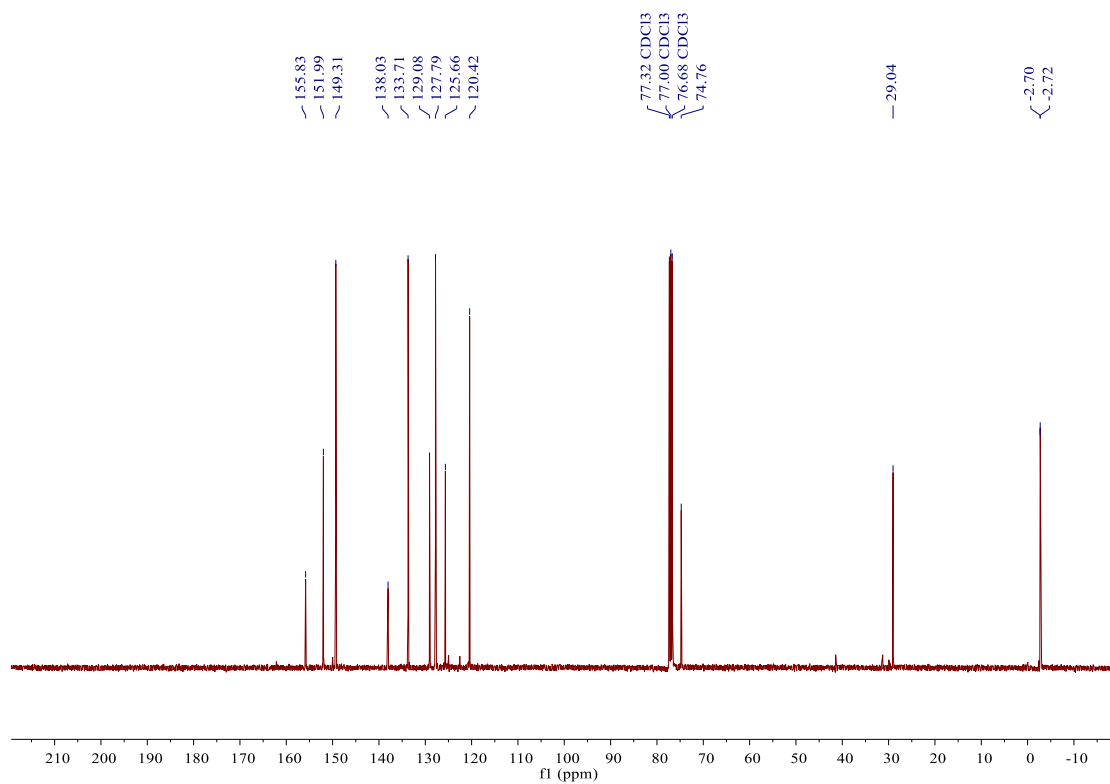

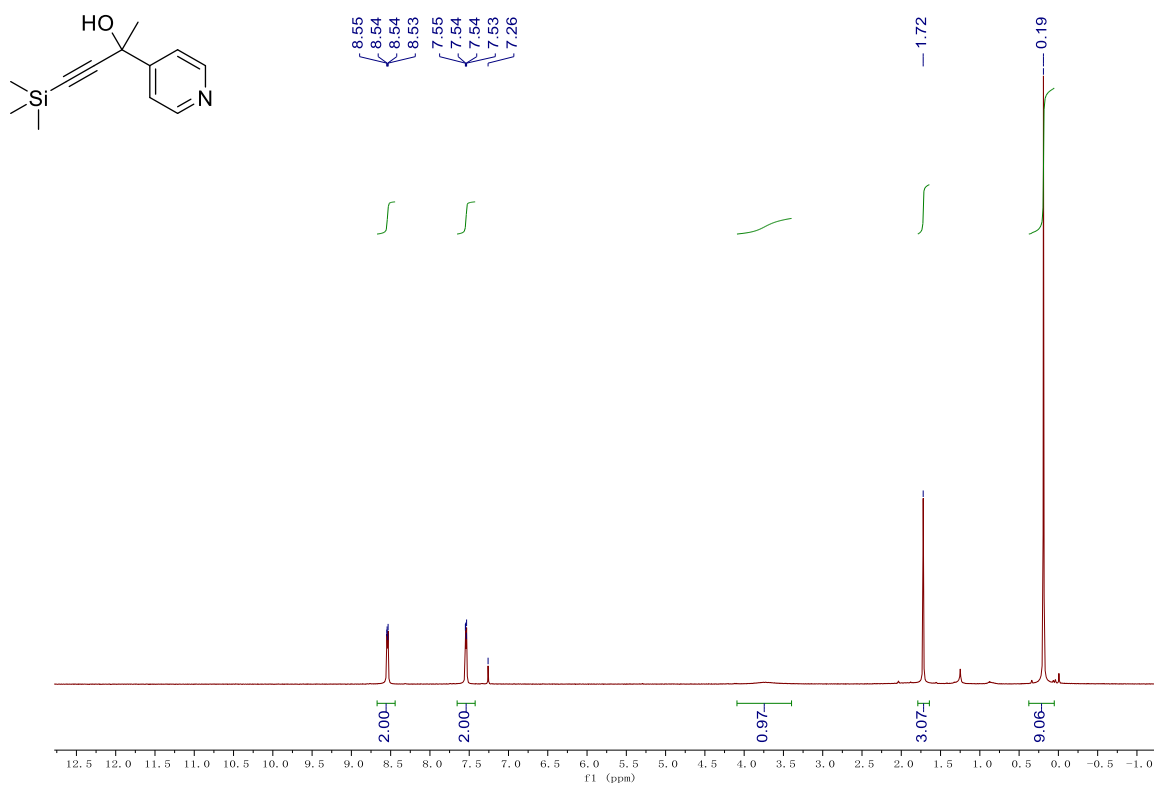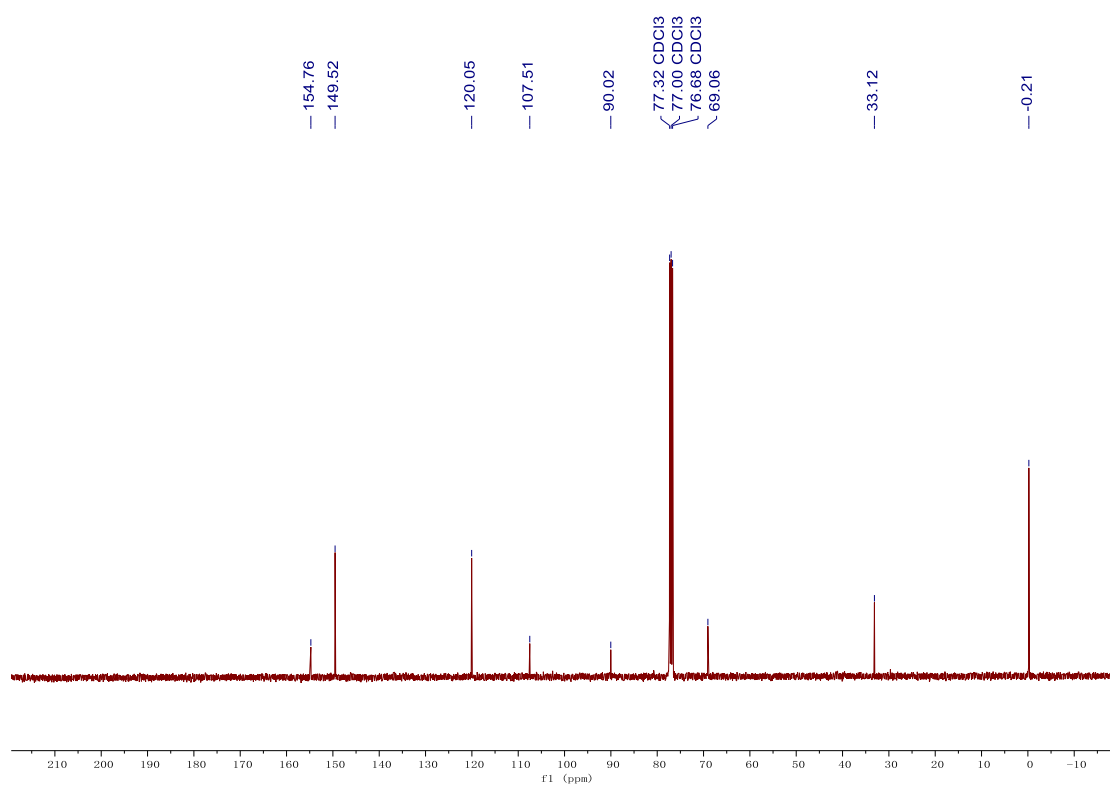

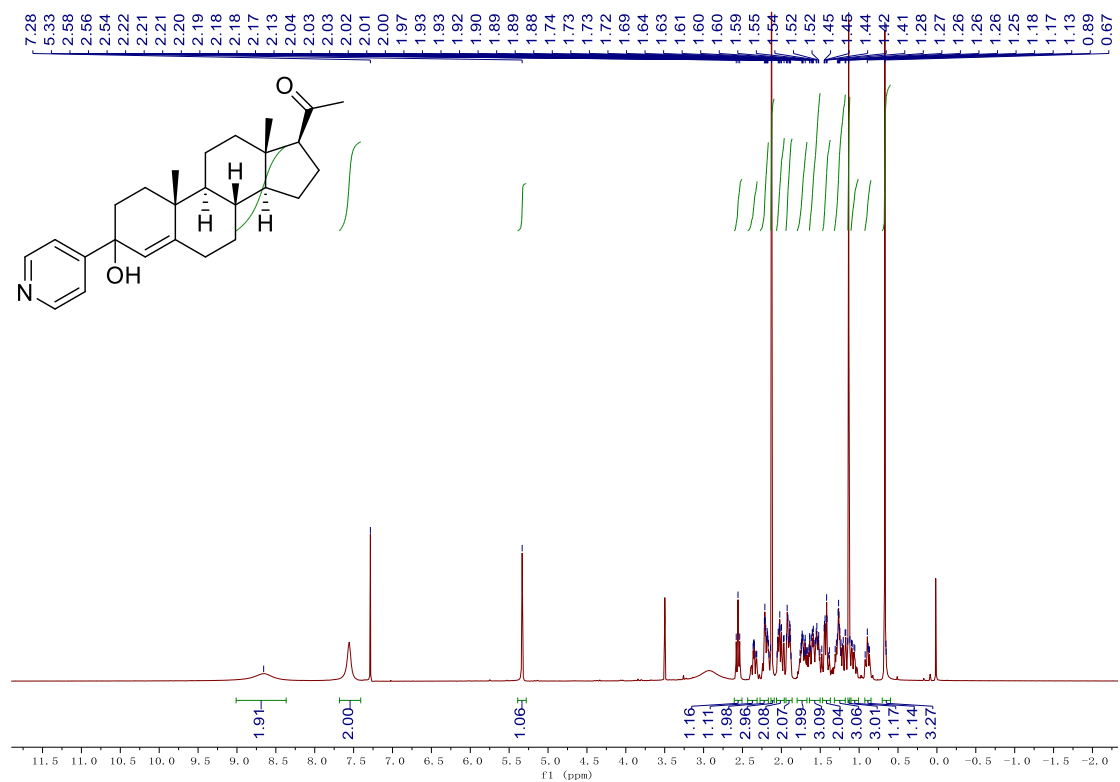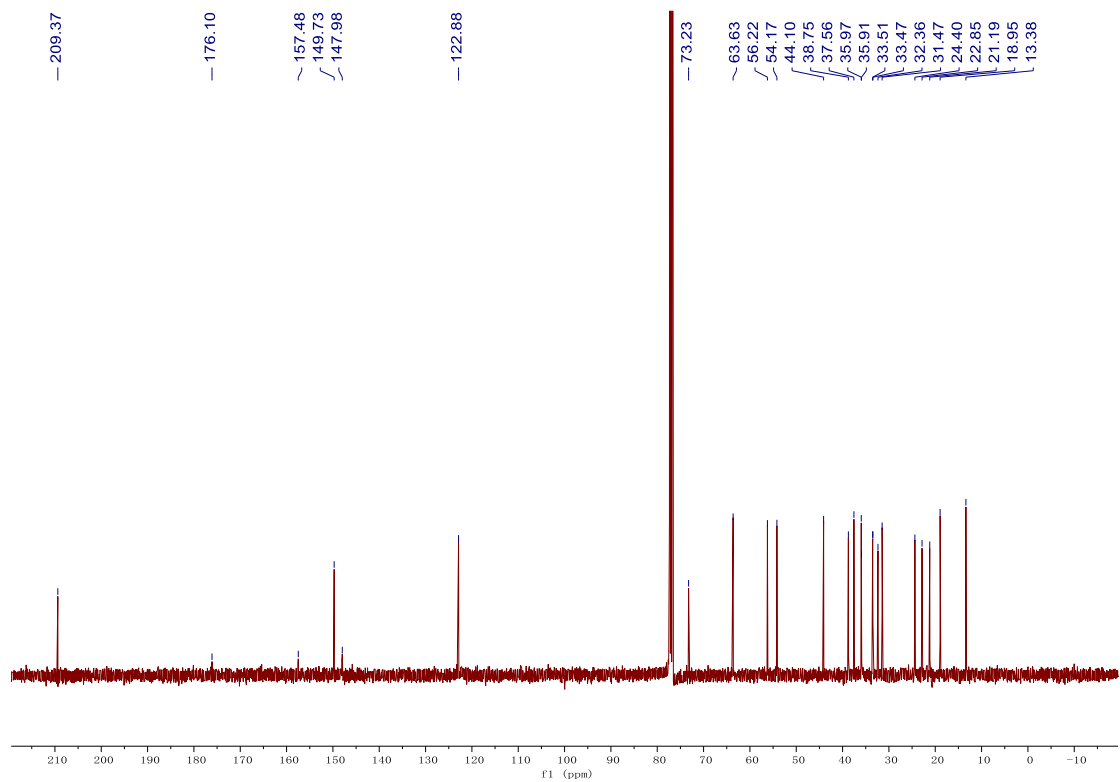

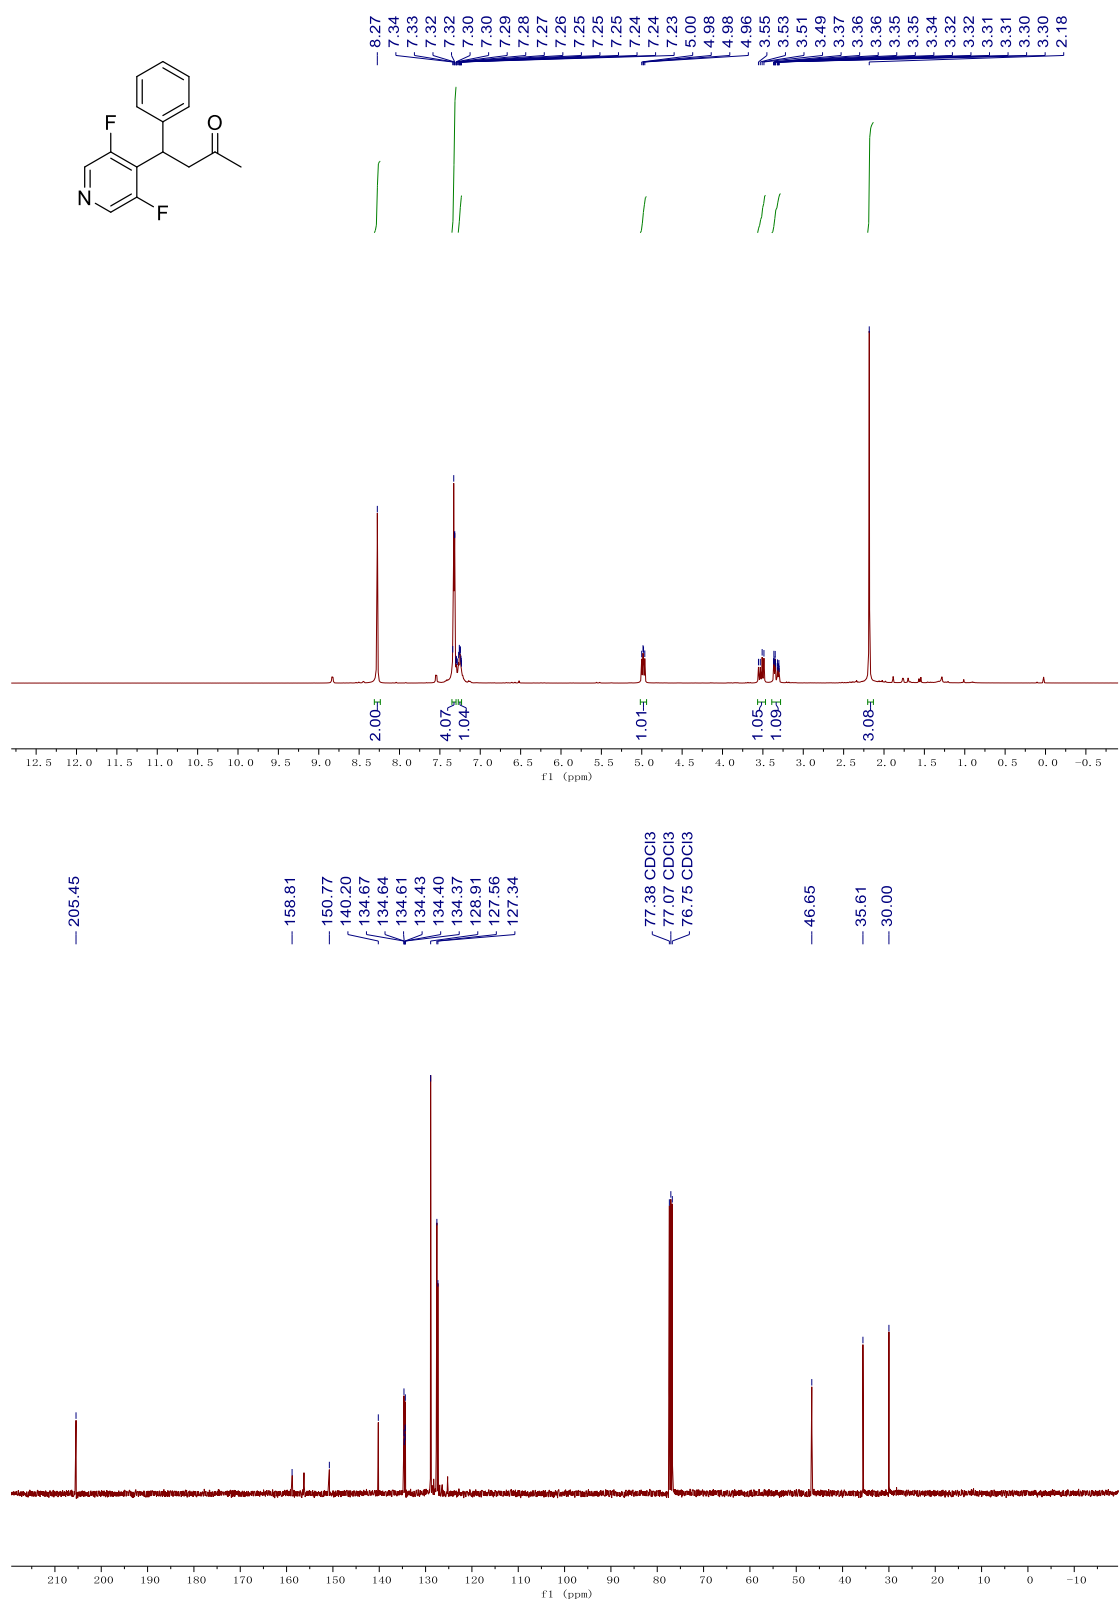

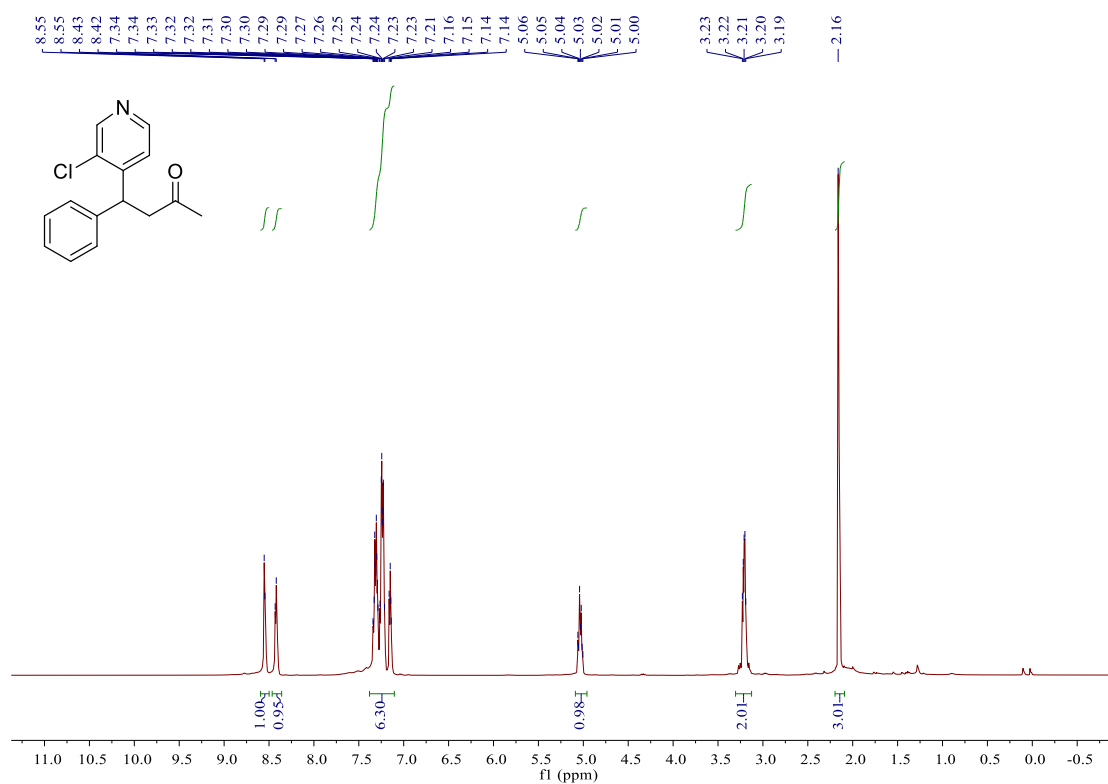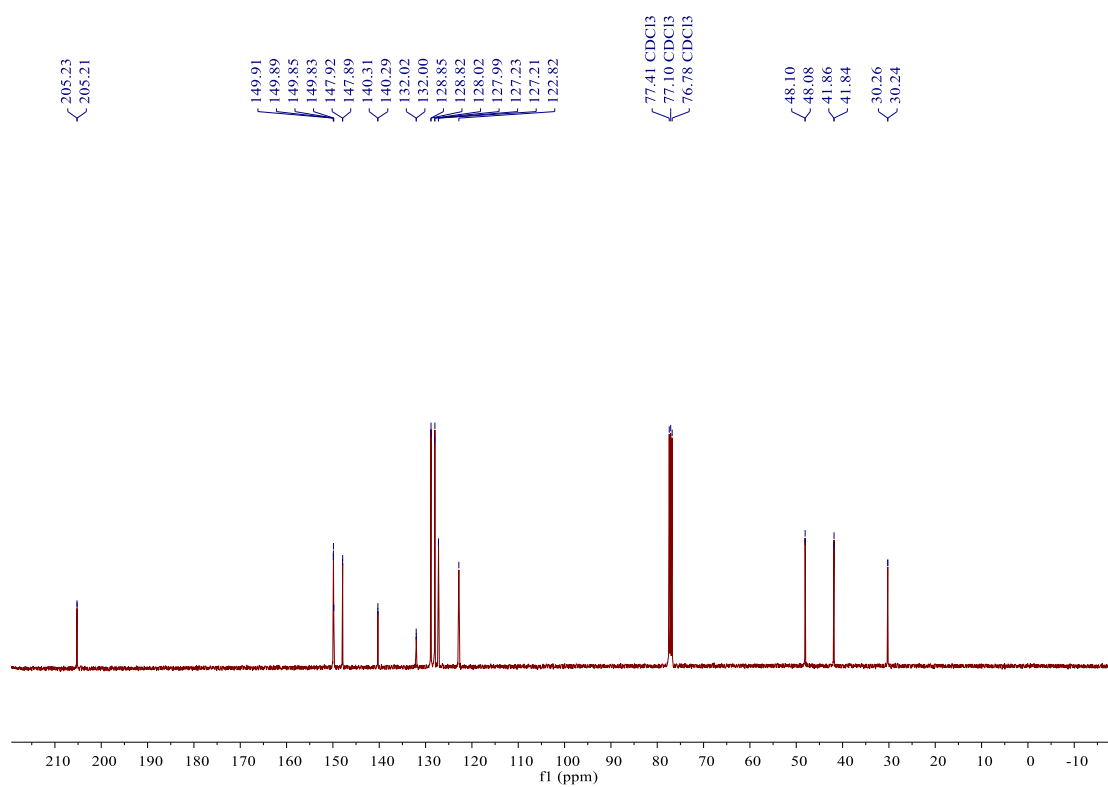

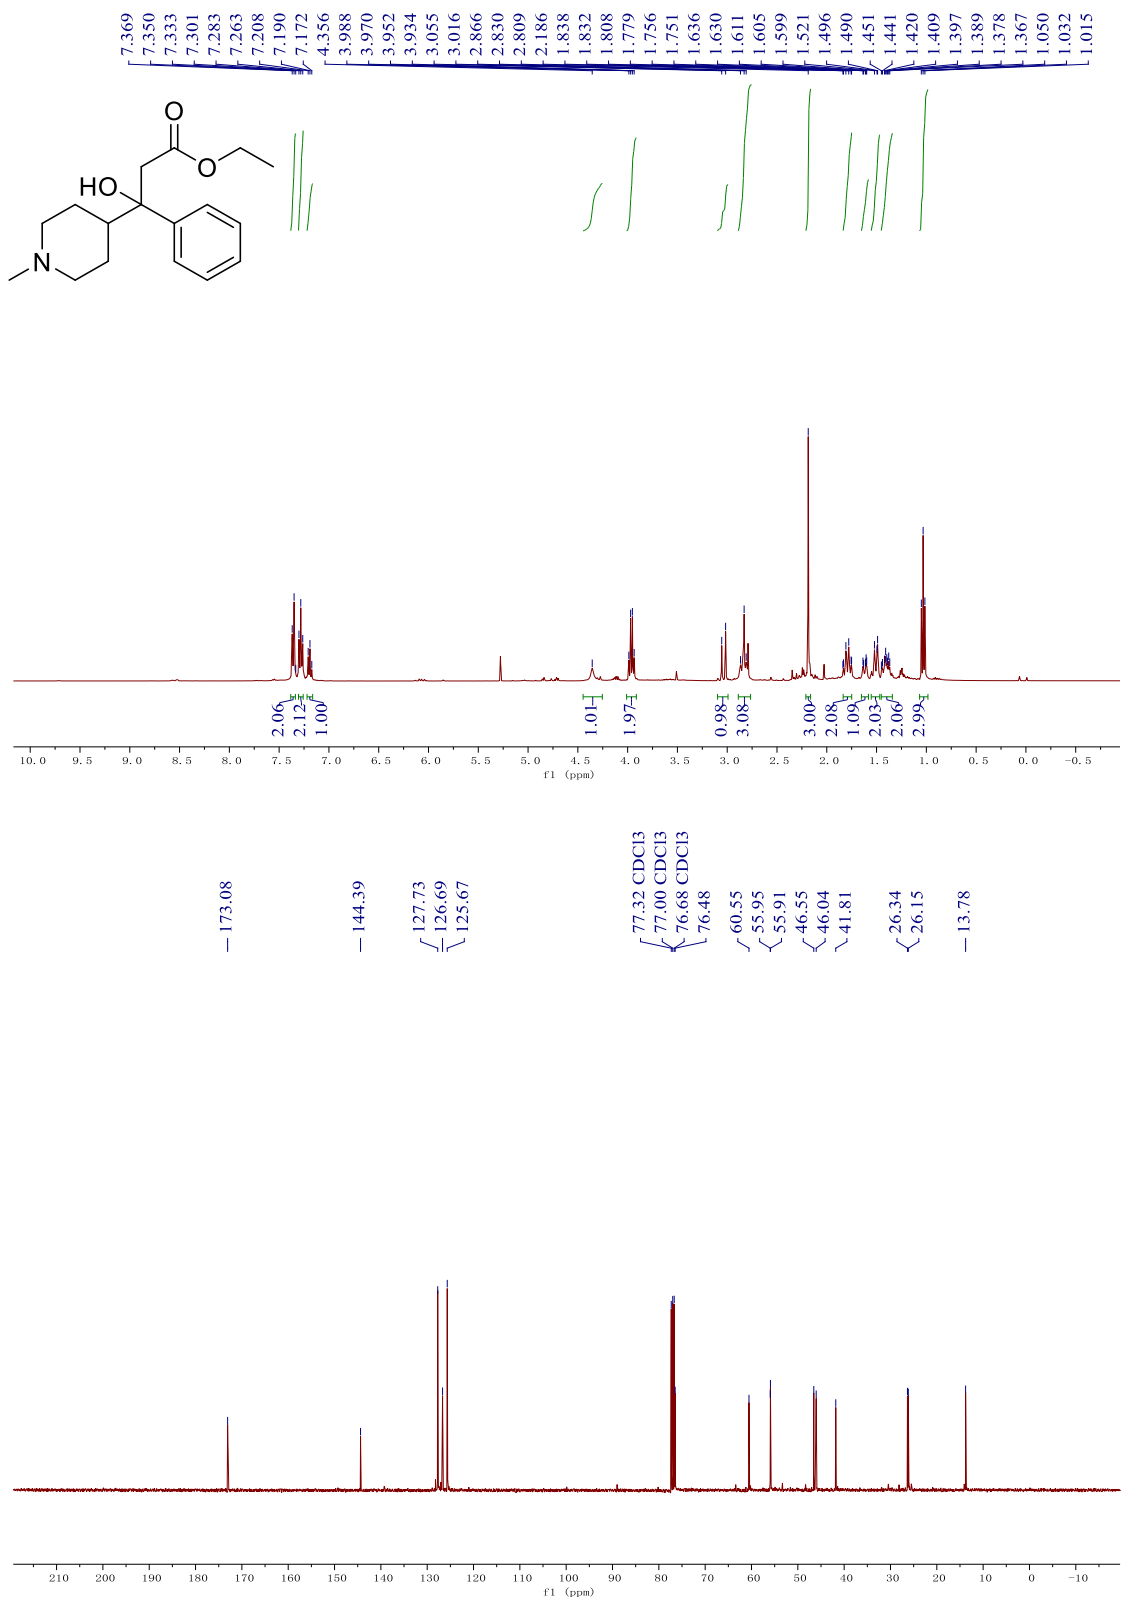

### 13. HPLC traces of mixture of diastereoisomers:

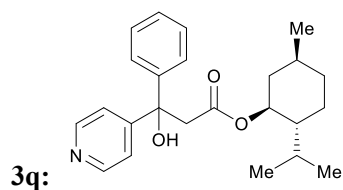

Diastereoisomers ratio: 49:51, determined by HPLC (Daicel Chiralpak ASH, hexane/isopropanol = 98/2, flow rate 0.5 mL/min, T = 25 °C, 220 nm):  $t_R$  = 26.35 min,  $t_R$  = 31.88 min.

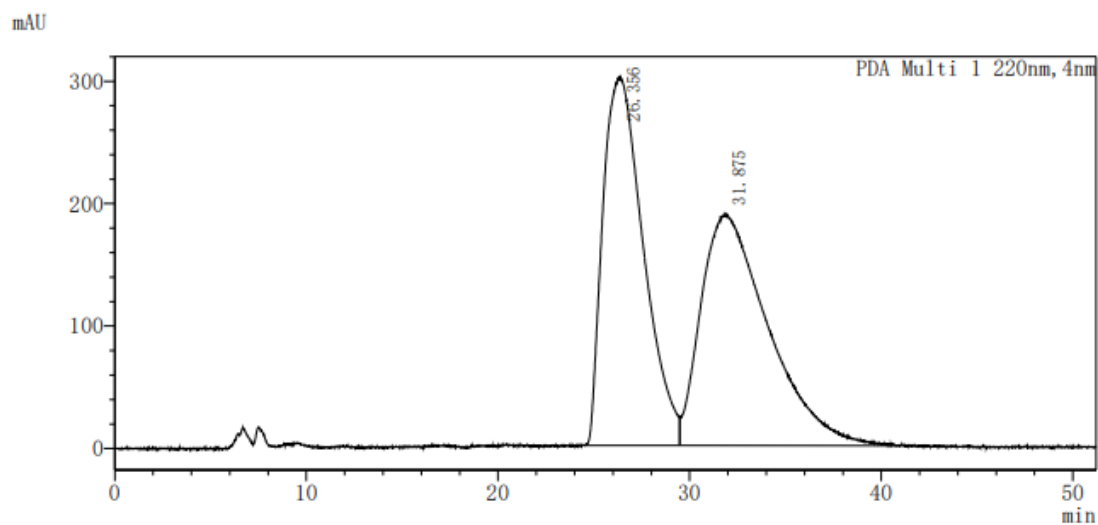

| Peak  | Ret Time[min] | Area[mAU*s] | Height [mAU] | Area %  |
|-------|---------------|-------------|--------------|---------|
| 1     | 26.356        | 44300633    | 300158       | 48.946  |
| 2     | 31.875        | 46208707    | 188678       | 51.054  |
| Total |               | 90509340    | 488837       | 100.000 |

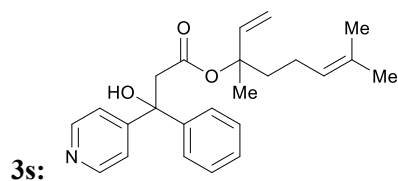

Diastereoisomers ratio: 30:24:23:23, determined by HPLC (Daicel Chiralpak ADH, hexane/isopropanol = 90/10, flow rate 0.5 mL/min, T = 25 °C, 220 nm):  $t_R$  = 16.39 min,  $t_R$  = 17.50 min,  $t_R$  = 18.87 min,  $t_R$  = 20.01 min.

mAU

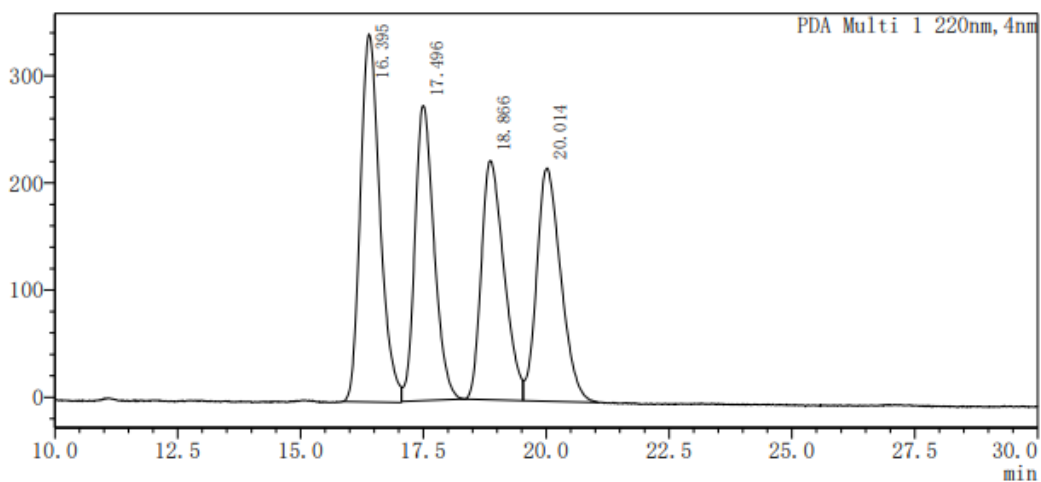

| Peak  | Ret Time[min] | Area[mAU*s] | Height [mAU] | Area %  |
|-------|---------------|-------------|--------------|---------|
| 1     | 16.395        | 9497180     | 343060       | 30.072  |
| 2     | 17.496        | 7472526     | 275105       | 23.661  |
| 3     | 18.866        | 7180017     | 223150       | 22.735  |
| 4     | 20.014        | 7431548     | 217478       | 23.532  |
| Total |               | 31581271    | 1058792      | 100.000 |

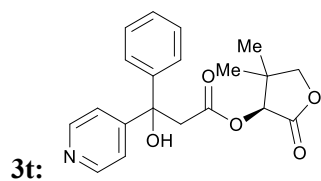

Diastereoisomers ratio: 54:46, determined by HPLC (Daicel Chiralpak ASH, hexane/isopropanol = 90/10, flow rate 0.5 mL/min, T = 25 °C, 220 nm):  $t_R$  = 60.53 min,  $t_R$  = 69.18 min.

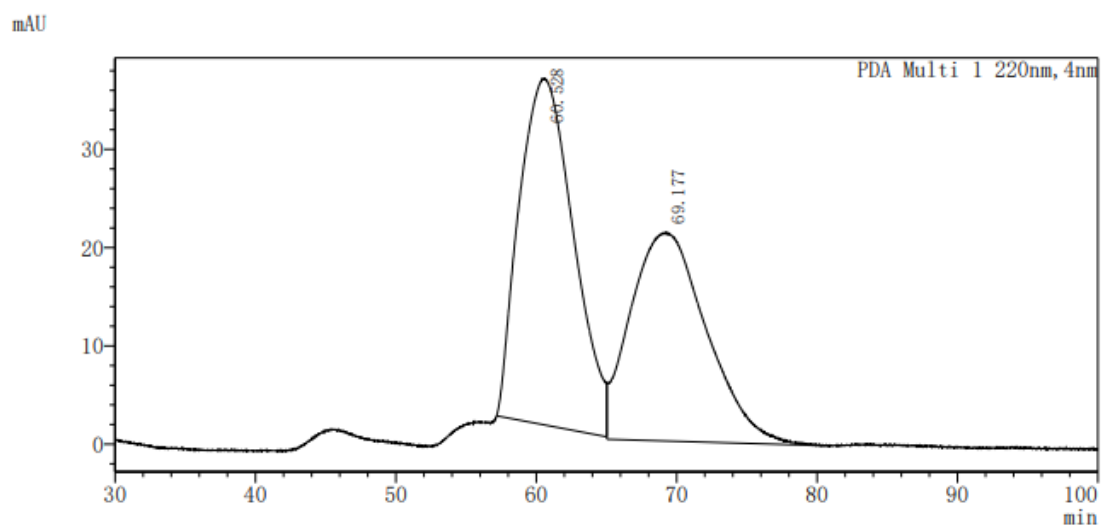

| Peak  | Ret Time[min] | Area[mAU*s] | Height [mAU] | Area %  |
|-------|---------------|-------------|--------------|---------|
| 1     | 60.528        | 9488549     | 35194        | 54.233  |
| 2     | 69.177        | 8007260     | 21147        | 45.767  |
| Total |               | 17495809    | 56341        | 100.000 |

**3u:**

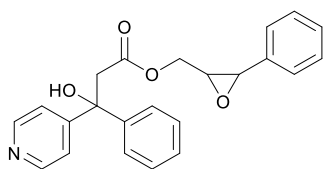

Diastereoisomers ratio: 24:26:26:24, determined by HPLC (Daicel Chiralpak ADH, hexane/isopropanol = 70/30, flow rate 0.5 mL/min, T = 25 °C, 220 nm):  $t_R$  = 27.17 min,  $t_R$  = 30.12 min,  $t_R$  = 32.30 min,  $t_R$  = 33.14 min.

mAU

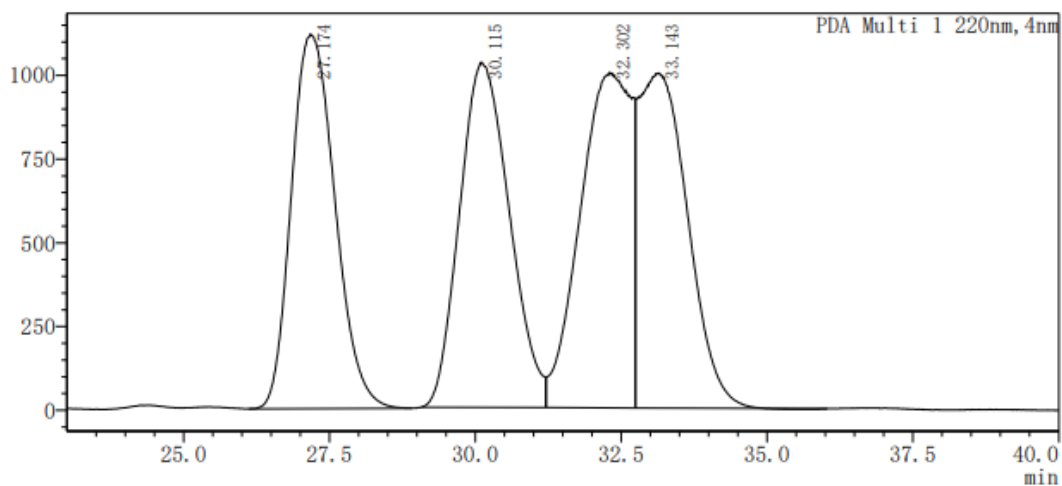

| Peak  | Ret Time[min] | Area[mAU*s] | Height [mAU] | Area %  |
|-------|---------------|-------------|--------------|---------|
| 1     | 27.174        | 58163075    | 1117478      | 24.391  |
| 2     | 30.115        | 61252311    | 1029764      | 25.687  |
| 3     | 32.302        | 61108079    | 1001399      | 25.626  |
| 4     | 33.143        | 57935943    | 1000331      | 24.296  |
| Total |               | 238459408   | 4148972      | 100.000 |

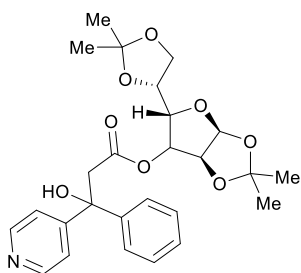

**3v:**

Diastereoisomers ratio: 49:51, determined by HPLC (Daicel Chiralpak ADH, hexane/isopropanol = 90/10, flow rate 0.5 mL/min, T = 25 °C, 220 nm):  $t_R$  = 65.67 min,  $t_R$  = 75.55 min.

mAU

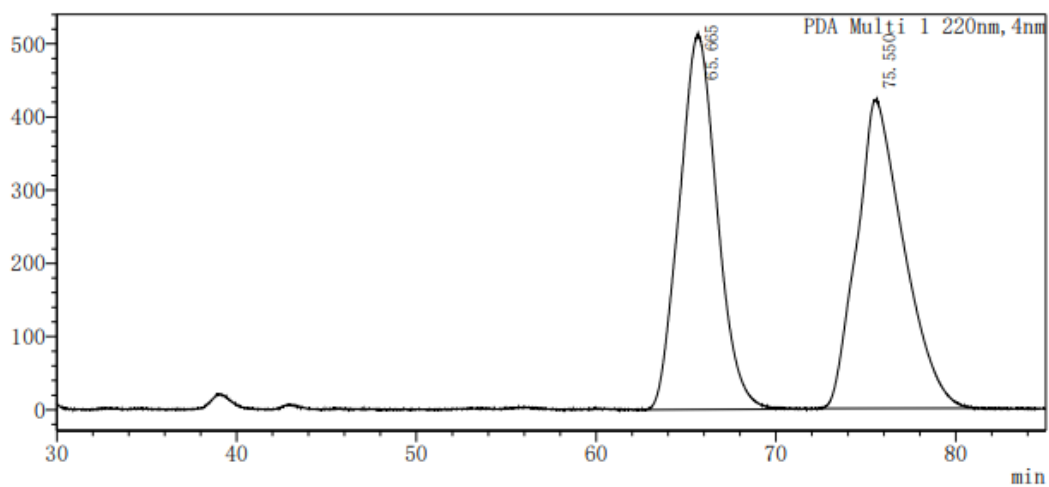

| Peak  | Ret Time[min] | Area[mAU*s] | Height [mAU] | Area %  |
|-------|---------------|-------------|--------------|---------|
| 1     | 65.665        | 74820936    | 511301       | 49.379  |
| 2     | 75.550        | 76703736    | 422524       | 50.621  |
| Total |               | 151524673   | 933825       | 100.000 |

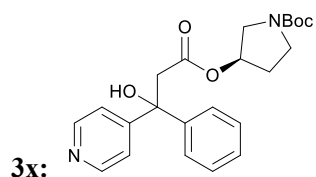

Diastereoisomers ratio: 49:51, determined by HPLC (Daicel Chiralpak ASH, hexane/isopropanol = 50/50, flow rate 0.5 mL/min, T = 25 °C, 220 nm):  $t_R$  = 8.67 min,  $t_R$  = 10.94 min.

mAU

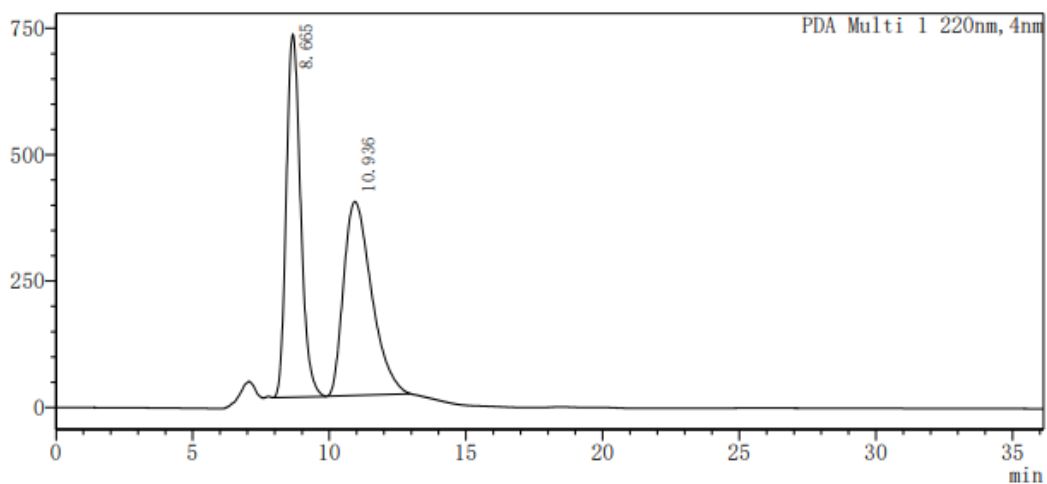

| Peak  | Ret Time[min] | Area[mAU*s] | Height [mAU] | Area %  |
|-------|---------------|-------------|--------------|---------|
| 1     | 8.665         | 26159562    | 717665       | 48.846  |
| 2     | 10.936        | 27395806    | 383387       | 51.154  |
| Total |               | 53555368    | 1101052      | 100.000 |

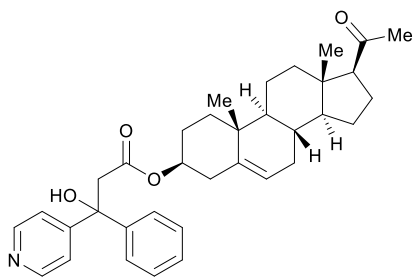

**3z:**

Diastereoisomers ratio: 48:52, determined by HPLC (Daicel Chiralpak OZH, hexane/isopropanol = 70/30, flow rate 0.5 mL/min, T = 25 °C, 220 nm):  $t_R$  = 67.17 min,  $t_R$  = 77.04 min.

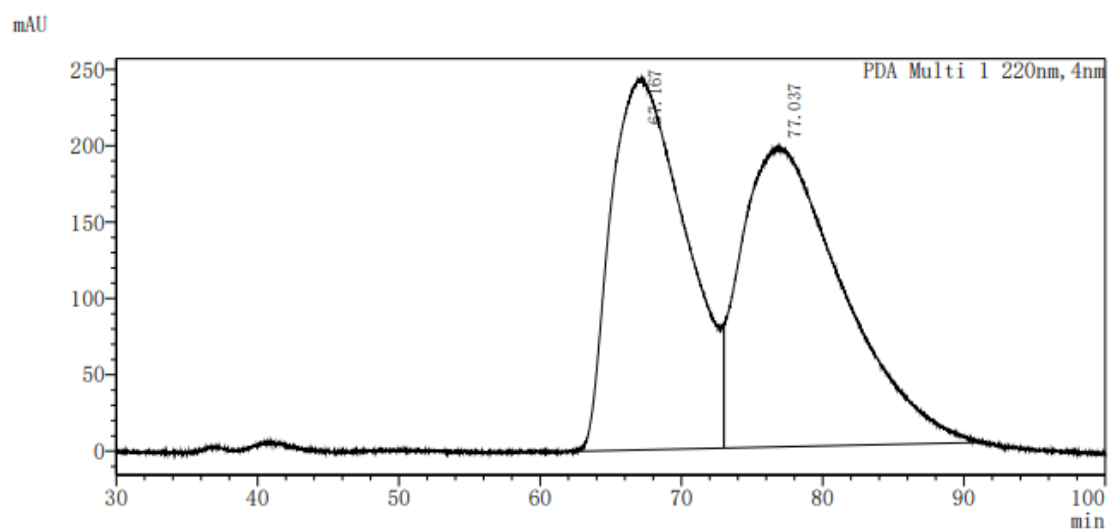

| Peak  | Ret Time[min] | Area[mAU*s] | Height [mAU] | Area %  |
|-------|---------------|-------------|--------------|---------|
| 1     | 67.167        | 89721553    | 242395       | 47.695  |
| 2     | 77.037        | 98393916    | 195983       | 52.305  |
| Total |               | 188115469   | 438378       | 100.000 |

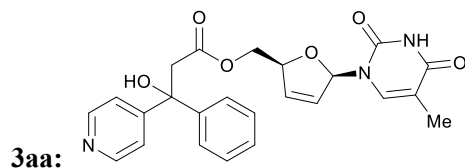

Diastereoisomers ratio: 49:51, determined by HPLC (Daicel Chiralpak ODH, hexane/isopropanol = 50/50, flow rate 0.5 mL/min, T = 25 °C, 220 nm):  $t_R$  = 34.47 min,  $t_R$  = 40.29 min.

mAU

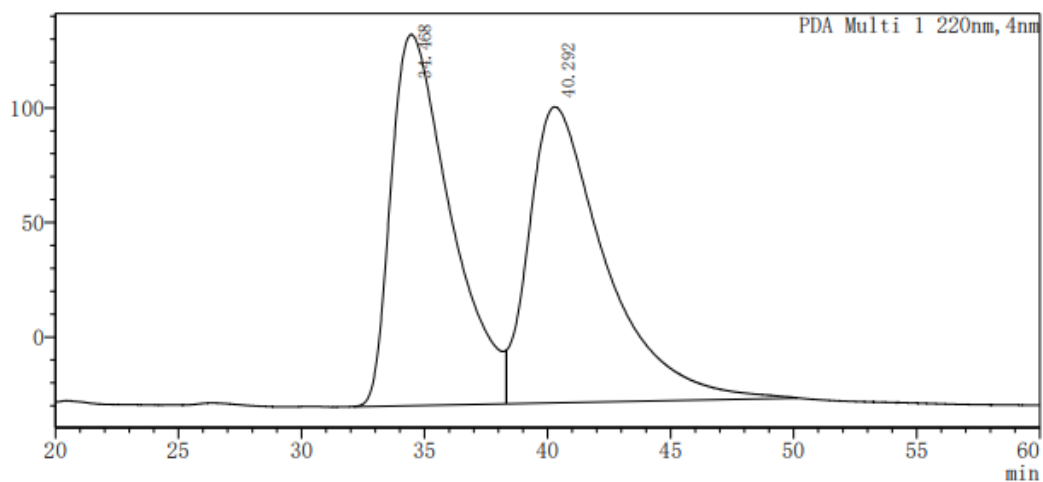

| Peak  | Ret Time[min] | Area[mAU*s] | Height [mAU] | Area %  |
|-------|---------------|-------------|--------------|---------|
| 1     | 34.468        | 27287258    | 162030       | 49.316  |
| 2     | 40.292        | 28044107    | 129127       | 50.684  |
| Total |               | 55331364    | 291158       | 100.000 |

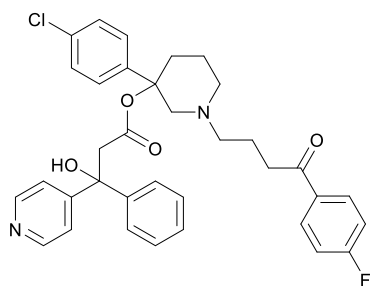

**3ab:**

Diastereoisomers ratio: 46:54, determined by HPLC (Daicel Chiralpak ASH, hexane/isopropanol = 85/15, flow rate 0.5 mL/min, T = 25 °C, 220 nm):  $t_R$  = 40.36 min,  $t_R$  = 47.49 min.

mAU

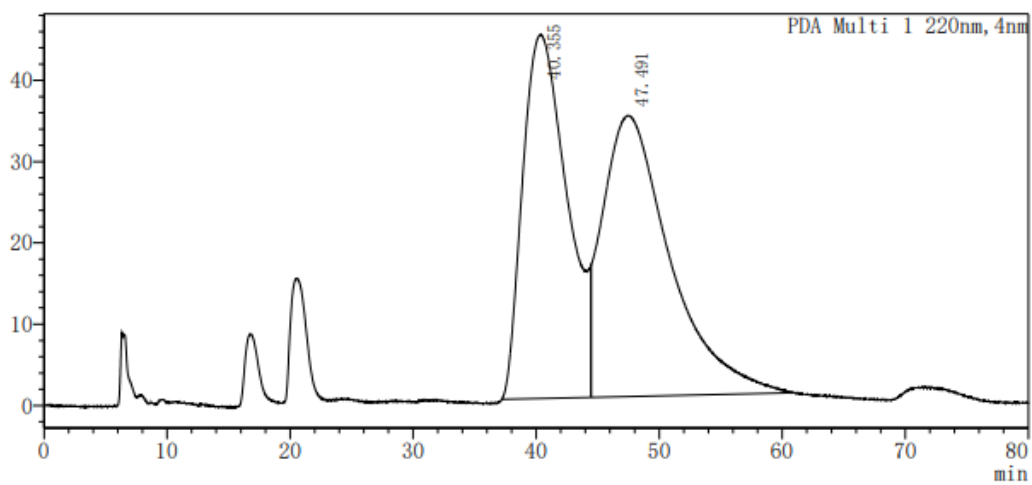

| Peak  | Ret Time[min] | Area[mAU*s] | Height [mAU] | Area %  |
|-------|---------------|-------------|--------------|---------|
| 1     | 40.355        | 11289526    | 44753        | 46.147  |
| 2     | 47.491        | 13175000    | 34572        | 53.853  |
| Total |               | 24464526    | 79325        | 100.000 |

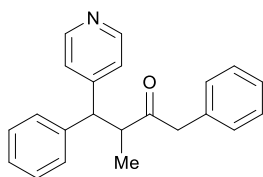

**3ar:**

Diastereoisomers ratio: 49:51, determined by HPLC (Daicel Chiralpak ADH, hexane/isopropanol = 90/10, flow rate 0.5 mL/min, T = 25 °C, 220 nm):  $t_R$  = 28.56 min,  $t_R$  = 35.36 min.

mAU

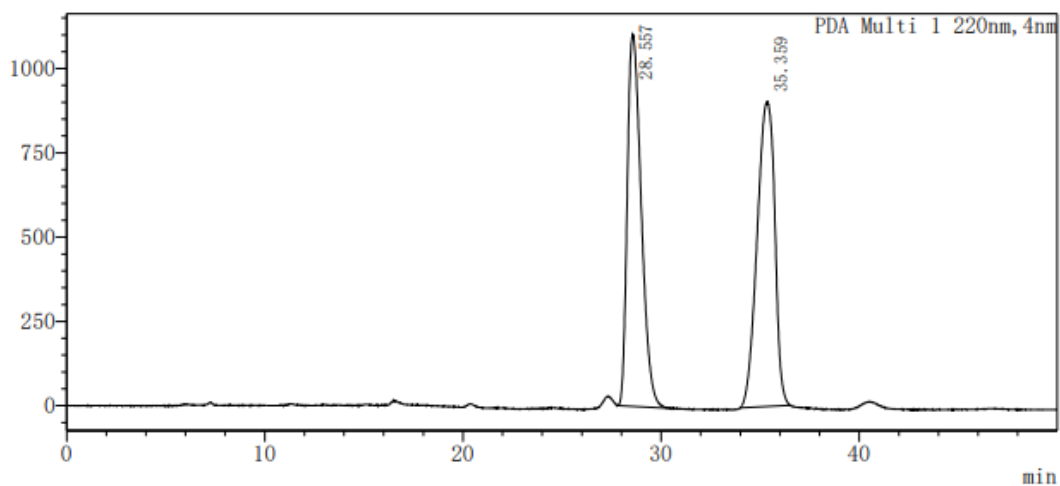

| Peak  | Ret Time[min] | Area[mAU*s] | Height [mAU] | Area %  |
|-------|---------------|-------------|--------------|---------|
| 1     | 28.557        | 53851770    | 1101927      | 49.031  |
| 2     | 35.359        | 55979698    | 903873       | 50.969  |
| Total |               | 109831468   | 2005800      | 100.000 |

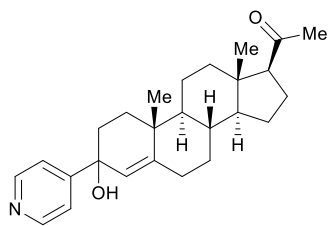

**3aw:**

Diastereoisomers ratio: 67:33, determined by HPLC (Daicel Chiralpak ADH, hexane/isopropanol = 90/10, flow rate 0.5 mL/min, T = 25 °C, 220 nm):  $t_R$  = 37.69 min,  $t_R$  = 45.91 min.

mAU

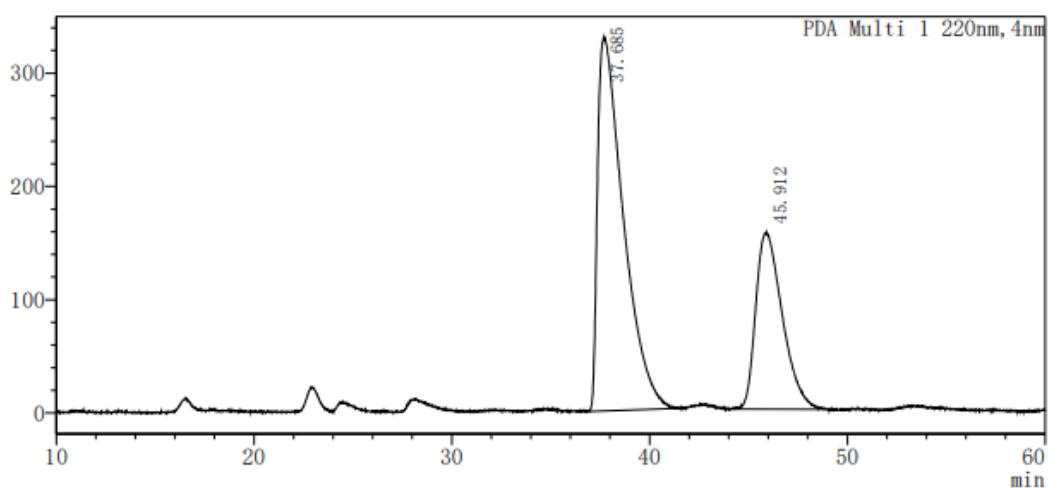

| Peak  | Ret Time[min] | Area[mAU*s] | Height [mAU] | Area %  |
|-------|---------------|-------------|--------------|---------|
| 1     | 37.685        | 29983811    | 329642       | 67.187  |
| 2     | 45.912        | 14643620    | 156203       | 32.813  |
| Total |               | 44627431    | 485845       | 100.000 |
